# Supplementary material for: Halogen bond promoted aryl migration of allylic alcohols under visible light irradiation
Source: Royal Society of Chemistry journal article supplement (doi:10.1039/d2qo01035f), 2022-01-01

## **Halogen bond promoted aryl migration of allyl alcohols under visible light irradiation**

Keyuan Zhang,<sup>a</sup> Yulong Wang,<sup>a</sup> Chonglong He,<sup>a</sup> Youkang Zhou,<sup>a</sup> Dan-Ning Wang,<sup>a</sup> Mingyou Hu,<sup>a</sup> Xin-Hua Duan<sup>a</sup> and Le Liu<sup>\*a</sup>

<sup>a</sup> School of Chemistry, Xi'an Key Laboratory of Sustainable Energy Material Chemistry, Xi'an Jiaotong University, Xi'an 710049, China.

## Table of content

|     |                                                                                                                                       |     |
|-----|---------------------------------------------------------------------------------------------------------------------------------------|-----|
| 1.  | General information                                                                                                                   | S3  |
| 2.  | Optimization of the reaction conditions                                                                                               | S4  |
| 3.  | General procedures                                                                                                                    | S7  |
| 4.  | Characterization of products                                                                                                          | S8  |
| 5.  | TEMPO inhibition experiment                                                                                                           | S19 |
| 6.  | Sunlight irradiation experiment                                                                                                       | S20 |
| 7.  | Scaleup experiment                                                                                                                    | S21 |
| 8.  | Quantum yield measurement                                                                                                             | S21 |
| 9.  | Light on/off experiment                                                                                                               | S24 |
| 10. | UV–vis absorption spectra                                                                                                             | S25 |
| 11. | <sup>19</sup> FNMR Titration of C <sub>4</sub> F <sub>9</sub> I ( <b>2a</b> ) with Et <sub>3</sub> N                                  | S27 |
| 12. | Determination of binding stoichiometry of halogen bond between<br>C <sub>4</sub> F <sub>9</sub> I ( <b>2a</b> ) and Et <sub>3</sub> N | S28 |
| 12. | Reference                                                                                                                             | S29 |
| 13. | NMR spectra                                                                                                                           | S30 |

## 1. General information

<sup>1</sup>H NMR and <sup>13</sup>C NMR spectra were recorded on a Bruker Advance and JEOL III-400 spectrometer at 25 °C in solvents as indicated. Chemical shift values are reported in ppm with the solvent resonance referred to the standard position (CDCl<sub>3</sub>; <sup>1</sup>H NMR: δ = 7.26; <sup>13</sup>C NMR: δ = 77.16). The peak patterns are indicated as follows: s, singlet; d, doublet; t, triplet; q, quartet; m, multiplet and dd, doublet of doublets. The coupling constants *J* are reported in Hertz (Hz). HRMS were obtained on a QTOF micro spectrometer. Melting points were measured using open glass capillaries in SGW® X-4A apparatus.

All reactions were conducted in oven-dried Round bottom flask under an atmosphere of nitrogen. Unless otherwise stated, all reagents were purchased from commercial sources and used without further purification. Conversion of the reactions was monitored by thin layer chromatography (TLC) using Merck TLC silica gel 60 F254. Compounds were visualized by UV light at 254 nm and by dipping the plates in an aqueous potassium permanganate solution followed by heating. Flash column chromatography was performed over silica gel (230-400 mesh). All the allylic alcohols were prepared according to reported method.<sup>1</sup>

## 2. Optimization of the reaction conditions

### 2.1 Optimization of reaction conditions for perfluorobutyl iodide 2a

**Table S1: Screening of the additives**

Reaction scheme: 1,1-diphenylprop-2-en-1-ol (**1**) + C<sub>4</sub>F<sub>9</sub>I (**2a**)  $\xrightarrow[\text{DMSO, N}_2, \text{r.t., 24h, 20 W Blue LEDs}]{\text{Additive}}$  1,1-diphenylprop-2-en-1-yl perfluorobutyl ether (**3aa**) + 1,1-diphenylprop-2-en-1-yl iodide (**3b**)

| Entry <sup>a</sup> | Additive                                           | Yield of <b>3aa</b> <sup>b</sup> (%) |
|--------------------|----------------------------------------------------|--------------------------------------|
| 1                  | Et <sub>3</sub> N (2.0 equiv)                      | 30                                   |
| 2                  | DIPEA (2.0 equiv)                                  | 35                                   |
| 3                  | Bu <sub>3</sub> N (2.0 equiv)                      | 73                                   |
| 4                  | Bu <sub>3</sub> N (2.0 equiv) + HCOOH (2.0 equiv.) | 82                                   |
| 5                  | HCOOH (2.0 equiv.)                                 | 26                                   |
| 6                  | —                                                  | NR                                   |

<sup>a</sup> All reactions were carried out with 1,1-diphenylprop-2-en-1-ol **1a** (0.1 mmol), perfluorobutyl iodide **2a** (0.2 mmol), and the additive as indicated in DMSO (2.0 mL) under N<sub>2</sub> at rt for 24 h. <sup>b</sup> Isolated yield. NR means no reaction occurred.

**Note:** For the reactions running under conditions indicated in entries 1-3, the atom transfer radical addition (ATRA) product **3b** was also formed as the main side-product. While only trace amount of **3b** was observed when the combination of Bu<sub>3</sub>N and HCOOH were employed as the additive, and the yield was further improved to 82%. Control experiment revealed that additive was crucial to the transformation, since no reaction occurred when the reaction mixture was irradiated with blue LEDs without additives.



**Table S2: Screening of light source**

$\text{1a} + \text{C}_4\text{F}_9\text{I} \xrightarrow[\text{DMSO, N}_2, \text{r.t., 24h}]{\text{Bu}_3\text{N (2 equiv), HCO}_2\text{H (2 equiv), Light Irradiation}} \text{3aa}$

| Entry <sup>a</sup> | Light source              | Yield of <b>3aa</b> <sup>b</sup> (%) |
|--------------------|---------------------------|--------------------------------------|
| 1                  | 10 W blue LEDs (465nm)    | 67                                   |
| 2                  | 20 W blue LEDs (465 nm)   | 82                                   |
| 3                  | 30 W blue LEDs (465nm)    | 58                                   |
| 4                  | 30 W purple LEDs (390 nm) | 58                                   |

<sup>a</sup> All reactions were carried out with 1,1-diphenylprop-2-en-1-ol **1a** (0.1 mmol), perfluorobutyl iodide **2a** (0.2 mmol), Bu<sub>3</sub>N (0.2 mmol), HCOOH (0.2mmol) in DMSO (2.0 mL) under N<sub>2</sub> at rt for 24 h. <sup>b</sup> Isolated yield.

**Table S3: Control experiments**

$\text{1} + \text{C}_4\text{F}_9\text{I} \xrightarrow[\text{DMSO, N}_2, \text{r.t., 24h}]{\text{Bu}_3\text{N (2 equiv), HCO}_2\text{H (2 equiv), 20 W Blue LEDs}} \text{3aa}$

| Entry <sup>a</sup> | Variations of the reaction conditions     | Yield of <b>3aa</b> <sup>b</sup> (%) |
|--------------------|-------------------------------------------|--------------------------------------|
| 1                  | –                                         | 82                                   |
| 2                  | Without HCOOH                             | 73                                   |
| 3                  | Without Bu <sub>3</sub> N                 | 26                                   |
| 4                  | HCOONa instead of Bu <sub>3</sub> N/HCOOH | trace                                |
| 5                  | No light                                  | trace                                |
| 6                  | With 20% Bu <sub>3</sub> N/HCOOH          | 20                                   |

<sup>a</sup> All reactions were carried out with 1,1-diphenylprop-2-en-1-ol **1a** (0.1 mmol), perfluorobutyl iodide **2a** (0.2 mmol) the additive as indicated in DMSO (2.0 mL) under N<sub>2</sub> at rt for 24 h. <sup>b</sup> Isolated yield.

## 2.2 Optimization of reaction conditions for ethyl 2-bromo-2,2-difluoroacetate **2b**

**Table S4: Screening of concentration**

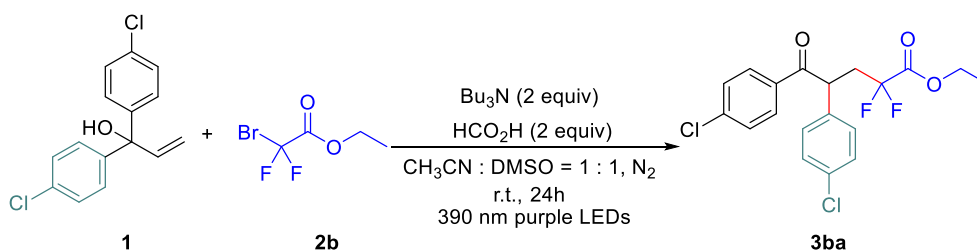

| Entry <sup>a</sup> | Concentration (M) | Yield of <b>3ba</b> <sup>b</sup> (%) |
|--------------------|-------------------|--------------------------------------|
| 1                  | 0.1               | 51                                   |
| 2                  | 0.2               | 54                                   |
| 3                  | 0.05              | 75                                   |

<sup>a</sup> All reactions were carried out with 1,1-bis(4-chlorophenyl)prop-2-en-1-ol **1c** (0.1 mmol), ethyl 2-bromo-2,2-difluoroacetate **2b** (0.2 mmol),  $\text{Bu}_3\text{N}$  (0.2 mmol),  $\text{HCOOH}$  (0.2 mmol) in  $\text{MeCN}/\text{DMSO}$  (1:1, v/v) (2.0 mL) under  $\text{N}_2$  at rt for 24 h. <sup>b</sup> Isolated yield.

**Table S5: Screening of light source**

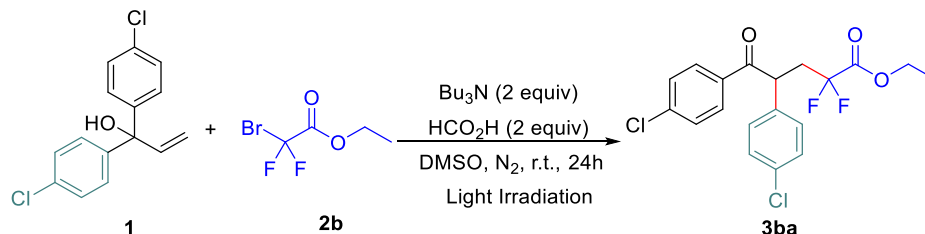

| Entry <sup>a</sup> | Light source   | Yield of <b>3ba</b> <sup>b</sup> (%) |
|--------------------|----------------|--------------------------------------|
| 1                  | 30 W blue LEDs | 88                                   |
| 2                  | 10 W blue LEDs | 76                                   |
| 3                  | 20 W blue LEDs | 88                                   |

<sup>a</sup> All reactions were carried out with 1,1-bis(4-chlorophenyl)prop-2-en-1-ol **1c** (0.1 mmol), ethyl 2-bromo-2,2-difluoroacetate **2b** (0.2 mmol),  $\text{Bu}_3\text{N}$  (0.2 mmol),  $\text{HCOOH}$  (0.2 mmol) in  $\text{DMSO}$  (2.0 mL) under  $\text{N}_2$  at rt for 24 h. <sup>b</sup> Isolated yield.

**Table S6: Screening of the solvents**
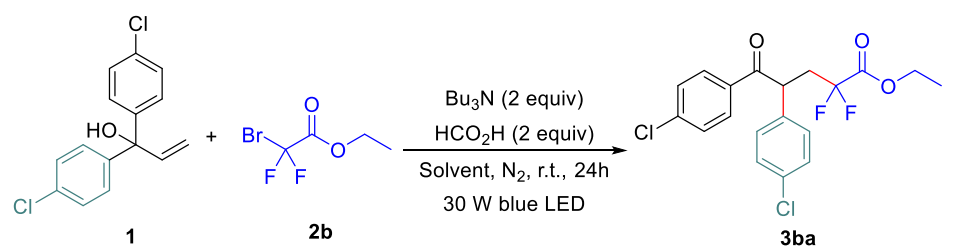

| Entry <sup>a</sup> | Solvent            | Yield of <b>3ba</b> <sup>b</sup> (%) |
|--------------------|--------------------|--------------------------------------|
| 1                  | DMSO               | 88                                   |
| 2                  | CH <sub>3</sub> CN | 55                                   |

<sup>a</sup> All reactions were carried out with 1,1-bis(4-chlorophenyl)prop-2-en-1-ol **1c** (0.1 mmol), ethyl 2-bromo-2,2-difluoroacetate **2b** (0.2 mmol), Bu<sub>3</sub>N (0.2 mmol), HCOOH (0.2 mmol) in Solvent (2.0 mL) under N<sub>2</sub> at rt for 24 h. <sup>b</sup> Isolated yield.

**Table S7: Screening of the base**
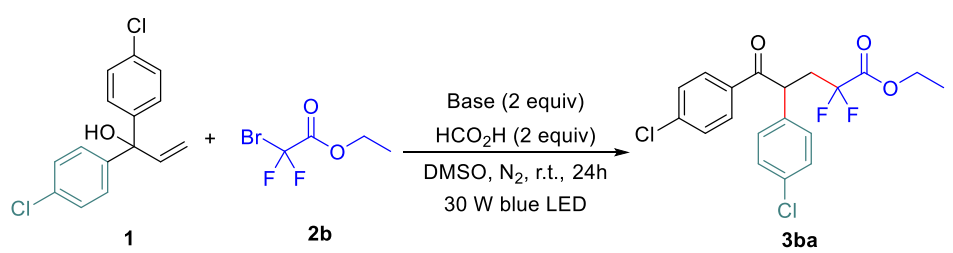

| Entry <sup>a</sup> | Base (2.0 equiv)  | Yield of <b>3ba</b> <sup>b</sup> (%) |
|--------------------|-------------------|--------------------------------------|
| 1                  | Et <sub>3</sub> N | 67                                   |
| 2                  | DIPEA             | 57                                   |
| 3                  | Bu <sub>3</sub> N | 88                                   |

<sup>a</sup> All reactions were carried out with 1,1-bis(4-chlorophenyl)prop-2-en-1-ol **1c** (0.1 mmol), ethyl 2-bromo-2,2-difluoroacetate **2b** (0.2 mmol), base (0.2 mmol), HCOOH (0.2 mmol) in DMSO (2.0 mL) under N<sub>2</sub> at rt for 24 h. <sup>b</sup> Isolated yield.

### 3. General procedure

#### General procedure for the preparation of allyl alcohols

Following the reported procedure,<sup>1</sup> to a solution of aldehyde/ketone (5 mmol) in dry THF was added vinylmagnesium bromide (1 M in THF, 1.2 equiv.) under nitrogen atmosphere by a syringe over 5 min at 0 °C. Then, the reaction mixture was allowed to warm to room temperature and stirred for additional 3 hours. The reaction was monitored by TLC. After completion, the reaction mixture was quenched with a saturated NH<sub>4</sub>Cl aqueous solution (20 mL) and extracted with ethyl acetate (3×70 mL). The combined organic layer was washed with brine (50 mL), dried over Na<sub>2</sub>SO<sub>4</sub> and concentrated under reduce pressure

to give the crude allylic alcohols which was purified by a flash chromatograph (PE/EA) on silica gel with petroleum ether/ethyl acetate mixture as eluent to afford the corresponding pure products. The NMR data were consistent with the reported reference.

#### General procedure for the synthesis of aryl migration products

A 5 mL Schlenk tube containing a PTFE-coated stirring bar was charged with  $\alpha,\alpha$ -diaryl allylic alcohols (1, 0.1 mol). The vessel was then evacuated and filled with nitrogen three times. Then, DMSO (2 mL) was added, followed by the addition of perfluorobutyl iodide **2a** (0.2 mmol, 34.4  $\mu$ L), tributylamine (0.2 mmol, 47.5  $\mu$ L) and formic acid (0.2 mmol, 6.6  $\mu$ L) under nitrogen flow. Finally, the tube was sealed and placed in the photoreactor about 2 cm away from a 20 W blue LEDs light irradiation with a water chiller to maintain the temperature at 25 °C. After 24 hours, the reaction was then quenched with satd.  $\text{NH}_4\text{Cl}$  solution (15 mL) and extracted with ethyl acetate (3  $\times$  10 mL). The organic layer was concentrated, the crude residue was purified by column chromatography on silica gel with petroleum ether/ethyl acetate mixture as eluent to give the corresponding products.

#### 4. Characterization of products

##### 4,4,5,5,6,6,7,7,7-Nonafluoro-1,2-diphenylheptan-1-one (3aa)

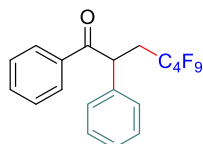

82% yield, 35.1 mg; yellow oil;  $^1\text{H}$  NMR (400 MHz,  $\text{CDCl}_3$ )  $\delta$  8.00 – 7.97 (m, 2H), 7.55 – 7.51 (m, 1H), 7.43 (t,  $J_1 = 7.5$  Hz, 2H), 7.36 – 7.31 (m, 4H), 7.29 – 7.25 (m, 1H), 5.05 (dd,  $J_1 = 8.4$  Hz,  $J_2 = 4.2$  Hz, 1H), 3.54 – 3.39 (m, 1H), 2.53 – 2.38 (m, 1H);  $^{19}\text{F}$  NMR (376 MHz,  $\text{CDCl}_3$ )  $\delta$  - 81.0 to - 81.1 (m, 3F), - 111.8 to - 113.9 (m, 2F), - 124.3 to - 124.4 (m, 2F), - 125.9 to - 126.1 (m, 2F);  $^{13}\text{C}$  NMR (100 MHz,  $\text{CDCl}_3$ )  $\delta$  196.8, 137.8, 135.7, 133.5, 129.6, 129.0, 128.8, 128.2, 128.0, 45.7, 34.4 (t,  $J_{\text{C-F}} = 26.0$  Hz); The spectra data are consistent with the reported reference.<sup>2</sup>

##### 4,4,5,5,6,6,7,7,7-Nonafluoro-1,2-bis(4-fluorophenyl)heptan-1-one (3ab)

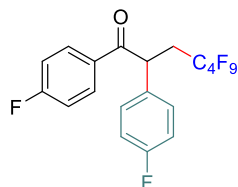

35% yield, 16.3 mg; yellow oil;  $^1\text{H}$  NMR (400 MHz,  $\text{CDCl}_3$ )  $\delta$  8.00 – 7.97 (m, 2H), 7.30 – 7.26 (m, 2H), 7.12 – 7.07 (m, 2H), 7.04 – 7.00 (m, 2H), 4.97 (dd,  $J_1 = 8.2$  Hz,  $J_2 = 4.6$  Hz, 1H), 3.46 – 3.31 (m, 1H), 2.50 – 2.35 (m, 1H);  $^{19}\text{F}$  NMR (376 MHz,  $\text{CDCl}_3$ )  $\delta$  - 81.0 to - 81.1 (m, 3F), - 103.9 to - 104.0 (m, 2F), - 113.6 to - 113.7 (m, 2F), - 124.4 to - 124.5 (m, 2F), - 125.9 to - 126.0 (m, 2F);  $^{13}\text{C}$  NMR (100 MHz,  $\text{CDCl}_3$ )  $\delta$  195.2, 166.0 (d,  $J_{\text{C-F}} = 254.7$  Hz), 162.5 (d,  $J_{\text{C-F}} = 246.5$  Hz), 133.3 (d,  $J_{\text{C-F}} = 3.6$  Hz), 131.9 (d,  $J_{\text{C-F}} = 3.5$  Hz), 131.6 (d,  $J_{\text{C-F}} = 9.6$  Hz), 129.8 (d,  $J_{\text{C-F}} = 8.4$  Hz), 116.7 (d,  $J_{\text{C-F}} = 21.6$  Hz),

116.1 (d,  $J_{C-F} = 21.9$  Hz), 44.9, 34.5 (t,  $J_{C-F} = 22.1$  Hz); The spectra data are consistent with the reported reference.<sup>2</sup>

**1,2-Bis(4-chlorophenyl)-4,4,5,5,6,6,7,7,7-nonafluoroheptan-1-one (3ac)**

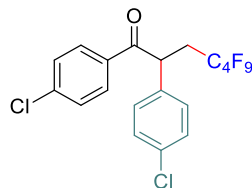

83% yield, 41.3 mg; yellow oil; <sup>1</sup>H NMR (400 MHz, CDCl<sub>3</sub>) δ 7.90 – 7.86 (m, 2H), 7.41 – 7.38 (m, 2H), 7.33 – 7.28 (m, 2H), 7.25 – 7.21 (m, 2H), 4.95 (dd,  $J_1 = 8.4$  Hz,  $J_2 = 4.6$  Hz, 1H), 3.46 – 3.31 (m, 1H), 2.50 – 2.36 (m, 1H); <sup>19</sup>F NMR (376 MHz, CDCl<sub>3</sub>) δ - 81.0 (t,  $J = 9.5$ , 3F), - 111.6 to - 114.0 (m, 2F), - 124.3(9) to - 124.4(3) (m, 2F), - 125.9 to - 126.0 (m, 2F); <sup>13</sup>C NMR (100 MHz, CDCl<sub>3</sub>) δ 195.3, 140.4, 135.8, 134.3, 133.7, 130.3, 129.9, 129.5, 129.3, 45.1, 34.3 (t,  $J_{C-F} = 20.8$  Hz); The spectra data are consistent with the reported reference.<sup>2</sup>

**1,2-Bis(4-bromophenyl)-4,4,5,5,6,6,7,7,7-nonafluoroheptan-1-one (3ad)**

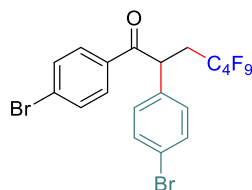

58% yield, 34.0 mg; yellow oil; <sup>1</sup>H NMR (400 MHz, CDCl<sub>3</sub>) δ 7.81 – 7.78 (m, 2H), 7.58 – 7.55 (m, 2H), 7.47 – 7.44 (m, 2H), 7.19 – 7.15 (m, 2H), 4.92 (dd,  $J_1 = 8.0$  Hz,  $J_2 = 4.6$  Hz, 1H), 3.45 – 3.30 (m, 1H), 2.50 – 2.35 (m, 1H); <sup>19</sup>F NMR (376 MHz, CDCl<sub>3</sub>) δ - 80.9(7) to - 81.0(2) (m, 3F), - 111.5 to - 113.9 (m, 2F), - 124.3 to - 124.4 (m, 2F), - 125.9 to - 126.0 (m, 2F); <sup>13</sup>C NMR (100 MHz, CDCl<sub>3</sub>) δ 195.4, 136.3, 134.1, 132.9, 132.3, 130.4, 129.8, 129.2, 122.4, 45.2, 34.2 (t,  $J_{C-F} = 20.6$  Hz); The spectra data are consistent with the reported reference.<sup>2</sup>

**4,4,5,5,6,6,7,7,7-Nonafluoro-1,2-di-p-tolylheptan-1-one (3ae)**

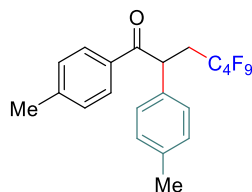

69% yield, 31.7 mg; yellow oil; <sup>1</sup>H NMR (400 MHz, CDCl<sub>3</sub>) δ 7.90 – 7.87 (m, 2H), 7.22 – 7.19 (m, 4H), 7.13 – 7.10 (m, 2H), 4.99 (dd,  $J_1 = 8.3$  Hz,  $J_2 = 4.2$  Hz, 1H), 3.51 – 3.35 (m, 1H), 2.44 – 2.36 (m, 4H), 2.28 (s, 3H); <sup>19</sup>F NMR (376 MHz, CDCl<sub>3</sub>) δ - 81.0 (t,  $J = 10.0$ , 3F), - 111.8 to - 114.1 (m, 2F), - 124.3 to - 124.5 (m, 2F), - 125.9 to - 126.0 (m, 2F); <sup>13</sup>C NMR (100 MHz, CDCl<sub>3</sub>) δ 196.5, 144.4, 137.7, 135.0, 133.2, 130.2, 129.5, 129.1, 128.0, 45.1, 34.4 (t,  $J_{C-F} = 20.2$  Hz), 21.8, 21.1; The spectra data are consistent with the reported reference.<sup>2</sup>

**4,4,5,5,6,6,7,7,7-Nonafluoro-1,2-bis(4-methoxyphenyl)heptan-1-one (3af)**

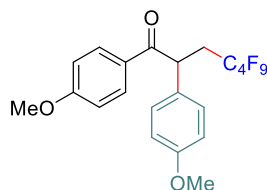

31% yield, 15.1 mg; yellow oil;  $^1\text{H}$  NMR (400 MHz,  $\text{CDCl}_3$ )  $\delta$  7.98 – 7.94 (m, 2H), 7.25 – 7.21 (m, 2H), 6.90 – 6.80 (m, 4H), 4.94 (dd,  $J_1 = 8.2$  Hz,  $J_2 = 4.4$  Hz, 1H), 3.83 (s, 3H), 3.75 (s, 3H), 3.47 – 3.31 (m, 1H), 2.47 – 2.33 (m, 1H);  $^{19}\text{F}$  NMR (376 MHz,  $\text{CDCl}_3$ )  $\delta$  - 81.0 to - 81.1 (m, 3F), - 111.8 to - 114.1 (m, 2F), - 124.4 to - 124.5 (m, 2F), - 125.9 to - 126.0 (m, 2F);  $^{13}\text{C}$  NMR (100 MHz,  $\text{CDCl}_3$ )  $\delta$  195.4, 163.8, 159.2, 131.3, 130.2, 129.2, 128.6, 114.9, 114.0, 55.6, 55.4, 44.5, 34.4 (t,  $J_{\text{C-F}} = 20.6$  Hz); The spectra data are consistent with the reported reference.<sup>2</sup>

**4,4,5,5,6,6,7,7,7-Nonafluoro-1,2-bis(4-(trifluoromethyl)phenyl)heptan-1-one (3ag)**

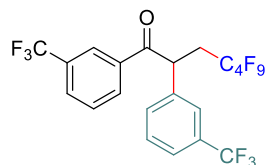

80% yield, 45.0 mg; yellow oil;  $^1\text{H}$  NMR (400 MHz,  $\text{CDCl}_3$ )  $\delta$  8.22 (s, 1H), 8.13 (d,  $J = 7.8$  Hz, 1H), 7.81 (d,  $J = 7.8$  Hz, 1H), 7.62 – 7.47 (m, 5H), 5.09 (dd,  $J_1 = 8.4$  Hz,  $J_2 = 4.4$  Hz, 1H), 3.54 – 3.38 (m, 1H), 2.56 – 2.42 (m, 1H);  $^{19}\text{F}$  NMR (376 MHz,  $\text{CDCl}_3$ )  $\delta$  - 62.8 (s, 3F), - 63.1 (s, 3F), - 81.1 (t,  $J_1 = 9.6$  Hz, 3F), - 111.5 to - 113.7 (m, 2F), - 124.3 to - 124.4 (m, 2F), - 125.9 to - 126.0 (m, 2F);  $^{13}\text{C}$  NMR (100 MHz,  $\text{CDCl}_3$ )  $\delta$  195.1, 138.0, 135.8, 132.3 (q,  $J_{\text{C-F}} = 32.5$ ), 131.9, 131.8 (q,  $J_{\text{C-F}} = 32.9$ ), 131.5, 130.4 (q,  $J_{\text{C-F}} = 3.9$ ), 130.3, 129.8, 126.5 (q,  $J_{\text{C-F}} = 245.2$  Hz), 125.8 (q,  $J_{\text{C-F}} = 3.9$  Hz), 125.4 (q,  $J_{\text{C-F}} = 3.7$  Hz), 125.0 (q,  $J_{\text{C-F}} = 3.8$  Hz), 123.8 (q,  $J_{\text{C-F}} = 270.8$  Hz), 123.6 (d,  $J_{\text{C-F}} = 278.9$  Hz), 45.7, 34.5 (t,  $J_{\text{C-F}} = 20.7$  Hz); HRMS (ESI)  $m/z$  calcd for  $\text{C}_{21}\text{H}_{12}\text{F}_{15}\text{O}^+$  [ $\text{M} + \text{H}$ ]<sup>+</sup>  $m/z$  565.0643, found  $m/z$  565.0607.

**1,2-Bis(4-chlorophenyl)-4,4,5,5,6,6,7,7,7-nonafluoro-2-methylheptan-1-one (3ah)**

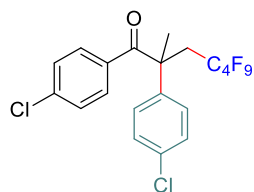

41% yield, 21.2 mg; yellow oil;  $^1\text{H}$  NMR (400 MHz,  $\text{CDCl}_3$ )  $\delta$  7.40 – 7.36 (m, 2H), 7.30 – 7.27 (m, 4H), 7.25 – 7.20 (m, 2H), 3.10 – 2.97 (m, 1H), 2.73 – 2.59 (m, 1H), 1.86 (s, 3H);  $^{19}\text{F}$  NMR (376 MHz,  $\text{CDCl}_3$ )  $\delta$  - 81.1 (t,  $J = 9.8$  Hz, 3F), - 107.4 to - 111.3 (m, 2F), - 124.6 (s, 2F), - 125.7 to - 125.8 (m, 2F);  $^{13}\text{C}$  NMR (100 MHz,  $\text{CDCl}_3$ )  $\delta$  199.9, 139.5, 138.7, 134.3, 134.0, 130.9, 129.8, 128.7, 127.8, 52.1, 39.7 (t,  $J_{\text{C-F}} = 18.3$  Hz), 22.5; The spectra data are consistent with the reported reference.<sup>2</sup>

**1,2-Bis(4-chlorophenyl)-4,4,5,5,6,6,7,7,8,8,9,9,9-tridecafluorononan-1-one (3ai)**

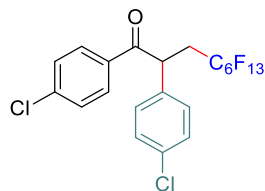

53% yield, 31.1 mg; yellow oil;  $^1\text{H}$  NMR (400 MHz,  $\text{CDCl}_3$ )  $\delta$  7.90 – 7.86 (m, 2H), 7.41 – 7.39 (m, 2H), 7.33 – 7.22 (m, 4H), 4.94 (dd,  $J_1 = 8.1$  Hz,  $J_2 = 4.6$  Hz, 1H), 3.46 – 3.31 (m, 1H), 2.50 – 2.36 (m, 1H);  $^{19}\text{F}$  NMR (376 MHz,  $\text{CDCl}_3$ )  $\delta$  - 80.6 to - 80.7 (m, 3F), - 111.2 to - 113.6 (m, 2F), - 121.6(6) to - 121.7(5) (m, 2F), - 121.8 (s, 2F), - 123.3 to - 123.4 (m, 2F), - 126.0 to - 126.1 (m, 2F);  $^{13}\text{C}$  NMR (100 MHz,  $\text{CDCl}_3$ )  $\delta$  195.3, 140.4, 135.9, 134.3, 133.7, 130.3, 129.9, 129.5, 129.3, 45.1, 34.4 (t,  $J_{\text{C-F}} = 19.3$  Hz); HRMS (ESI)  $m/z$  calcd for  $\text{C}_{21}\text{H}_{12}^{35}\text{Cl}_2\text{F}_{13}\text{O}^+$  [ $\text{M} + \text{H}$ ]<sup>+</sup>  $m/z$  597.0052, found  $m/z$  597.0066.

**2-(4-Chlorophenyl)-4,4,5,5,6,6,7,7,7-nonafluoro-1-phenylheptan-1-one (3aj)**

**1-(4-Chlorophenyl)-4,4,5,5,6,6,7,7,7-nonafluoro-2-phenylheptan-1-one (3aj')**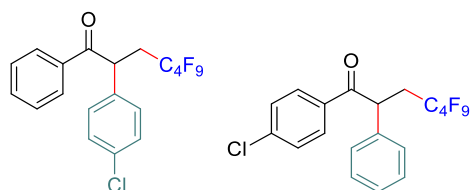

69% yield, 30.5 mg; **3i/3i'** = 3 : 1; yellow oil; <sup>1</sup>H NMR (400 MHz, CDCl<sub>3</sub>) δ major isomer 7.96 – 7.94 (m, 2H), 7.56 – 7.52 (m, 1H), 7.45 – 7.43 (overlapped, 1H), 7.41 – 7.37 (overlapped, 1H), 7.31 – 7.25 (overlapped, 4H), 5.02 (dd, *J*<sub>1</sub> = 8.0 Hz, *J*<sub>2</sub> = 4.7 Hz, 1H), 3.50 – 3.32 (overlapped, 1H), 2.51 – 2.37 (overlapped, 1H); minor isomer 7.92 – 7.89 (m, 2H), 7.45 – 7.43 (overlapped, 2H), 7.41 – 7.37 (overlapped, 1H), 7.31 – 7.25 (overlapped, 4H), 4.96 (dd, *J*<sub>1</sub> = 8.3 Hz, *J*<sub>2</sub> = 4.1 Hz, 1H), 3.50 – 3.32 (overlapped, 1H), 2.51 – 2.37 (overlapped, 1H); <sup>19</sup>F NMR (376 MHz, CDCl<sub>3</sub>) δ major isomer - 80.9 to - 81.0 (overlapped, 3F), - 111.5 to - 113.8 (overlapped, 2F), - 124.2 to - 124.3 (overlapped, 2F), - 125.8 to - 125.9 (overlapped, 2F); minor isomer - 80.9 to - 81.0 (overlapped, 3F), - 111.5 to - 113.8 (overlapped, 2F), - 124.2 to - 124.3 (overlapped, 2F), - 125.8 to - 125.9 (overlapped, 2F); <sup>13</sup>C NMR (100 MHz, CDCl<sub>3</sub>) δ major isomer 196.5, 136.2, 135.5, 134.1, 133.8, 129.8, 129.6, 129.0, 128.1, 45.0, 34.4 (overlapped, *J*<sub>C-F</sub> = 20.9 Hz); minor isomer 195.6, 140.1, 137.5, 134.0, 130.4, 129.7, 129.2, 128.8, 128.2, 45.8, 34.4 (overlapped, *J*<sub>C-F</sub> = 20.9 Hz); The spectra data are consistent with the reported reference.<sup>2</sup>

**2-(3,4-Dichlorophenyl)-4,4,5,5,6,6,7,7,7-nonafluoro-1-phenylheptan-1-one (3ak)****1-(3,4-Dichlorophenyl)-4,4,5,5,6,6,7,7,7-nonafluoro-2-phenylheptan-1-one (3ak')**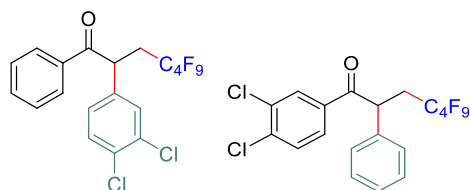

77% yield, 38.1 mg; **3j/3j'** = 6 : 1; yellow oil; <sup>1</sup>H NMR (400 MHz, CDCl<sub>3</sub>) δ major isomer 7.97 – 7.90 (m, 2H), 7.59 – 7.50 (m, 1H), 7.47 – 7.39 (overlapped, 4H), 7.20 – 7.17 (m, 1H), 5.00 (dd, *J*<sub>1</sub> = 8.0 Hz, *J*<sub>2</sub> = 4.7 Hz, 1H), 3.45 – 3.30 (overlapped, 1H), 2.52 – 2.38 (overlapped, 1H); minor isomer 8.04 (d, *J*<sub>1</sub> = 2.0 Hz, 1H), 7.79 – 7.76 (m, 1H), 7.52 – 7.50 (m, 1H), 7.47 – 7.39 (overlapped, 4H), 7.30 – 7.29 (m, 1H), 4.91 (dd, *J*<sub>1</sub> = 8.5 Hz, *J*<sub>2</sub> = 4.1 Hz, 1H), 3.45 – 3.30 (overlapped, 1H), 2.52 – 2.38 (overlapped, 1H); <sup>19</sup>F NMR (376 MHz, CDCl<sub>3</sub>) δ major isomer - 80.9 to - 81.0 (overlapped, 3F), - 111.5 to - 113.8 (overlapped, 2F), - 124.2 to - 124.3 (overlapped, 2F), - 125.8 to - 126.0 (overlapped, 2F); minor isomer - 80.9 to - 81.0 (overlapped, 3F), - 111.5 to - 113.8 (overlapped, 2F), - 124.2 to - 124.3 (overlapped, 2F), - 125.8 to - 126.0 (overlapped, 2F); <sup>13</sup>C NMR (100 MHz, CDCl<sub>3</sub>) δ major isomer 196.1, 137.7, 135.2, 134.0, 133.7, 132.6, 131.5, 130.1, 129.1, 128.9, 127.5, 44.6, 34.4 (t, *J*<sub>C-F</sub> = 20.6 Hz); HRMS (ESI) *m/z* calcd for C<sub>19</sub>H<sub>12</sub><sup>35</sup>Cl<sub>2</sub>F<sub>9</sub>O<sup>+</sup> [M + H]<sup>+</sup> *m/z* 497.0116, found *m/z* 497.0123.

**2-(4-Chlorophenyl)-4,4,5,5,6,6,7,7,7-nonafluoro-1-(4-methoxyphenyl)heptan-1-one (3al)****1-(4-Chlorophenyl)-4,4,5,5,6,6,7,7,7-nonafluoro-2-(4-methoxyphenyl)heptan-1-one (3al')**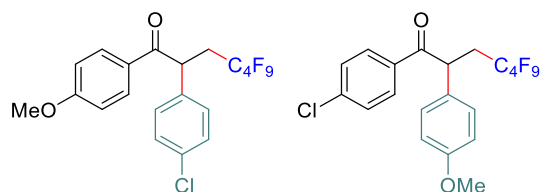

43% yield, 21.4 mg, **3j/3j'** = 14 : 1; yellow oil; <sup>1</sup>H NMR (400 MHz, CDCl<sub>3</sub>) δ major isomer 7.96 – 7.91 (m, 2H), 7.30 – 7.25 (m, 4H), 6.91 – 6.88 (overlapped, 2H), 4.96 (dd, *J*<sub>1</sub> = 7.9 Hz, *J*<sub>2</sub> = 4.7 Hz, 1H), 3.84 (s, 1H), 3.45 – 3.30 (overlapped, 1H), 2.50 – 2.35 (overlapped, 1H); minor isomer 7.91 – 7.89 (m, 2H), 7.39 – 7.37 (m, 2H), 7.21 – 7.18 (m, 2H), 6.85 – 6.83 (m, 2H), 7.30 – 7.29 (m, 1H), 4.91 (dd, *J*<sub>1</sub> = 8.2 Hz, *J*<sub>2</sub> = 4.7 Hz, 1H), 3.76 (s, 1H), 3.45 – 3.30 (overlapped, 1H), 2.50 – 2.35 (overlapped, 1H); <sup>19</sup>F NMR (376 MHz, CDCl<sub>3</sub>) δ major isomer - 80.9(9) to - 81.0(4) (overlapped, 3F), - 111.6 to - 114.1 (overlapped, 2F), - 124.3(5) to - 124.4(3) (overlapped, 2F), - 125.9 to - 126.0 (overlapped, 2F); minor isomer - 80.9(9) to - 81.0(4) (overlapped, 3F), - 111.6 to - 114.1 (overlapped, 2F), - 124.3(5) to - 124.4(3) (overlapped, 2F), - 125.9 to - 126.0 (overlapped, 2F); <sup>13</sup>C NMR (100 MHz, CDCl<sub>3</sub>) δ 194.9, 164.0, 136.7, 133.9, 131.3, 129.7, 129.5, 128.3, 114.1, 55.6, 44.6, 34.3 (t, *J*<sub>C-F</sub> = 20.5 Hz); HRMS (ESI) *m/z* calcd for C<sub>20</sub>H<sub>15</sub><sup>35</sup>ClF<sub>9</sub>O<sub>2</sub><sup>+</sup> [M + H]<sup>+</sup> *m/z* 493.0611, found *m/z* 493.0610.

**4,4,5,5,6,6,7,7,7-Nonafluoro-1-phenyl-2-(pyridin-2-yl)heptan-1-one (3am)**

**4,4,5,5,6,6,7,7,7-Nonafluoro-2-phenyl-1-(pyridin-3-yl)heptan-1-one (3am')**

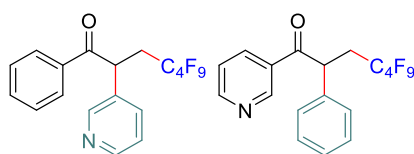

71% yield, 30.5 mg; **3i/3i'** = 3 : 1; yellow oil; <sup>1</sup>H NMR (400 MHz, CDCl<sub>3</sub>) δ major isomer 8.66 (d, *J* = 2.4 Hz, 1H), 8.52 – 8.50 (m, 1H), 7.78 – 7.75 (overlapped, 1H), 7.65 – 7.62 (m, 1H), 7.58 – 7.53 (m, 1H), 7.46 – 7.42 (m, 2H), 7.38 – 7.25 (overlapped, 2H), 5.09 (dd, *J*<sub>1</sub> = 8.2 Hz, *J*<sub>2</sub> = 5.0 Hz, 1H), 3.54 – 3.33 (overlapped, 1H), 2.56 – 2.39 (overlapped, 1H); minor isomer 9.18 (d, *J* = 1.7 Hz, 1H), 8.72 – 8.70 (m, 1H), 8.24 – 8.21 (overlapped, 1H), 7.98 – 7.95 (overlapped, 2H), 7.38 – 7.25 (overlapped, 4H), 4.97 (dd, *J*<sub>1</sub> = 8.4 Hz, *J*<sub>2</sub> = 4.0 Hz, 1H), 3.54 – 3.33 (overlapped, 1H), 2.56 – 2.39 (overlapped, 1H); <sup>19</sup>F NMR (376 MHz, CDCl<sub>3</sub>) δ major isomer - 81.0 (overlapped, *J* = 10.5 Hz, 3F), - 111.5 to - 113.8 (overlapped, 2F), - 124.3 to - 124.4 (overlapped, 2F), - 125.9 to - 126.0 (overlapped, 2F); minor isomer - 81.0 (overlapped, *J* = 10.5 Hz, 3F), - 111.5 to - 113.8 (overlapped, 2F), - 124.3 to - 124.4 (overlapped, 2F), - 125.9 to - 126.0 (overlapped, 2F); <sup>13</sup>C NMR (100 MHz, CDCl<sub>3</sub>) δ major isomer 196.2, 149.8, 149.4, 136.3, 135.3, 134.0, 129.8, 129.1, 128.2, 124.3, 42.9, 34.3 (t, *J*<sub>C-F</sub> = 20.4 Hz); minor isomer 195.7, 153.8, 150.2, 136.8, 135.1, 133.6, 131.1, 128.9, 128.4, 123.8, 46.3, 34.2 (t, *J*<sub>C-F</sub> = 21.1 Hz); The spectra data are consistent with the reported reference.<sup>2</sup>

**4,4,5,5,6,6,7,7,7-nonafluoro-2-(furan-2-yl)-1-(p-tolyl)heptan-1-one (3an)**

**4,4,5,5,6,6,7,7,7-nonafluoro-1-(furan-2-yl)-2-(p-tolyl)heptan-1-one (3an')**

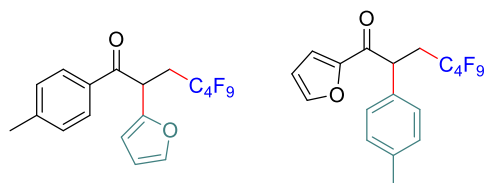

40% yield, 17.3 mg; **3an/3an'** = 10 : 1; yellow oil; spectre date of the major one; <sup>1</sup>H NMR (400 MHz, CDCl<sub>3</sub>) δ 7.91 – 7.89 (m, 2H), 7.33 – 7.32 (m, 1H), 7.26 – 7.23 (m, 2H), 6.27 – 6.26 (m, 1H), 6.15 – 6.14 (m, 1H), 5.14 (dd, *J*<sub>1</sub> = 7.8 Hz, *J*<sub>2</sub> = 5.0 Hz, 1H), 3.36 – 3.21 (m, 1H), 2.69 – 2.54 (m, 1H), 2.39 (s, 3H); <sup>19</sup>F NMR (376 MHz, CDCl<sub>3</sub>) δ - 80.9 to - 81.0 (m, 3F), - 113.1 to - 113.4 (m, 2F), - 124.2(5) to - 124.3(3) (m, 2F), - 125.8 to - 125.9 (m, 2F); <sup>13</sup>C NMR (100 MHz, CDCl<sub>3</sub>) δ 193.8, 150.3, 144.9, 142.8, 132.8, 129.6, 129.1, 111.1, 108.2, 39.2, 31.9 (t, *J*<sub>C-F</sub> = 20.4 Hz), 21.8; HRMS (ESI) *m/z* calcd for C<sub>18</sub>H<sub>14</sub>F<sub>9</sub>O<sub>2</sub><sup>+</sup> [M + H]<sup>+</sup> *m/z* 433.0839, found *m/z* 433.0835.



### 4,4,5,5,6,6,7,7,7-Nonafluoro-1-phenyl-2-(thiophen-3-yl)heptan-1-one (3ao)

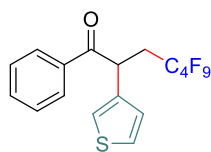

40% yield, 17.3 mg; yellow oil;  $^1\text{H NMR}$  (400 MHz,  $\text{CDCl}_3$ )  $\delta$  8.03 – 8.00 (m, 2H), 7.59 – 7.54 (m, 1H), 7.48 – 7.44 (m, 2H), 7.23 – 7.21 (m, 1H), 6.96 – 6.91 (m, 2H), 5.34 (dd,  $J_1 = 8.9$  Hz,  $J_2 = 3.8$  Hz, 1H), 3.55 – 3.40 (m, 1H), 2.62 – 2.48 (m, 1H);  $^{19}\text{F NMR}$  (376 MHz,  $\text{CDCl}_3$ )  $\delta$  - 80.9 to - 81.0 (m, 3F), - 112.7 to - 113.1 (m, 2F), - 124.3 to - 124.4 (m, 2F), - 125.9 to - 126.0 (m, 2F);  $^{13}\text{C NMR}$  (100 MHz,  $\text{CDCl}_3$ )  $\delta$  195.6, 139.5, 135.3, 133.8, 129.2, 129.0, 127.6, 126.6, 126.1, 40.2, 35.1 (t,  $J_{\text{C-F}} = 21.4$  Hz); HRMS (ESI)  $m/z$  calcd for  $\text{C}_{17}\text{H}_{12}\text{F}_9\text{OS}^+$   $[\text{M} + \text{H}]^+$   $m/z$  435.0460, found  $m/z$  435.0431.

### 3-(4-Chlorophenyl)-5,5,6,6,7,7,8,8,8-nonafluorooctan-2-one (3ap)

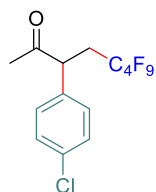

31% yield, 12.4 mg; yellow oil;  $^1\text{H NMR}$  (400 MHz,  $\text{CDCl}_3$ )  $\delta$  7.37 – 7.33 (m, 2H), 7.19 – 7.15 (m, 2H), 4.06 (dd,  $J_1 = 7.0$  Hz,  $J_2 = 5.5$  Hz, 1H), 3.27 – 3.11 (m, 1H), 2.35 – 2.12 (m, 1H);  $^{19}\text{F NMR}$  (376 MHz,  $\text{CDCl}_3$ )  $\delta$  - 80.9 (t,  $J = 10.2$  Hz, 3F), - 111.5 to - 114.3 (m, 2F), - 124.3 to - 124.4 (m, 2F), 125.8 to - 125.9 (m, 2F);  $^{13}\text{C NMR}$  (100 MHz,  $\text{CDCl}_3$ )  $\delta$  204.4, 135.7, 134.4, 129.8, 129.5, 50.7, 32.9 (t,  $J_{\text{C-F}} = 20.4$  Hz), 28.9; HRMS (ESI)  $m/z$  calcd for  $\text{C}_{14}\text{H}_{10}^{35}\text{ClF}_9\text{ONa}^+$   $[\text{M} + \text{Na}]^+$   $m/z$  423.0169, found  $m/z$  423.0109.

### Ethyl 4,5-bis(4-chlorophenyl)-2,2-difluoro-5-oxopentanoate (3ba)

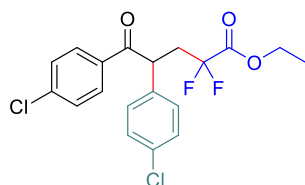

88% yield, 35.2 mg; yellow oil;  $^1\text{H NMR}$  (400 MHz,  $\text{CDCl}_3$ )  $\delta$  7.87– 7.85 (m, 2H), 7.40 – 7.37 (m, 2H), 7.29 – 7.25 (m, 2H), 7.22 – 7.19 (m, 2H), 4.88 (dd,  $J_1 = 7.8$  Hz,  $J_2 = 5.1$  Hz, 1H), 4.24 – 4.07 (m, 2H), 3.30 – 3.15 (m, 1H), 2.55 – 2.42 (m, 1H), 1.26 (t,  $J = 7.2$  Hz, 3H);  $^{19}\text{F NMR}$  (376 MHz,  $\text{CDCl}_3$ )  $\delta$  - 104.9 to - 105.0 (m, 2F);  $^{13}\text{C NMR}$  (100 MHz,  $\text{CDCl}_3$ )  $\delta$  196.0, 163.8 (t,  $J_{\text{C-F}} = 32.0$  Hz), 140.1, 136.1, 134.1 134.0, 130.3, 129.7 (two peaks overlapped), 129.2, 115.2 (t,  $J_{\text{C-F}} = 249.5$  Hz), 63.2, 46.3 (t,  $J_{\text{C-F}} = 3.3$  Hz), 38.1 (t,  $J_{\text{C-F}} = 23.0$  Hz), 13.9; The spectra data are consistent with the reported reference.<sup>3</sup>

### Hexyl 4,5-bis(4-chlorophenyl)-2,2-difluoro-5-oxopentanoate (3bb)

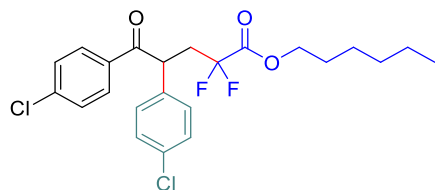

77% yield, 35.1 mg; yellow oil;  $^1\text{H NMR}$  (400 MHz,  $\text{CDCl}_3$ )  $\delta$  7.87 – 7.84 (m, 2H), 7.39 – 7.36 (m, 2H), 7.28 – 7.25 (m, 2H), 7.22 – 7.19 (m, 2H), 4.87 (dd,  $J_1 = 7.8$  Hz,  $J_2 = 5.2$  Hz, 1H), 4.16 – 3.99 (m, 2H), 3.29 – 3.15 (m, 1H), 2.55 – 2.42 (m, 1H), 1.65 – 1.54 (m, 2H), 1.34 – 1.22 (m, 7H), 0.90 – 0.86 (m, 2H);

$^{19}\text{F}$  NMR (376 MHz,  $\text{CDCl}_3$ )  $\delta$  - 104.3 to - 104.4 (m, 2F);  $^{13}\text{C}$  NMR (100 MHz,  $\text{CDCl}_3$ )  $\delta$  195.9, 163.8 (t,  $J_{\text{C-F}} = 31.8$  Hz), 140.1, 136.1, 134.0, 133.9, 130.3, 129.7 (two peaks overlapped), 129.2, 115.2 (t,  $J_{\text{C-F}} = 249.6$  Hz), 67.3, 46.3 (t,  $J_{\text{C-F}} = 3.6$  Hz), 38.1 (t,  $J_{\text{C-F}} = 23.1$  Hz), 31.4, 28.2, 25.4, 22.6, 14.1; HRMS (ESI)  $m/z$  calcd for  $\text{C}_{23}\text{H}_{25}^{35}\text{Cl}_2\text{F}_2\text{O}_3^+$   $[\text{M} + \text{H}]^+$   $m/z$  457.1143, found  $m/z$  457.1161.

**Cyclopentyl 4,5-bis(4-chlorophenyl)-2,2-difluoro-5-oxopentanoate (3bc)**

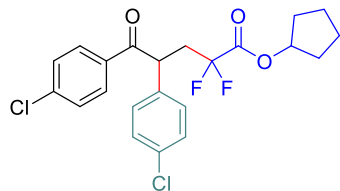

75% yield, 33.0 mg; yellow oil;  $^1\text{H}$  NMR (400 MHz,  $\text{CDCl}_3$ )  $\delta$  7.87 – 7.84 (m, 2H), 7.38 – 7.36 (m, 2H), 7.28 – 7.25 (m, 2H), 7.22 – 7.19 (m, 2H), 5.14 – 5.10 (m, 1H), 4.87 (dd,  $J_1 = 7.8$  Hz,  $J_2 = 5.2$  Hz, 1H), 3.27 – 3.13 (m, 1H), 2.53 – 2.40 (m, 1H), 1.88 – 1.54 (m, 8H);  $^{19}\text{F}$  NMR (376 MHz,  $\text{CDCl}_3$ )  $\delta$  - 104.3 to - 104.5 (m, 2F);  $^{13}\text{C}$  NMR (100 MHz,  $\text{CDCl}_3$ )  $\delta$  196.0, 163.6 (t,  $J_{\text{C-F}} = 32.1$  Hz), 140.1, 136.2, 134.0(1), 133.9(7), 130.3, 129.6 (two peaks overlapped), 129.2, 115.2 (t,  $J_{\text{C-F}} = 249.7$  Hz), 80.7, 46.3 (t,  $J_{\text{C-F}} = 3.7$  Hz), 38.0 (t,  $J_{\text{C-F}} = 23.1$  Hz), 32.6, 32.5, 23.8, 23.7; HRMS (ESI)  $m/z$  calcd for  $\text{C}_{22}\text{H}_{20}^{35}\text{Cl}_2\text{F}_2\text{O}_3\text{Na}^+$   $[\text{M} + \text{Na}]^+$   $m/z$  463.0650, found  $m/z$  463.0655.

**Benzyl 4,5-bis(4-chlorophenyl)-2,2-difluoro-5-oxopentanoate (3bd)**

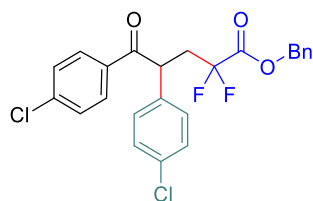

56% yield, 26.0 mg; yellow oil;  $^1\text{H}$  NMR (400 MHz,  $\text{CDCl}_3$ )  $\delta$  7.81 – 7.78 (m, 2H), 7.38 – 7.30 (m, 7H), 7.24 – 7.22 (m, 2H), 7.16 – 7.12 (m, 2H), 5.19 – 5.04 (m, 2H), 4.81 (dd,  $J_1 = 7.9$  Hz,  $J_2 = 5.1$  Hz, 1H), 3.30 – 3.16 (m, 1H), 2.55 – 2.42 (m, 1H);  $^{19}\text{F}$  NMR (376 MHz,  $\text{CDCl}_3$ )  $\delta$  - 104.1 (t,  $J = 16.3$  Hz, 2F);  $^{13}\text{C}$  NMR (100 MHz,  $\text{CDCl}_3$ )  $\delta$  195.9, 163.6 (t,  $J_{\text{C-F}} = 32.9$  Hz), 140.1, 136.0, 134.1, 134.0, 133.9, 130.3, 129.6(4), 129.6(0), 129.2, 129.0, 128.9, 128.7, 115.2 (t,  $J_{\text{C-F}} = 249.8$  Hz), 68.6, 46.3 (t,  $J_{\text{C-F}} = 3.8$  Hz), 38.1 (t,  $J_{\text{C-F}} = 23.1$  Hz); HRMS (ESI)  $m/z$  calcd for  $\text{C}_{24}\text{H}_{19}^{35}\text{Cl}_2\text{F}_2\text{O}_3^+$   $[\text{M} + \text{H}]^+$   $m/z$  463.0674, found  $m/z$  463.0690.

**4,5-Bis(4-chlorophenyl)-N-cyclopropyl-2,2-difluoro-5-oxopentanamide (3be)**

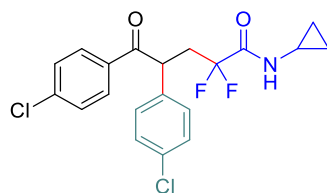

66% yield, 27.1 mg; white solid; mp. 133–135 °C;  $^1\text{H}$  NMR (400 MHz,  $\text{CDCl}_3$ )  $\delta$  7.89 – 7.86 (m, 2H), 7.39 – 7.36 (m, 2H), 7.27 – 7.24 (m, 2H), 7.22 – 7.18 (m, 2H), 6.34 (s, 1H), 4.99 (dd,  $J_1 = 8.4$  Hz,  $J_2 = 4.4$  Hz, 1H), 3.24 – 3.18 (m, 1H), 2.70 – 2.66 (m, 1H), 2.53 – 2.47 (m, 1H), 0.83 – 0.80 (m, 2H), 0.55 – 0.54 (m, 2H);  $^{19}\text{F}$  NMR (376 MHz,  $\text{CDCl}_3$ )  $\delta$  - 104.2 to - 104.3 (m, 2F);  $^{13}\text{C}$  NMR (100 MHz,  $\text{CDCl}_3$ )  $\delta$  196.2, 165.1 (t,  $J_{\text{C-F}} = 28.1$  Hz), 139.9, 136.4, 134.1, 133.8, 130.3, 129.6, 129.5, 129.1, 116.8 (t,  $J_{\text{C-F}} = 252.0$  Hz), 46.2 (t,  $J_{\text{C-F}} = 3.6$  Hz), 37.6 (t,  $J_{\text{C-F}} = 23.0$  Hz), 22.6, 6.5(3), 6.5(1); HRMS (ESI)  $m/z$  calcd for  $\text{C}_{20}\text{H}_{18}^{35}\text{Cl}_2\text{F}_2\text{NO}_2^+$   $[\text{M} + \text{H}]^+$   $m/z$  412.0677, found  $m/z$  412.0671.

**4,5-Bis(4-chlorophenyl)-2,2-difluoro-5-oxo-N-phenylpentanamide (3bf)**

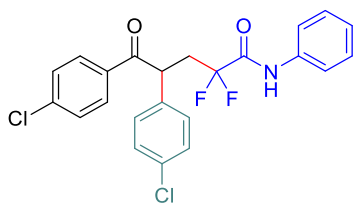

88% yield, 39.6 mg; yellow oil;  $^1\text{H}$  NMR (400 MHz,  $\text{CDCl}_3$ )  $\delta$  7.91 – 7.87 (m, 3H), 7.59 – 7.47 (m, 3H), 7.38 – 7.33 (m, 4H), 7.27 – 7.17 (m, 4H), 5.02 (dd,  $J_1 = 8.3$  Hz,  $J_2 = 4.8$  Hz, 1H), 3.39 – 3.24 (m, 1H), 2.71 – 2.58 (m, 1H);  $^{19}\text{F}$  NMR (376 MHz,  $\text{CDCl}_3$ )  $\delta$  - 103.5 (t,  $J = 16.8$  Hz, 2F);  $^{13}\text{C}$  NMR (100 MHz,  $\text{CDCl}_3$ )  $\delta$  196.2, 161.6 (t,  $J = 28.0$  Hz), 140.1, 136.2, 135.8, 134.1, 134.0, 130.3, 129.6(2), 129.6(0), 129.4, 129.2, 125.9, 120.4, 117.0 (t,  $J_{\text{C-F}} = 253.3$  Hz), 46.3 (t,  $J_{\text{C-F}} = 3.7$  Hz), 37.6 (t,  $J_{\text{C-F}} = 22.7$  Hz); HRMS (ESI)  $m/z$  calcd for  $\text{C}_{23}\text{H}_{18}^{35}\text{Cl}_2\text{F}_2\text{NO}_2^+$   $[\text{M} + \text{H}]^+$   $m/z$  448.0677, found  $m/z$  448.0673.

***N*-(4-Bromophenyl)-4,5-bis(4-chlorophenyl)-2,2-difluoro-5-oxopentanamide (3bg)**

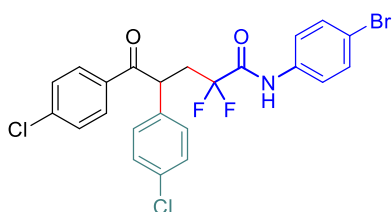

99% yield, 52.0 mg; yellow oil;  $^1\text{H}$  NMR (400 MHz,  $\text{CDCl}_3$ )  $\delta$  7.91 (s, 1H), 7.88 – 7.85 (m, 2H), 7.48 – 7.44 (m, 2H), 7.39 – 7.35 (m, 4H), 7.26 – 7.20 (m, 4H), 4.99 (dd,  $J_1 = 8.3$  Hz,  $J_2 = 4.9$  Hz, 1H), 3.37 – 3.23 (m, 5H), 2.70 – 2.56 (m, 1H);  $^{19}\text{F}$  NMR (376 MHz,  $\text{CDCl}_3$ )  $\delta$  - 104.9 to - 105.0 (m, 1F), - 105.2 – - 105.3 (m, 1F);  $^{13}\text{C}$  NMR (100 MHz,  $\text{CDCl}_3$ )  $\delta$  196.1, 161.7 (t,  $J_{\text{C-F}} = 28.8$  Hz), 140.1, 136.1, 134.9, 134.1, 134.0, 132.4, 130.3, 129.7, 129.6, 129.2, 121.9, 118.7, 116.9 (t,  $J_{\text{C-F}} = 253.7$  Hz), 46.3, 37.6 (t,  $J_{\text{C-F}} = 23.3$  Hz); HRMS (ESI)  $m/z$  calcd for  $\text{C}_{23}\text{H}_{17}^{79}\text{Br}^{35}\text{Cl}_2\text{F}_2\text{NO}_2^+$   $[\text{M} + \text{H}]^+$   $m/z$  525.9782, found  $m/z$  525.9785.

***N*-(3s,5s,7s)-Adamantan-1-yl)-4,5-bis(4-chlorophenyl)-2,2-difluoro-5-oxopentanamide (3bh)**

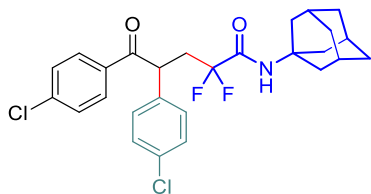

83% yield, 42.0 mg; white oil;  $^1\text{H}$  NMR (400 MHz,  $\text{CDCl}_3$ )  $\delta$  7.89 – 7.86 (m, 2H), 7.39 – 7.36 (m, 2H), 7.27 – 7.24 (m, 2H), 7.22 – 7.20 (m, 2H), 5.90 (s, 1H), 4.97 (dd,  $J_1 = 8.3$  Hz,  $J_2 = 4.4$  Hz, 1H), 3.23 – 3.13 (m, 1H), 2.55 – 2.42 (m, 1H), 2.08 (s, 3H), 1.95 (d,  $J = 3.0$ , 6H), 1.67 (t,  $J = 3.1$ , 6H);  $^{19}\text{F}$  NMR (376 MHz,  $\text{CDCl}_3$ )  $\delta$  - 103.6 to - 103.8 (m, 2F);  $^{13}\text{C}$  NMR (100 MHz,  $\text{CDCl}_3$ )  $\delta$  196.3, 162.6 (t,  $J_{\text{C-F}} = 27.7$  Hz), 139.9, 136.5, 134.3, 133.8, 130.3, 129.6, 129.5, 129.1, 116.7 (t,  $J_{\text{C-F}} = 253.3$  Hz), 52.7, 46.3 (t,  $J_{\text{C-F}} = 3.8$  Hz), 41.2, 37.6 (t,  $J_{\text{C-F}} = 23.9$  Hz), 36.2, 29.4; HRMS (ESI)  $m/z$  calcd for  $\text{C}_{27}\text{H}_{28}^{35}\text{Cl}_2\text{F}_2\text{NO}_2^+$   $[\text{M} + \text{H}]^+$   $m/z$  506.1460, found  $m/z$  506.1456.

***N,N*-Dibutyl-4,5-bis(4-chlorophenyl)-2,2-difluoro-5-oxopentanamide (3bi)**

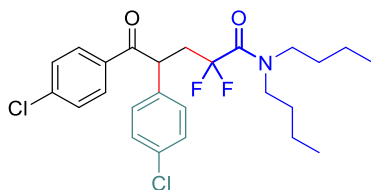

78% yield, 37.6 mg; white oil;  $^1\text{H}$  NMR (400 MHz,  $\text{CDCl}_3$ )  $\delta$  7.89 – 7.86 (m, 2H), 7.39 – 7.36 (m, 2H), 7.27 – 7.22 (m, 4H), 4.98 (dd,  $J_1 = 8.6$  Hz,  $J_2 = 3.8$  Hz, 1H), 3.44 – 3.26 (m, 5H), 2.58 – 2.45 (m, 1H), 1.55 – 1.46 (m, 4H), 1.32 – 1.24 (m, 4H), 0.91 (q,  $J = 7.3$  Hz, 6H);  $^{19}\text{F}$  NMR (376 MHz,  $\text{CDCl}_3$ )  $\delta$  - 97.6 to - 97.7 (m, 1F), - 97.9 to - 98.0 (m, 1F);  $^{13}\text{C}$  NMR (100 MHz,  $\text{CDCl}_3$ )  $\delta$  196.6, 162.6 (t,  $J_{\text{C-F}} = 41.6$  Hz), 139.8, 137.0, 134.4, 133.6, 130.3, 129.6, 129.5, 129.1, 118.7 (t,  $J_{\text{C-F}} = 239.0$  Hz), 47.5 (t,  $J_{\text{C-F}} = 6.5$  Hz), 47.0, 46.4 (t,  $J_{\text{C-F}} = 4.2$  Hz), 38.7 (t,  $J_{\text{C-F}} = 22.7$  Hz), 31.1, 29.2, 20.3, 20.0, 13.9, 13.8; HRMS (ESI)  $m/z$  calcd for  $\text{C}_{25}\text{H}_{30}^{35}\text{Cl}_2\text{F}_2\text{NO}_2^+$   $[\text{M} + \text{H}]^+$   $m/z$  484.1616, found  $m/z$  484.1615.

**4,5-Bis(4-chlorophenyl)-2,2-difluoro-1-(pyrrolidin-1-yl)pentane-1,5-dione (3bj)**

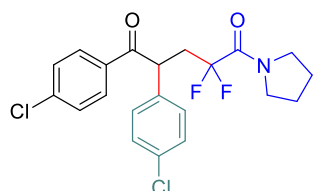

55% yield, 23.4 mg; yellow oil;  $^1\text{H}$  NMR (400 MHz,  $\text{CDCl}_3$ )  $\delta$  7.89 – 7.85 (m, 2H), 7.39 – 7.35 (m, 2H), 7.27 – 7.21 (m, 4H), 4.99 (dd,  $J_1 = 8.8$  Hz,  $J_2 = 4.0$  Hz, 1H), 3.64 – 3.60 (m, 2H), 3.48 – 3.42 (m, 2H), 3.39 – 3.27 (m, 1H), 2.57 – 2.43 (m, 1H), 1.96 – 1.91 (m, 2H), 1.85 – 1.81 (m, 2H);  $^{19}\text{F}$  NMR (376 MHz,  $\text{CDCl}_3$ )  $\delta$  - 101.1 (t,  $J = 18.2$  Hz, 1F), -101.5 (t,  $J = 18.2$  Hz, 1F);  $^{13}\text{C}$  NMR (100 MHz,  $\text{CDCl}_3$ )  $\delta$  196.6, 161.8 (t,  $J_{\text{C-F}} = 29.4$  Hz), 139.9, 136.8, 134.4, 133.7, 130.3, 129.6, 129.5, 129.1, 118.0 (t,  $J_{\text{C-F}} = 251.8$  Hz), 47.5, 46.7 (t,  $J_{\text{C-F}} = 5.8$  Hz), 46.4 (t,  $J_{\text{C-F}} = 3.3$  Hz), 38.0 (t,  $J_{\text{C-F}} = 22.9$  Hz), 26.6, 23.4; HRMS (ESI)  $m/z$  calcd for  $\text{C}_{21}\text{H}_{20}^{35}\text{Cl}_2\text{F}_2\text{NO}_2^+$   $[\text{M} + \text{H}]^+$   $m/z$  426.0834, found  $m/z$  426.0832.

**4,5-Bis(4-chlorophenyl)-2,2-difluoro-1-(piperidin-1-yl)pentane-1,5-dione (3bk)**

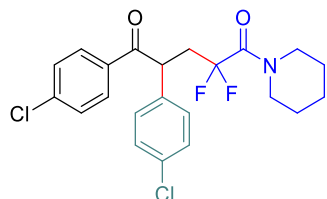

65% yield, 28.8 mg; yellow oil;  $^1\text{H}$  NMR (400 MHz,  $\text{CDCl}_3$ )  $\delta$  7.89 – 7.86 (m, 2H), 7.39 – 7.36 (m, 2H), 7.28 – 7.22 (m, 4H), 4.97 (dd,  $J_1 = 8.6$  Hz,  $J_2 = 3.8$  Hz, 1H), 3.59 – 3.46 (m, 4H), 3.44 – 3.35 (m, 1H), 2.57 – 2.43 (m, 1H), 1.68 – 1.54 (m, 7H);  $^{19}\text{F}$  NMR (376 MHz,  $\text{CDCl}_3$ )  $\delta$  - 98.1 (t,  $J = 17.7$ , 1F), - 98.2 (t,  $J = 17.7$ , 1F);  $^{13}\text{C}$  NMR (100 MHz,  $\text{CDCl}_3$ )  $\delta$  196.7, 161.4 (t,  $J_{\text{C-F}} = 28.3$  Hz), 139.9, 137.0, 134.4, 133.7, 130.3, 129.6, 129.5, 129.1, 118.8 (t,  $J_{\text{C-F}} = 253.5$  Hz), 47.0 (t,  $J_{\text{C-F}} = 6.5$  Hz), 46.4 (t,  $J_{\text{C-F}} = 3.3$  Hz), 44.6, 38.6 (t,  $J_{\text{C-F}} = 22.7$  Hz), 26.5, 25.7, 24.5; HRMS (ESI)  $m/z$  calcd for  $\text{C}_{22}\text{H}_{22}^{35}\text{Cl}_2\text{F}_2\text{NO}_2^+$   $[\text{M} + \text{H}]^+$   $m/z$  440.0990, found  $m/z$  440.0982.

***tert*-Butyl 4-(4,5-bis(4-chlorophenyl)-2,2-difluoro-5-oxopentanoyl)piperazine-1-carboxylate (3bl)**

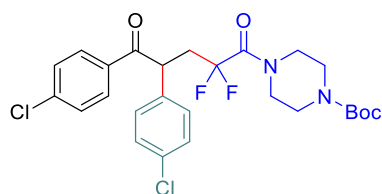

65% yield, 35.2 mg; white solid; mp. 124–126 °C;  $^1\text{H}$  NMR (400 MHz,  $\text{CDCl}_3$ )  $\delta$  7.88 – 7.85 (m, 2H), 7.39 – 7.35 (m, 2H), 7.27 – 7.21 (m, 4H), 4.94 (dd,  $J_1 = 8.7$  Hz,  $J_2 = 3.7$  Hz, 1H), 3.75 – 3.72 (m, 2H), 3.63 (t,  $J = 5.3$  Hz, 2H), 3.55 (t,  $J = 5.5$  Hz, 2H), 3.50 – 3.38 (m, 3H), 2.56 – 2.43 (m, 1H), 1.46 (s, 9H);  $^{19}\text{F}$  NMR (376 MHz,  $\text{CDCl}_3$ )  $\delta$  - 97.5 to - 97.8 (m, 2F);  $^{13}\text{C}$  NMR (100 MHz,  $\text{CDCl}_3$ )  $\delta$  196.4, 161.8 (t,

$J_{C-F} = 28.8$  Hz), 154.5, 140.0, 136.8, 134.2, 133.8, 130.3, 129.6, 129.5, 129.1, 118.5 (t,  $J_{C-F} = 253.4$  Hz), 80.6, 46.3 (t,  $J_{C-F} = 3.4$  Hz), 45.8 (t,  $J_{C-F} = 4.9$  Hz), 43.1, 38.4 (t,  $J_{C-F} = 22.6$  Hz), 28.5; HRMS (ESI)  $m/z$  calcd for  $C_{26}H_{28}^{35}Cl_2F_2N_2O_4Na^+$   $[M + Na]^+$   $m/z$  563.1286, found  $m/z$  563.1296.

**4,5-Bis(4-chlorophenyl)-2,2-difluoro-1-(4-(pyrimidin-2-yl)piperazin-1-yl)pentane-1,5-dione (3bm)**

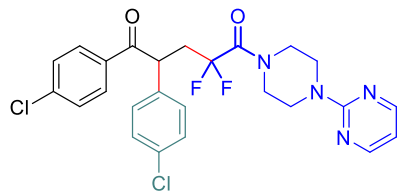

78% yield, 40.0 mg; yellow oil;  $^1H$  NMR (400 MHz,  $CDCl_3$ )  $\delta$  8.33 (d,  $J = 4.7$  Hz, 2H), 7.89 – 7.86 (m, 2H), 7.39 – 7.35 (m, 2H), 7.28 – 7.22 (m, 4H), 6.55 (t,  $J = 4.7$  Hz, 1H), 4.97 (dd,  $J_1 = 8.6$  Hz,  $J_2 = 3.7$  Hz, 1H), 3.93 – 3.81 (m, 4H), 3.74 (t,  $J = 5.1$  Hz, 2H), 3.67 (t,  $J = 5.2$  Hz, 2H), 3.50 – 3.35 (m, 1H), 2.56 – 2.50 (m, 1H);  $^{19}F$  NMR (376 MHz,  $CDCl_3$ )  $\delta$  - 98.0 to - 98.3 (m, 2F);  $^{13}C$  NMR (100 MHz,  $CDCl_3$ )  $\delta$  196.4, 161.8 (t,  $J_{C-F} = 28.6$  Hz), 161.3, 157.9, 139.9, 136.8, 134.2, 133.8, 130.3, 129.6, 129.5, 129.1, 118.6 (t,  $J_{C-F} = 253.4$  Hz), 110.8, 46.3 (t,  $J_{C-F} = 3.5$  Hz), 45.7 (t,  $J_{C-F} = 6.0$  Hz), 44.0, 43.4, 43.1, 38.4 (t,  $J_{C-F} = 22.3$  Hz); HRMS (ESI)  $m/z$  calcd for  $C_{25}H_{23}^{35}Cl_2F_2N_4O_2^+$   $[M + H]^+$   $m/z$  519.1161, found  $m/z$  519.1160.

**5,5,5-Trifluoro-1,2-diphenylpentan-1-one (3bn)**

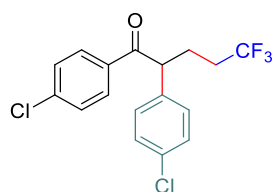

37% yield, 13.4 mg; white solid;  $^1H$  NMR (400 MHz,  $CDCl_3$ )  $\delta$  7.86 – 7.82 (m, 2H), 7.39 – 7.35 (m, 2H), 7.32 – 7.28 (m, 2H), 7.21 – 7.17 (m, 2H), 4.52 (t,  $J = 7.0$  Hz, 1H), 2.40 – 2.34 (m, 1H), 2.14 – 2.00 (m, 3H);  $^{19}F$  NMR (376 MHz,  $CDCl_3$ )  $\delta$  - 66.7 (m,  $J = 7.9$ , 3F);  $^{13}C$  NMR (100 MHz,  $CDCl_3$ )  $\delta$  197.1, 140.0, 136.6, 134.4, 133.9, 130.2, 129.8, 129.5, 129.2, 51.6, 31.5 (d,  $J_{C-F} = 28.9$  Hz), 26.1 (q,  $J_{C-F} = 3.4$  Hz); HRMS (ESI)  $m/z$  calcd for  $C_{17}H_{14}^{35}Cl_2F_3O_2^+$   $[M + H]^+$   $m/z$  361.0368, found  $m/z$  361.0376.

**1,2-Bis(4-chlorophenyl)-4-(methylsulfonyl)butan-1-one (3bo)**

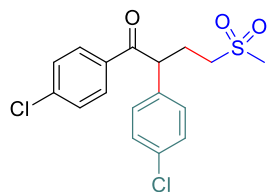

66% yield, 24.5 mg; yellow oil;  $^1H$  NMR (400 MHz,  $CDCl_3$ )  $\delta$  7.86 – 7.82 (m, 2H), 7.37 – 7.34 (m, 2H), 7.30 – 7.27 (m, 2H), 7.22 – 7.19 (m, 2H), 4.84 (t,  $J = 7.4$  Hz, 1H), 3.06 – 2.94 (m, 2H), 2.91 (s, 3H), 2.66 – 2.57 (m, 1H), 2.39 – 2.31 (m, 1H);  $^{13}C$  NMR (100 MHz,  $CDCl_3$ )  $\delta$  197.2, 140.1, 136.2, 134.2, 134.1, 130.3, 129.8, 129.6, 129.2, 52.1, 50.9, 41.0, 26.6; HRMS (ESI)  $m/z$  calcd for  $C_{17}H_{17}^{35}Cl_2O_3S^+$   $[M + H]^+$   $m/z$  371.0270, found  $m/z$  371.0260.

**Dimethyl 2-(2,3-bis(4-chlorophenyl)-3-oxopropyl)malonate (3bp)**

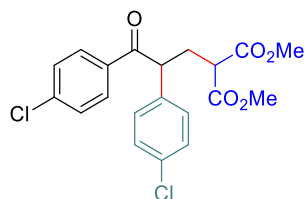

20% yield, 8.0 mg; yellow oil;  $^1\text{H NMR}$  (400 MHz,  $\text{CDCl}_3$ )  $\delta$  7.86 – 7.82 (m, 2H), 7.38 – 7.34 (m, 2H), 7.30 – 7.25 (m, 2H), 7.20 – 7.17 (m, 2H), 4.65 (t,  $J = 7.4$  Hz, 1H), 3.75 (s, 3H), 3.67 (s, 3H), 3.30 (dd,  $J_1 = 8.1$  Hz,  $J_2 = 6.7$  Hz, 1H), 2.73 – 2.66 (m, 1H), 2.42 – 2.34 (m, 1H);  $^{13}\text{C NMR}$  (100 MHz,  $\text{CDCl}_3$ )  $\delta$  197.2, 169.6(2), 169.5(5), 139.9, 136.4, 134.4, 133.9, 130.3, 129.8, 129.6, 129.1, 52.9, 52.8, 50.2, 49.2, 32.3; HRMS (ESI)  $m/z$  calcd for  $\text{C}_{20}\text{H}_{18}^{35}\text{Cl}_2\text{O}_5\text{Na}^+$   $[M + \text{Na}]^+$   $m/z$  431.0424, found  $m/z$  431.0409.

**Methyl (4,5-bis(4-chlorophenyl)-2,2-difluoro-5-oxopentanoyl)glycinate (3bq)**

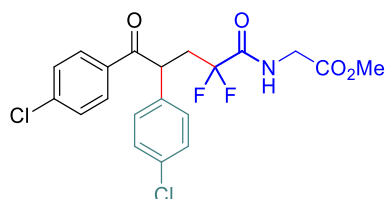

90% yield, 40.0 mg; yellow oil;  $^1\text{H NMR}$  (400 MHz,  $\text{CDCl}_3$ )  $\delta$  7.91 – 7.88 (m, 2H), 7.39 – 7.36 (m, 2H), 7.27 – 7.21 (m, 4H), 6.79 (s, 1H), 4.98 (dd,  $J_1 = 8.0$  Hz,  $J_2 = 5.2$  Hz, 1H), 4.08 – 3.97 (m, 2H), 3.80 (s, 3H), 3.31 – 3.17 (m, 1H), 2.63 – 2.50 (m, 1H);  $^{19}\text{F NMR}$  (376 MHz,  $\text{CDCl}_3$ )  $\delta$  -104.5 to -104.7 (m, 2F);  $^{13}\text{C NMR}$  (100 MHz,  $\text{CDCl}_3$ )  $\delta$  196.1, 169.3, 164.1 (t,  $J_{\text{C-F}} = 28.9$  Hz), 140.0, 136.3, 134.1, 133.9, 130.4, 129.7, 129.6, 129.2, 117.0 (t,  $J_{\text{C-F}} = 250.2$  Hz), 52.9, 46.1 (t,  $J_{\text{C-F}} = 3.9$  Hz), 41.1, 37.5 (t,  $J_{\text{C-F}} = 23.2$  Hz); HRMS (ESI)  $m/z$  calcd for  $\text{C}_{20}\text{H}_{18}^{35}\text{Cl}_2\text{F}_2\text{NO}_4^+$   $[M + \text{H}]^+$   $m/z$  444.0575, found  $m/z$  444.0566.

**Methyl (4,5-bis(4-chlorophenyl)-2,2-difluoro-5-oxopentanoyl)-L-phenylalaninate (3br)**

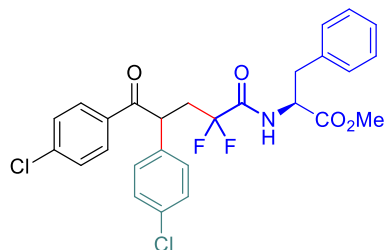

82% yield, 43.8 mg; yellow oil; dr = 1 : 1;  $^1\text{H NMR}$  (400 MHz,  $\text{CDCl}_3$ )  $\delta$  7.89 – 7.85 (m, 2H), 7.38 – 7.34 (m, 2H), 7.31 – 7.16 (m, 7H), 7.12 – 7.05 (m, 2H), 6.72 (d,  $J = 7.8$  Hz, 1H), 4.95 – 4.90 (m, 1H), 4.84 – 4.74 (m, 1H), 3.77 (d,  $J = 6.5$  Hz, 3H), 3.21 – 3.07 (m, 3H), 2.56 – 2.42 (m, 1H);  $^{19}\text{F NMR}$  (376 MHz,  $\text{CDCl}_3$ , two diastereoisomers)  $\delta$  one isomer -102.9 to -103.5 (m, 1F), -105.5 to -106.1 (m, 1F); another isomer -102.2 to -102.8 (m, 1F), -106.2 to -106.8 (m, 1F);  $^{13}\text{C NMR}$  (100 MHz,  $\text{CDCl}_3$ , two diastereoisomers)  $\delta$  one isomer 196.1, 170.9(overlapped), 163.5 (t,  $J_{\text{C-F}} = 29.3$  Hz), 140.0(overlapped), 136.4, 135.1, 134.1, 133.8, 130.3, 129.6, 129.5, 129.3, 129.1, 128.9, 127.6, 116.9 (t,  $J_{\text{C-F}} = 252.0$  Hz), 53.2, 52.8, 46.1, 37.9, 37.6, 37.4 (t,  $J_{\text{C-F}} = 23.4$  Hz); another isomer 196.1, 170.9(overlapped), 163.4 (t,  $J_{\text{C-F}} = 28.5$  Hz), 140.0(overlapped), 136.2, 135.0, 134.1, 133.8, 130.3, 129.6, 129.5, 129.3, 129.1, 128.9, 127.6, 116.8 (t,  $J_{\text{C-F}} = 252.6$  Hz), 53.1, 52.8, 46.0, 37.9, 37.6, 37.4 (t,  $J_{\text{C-F}} = 23.4$  Hz); HRMS (ESI)  $m/z$  calcd for  $\text{C}_{27}\text{H}_{24}^{35}\text{Cl}_2\text{F}_2\text{NO}_4^+$   $[M + \text{H}]^+$   $m/z$  534.1045, found  $m/z$  534.1045.

**4,5-Bis(4-chlorophenyl)-2,2-difluoro-N-(((1*S*,4*aS*,10*aS*)-7-isopropyl-1,4*a*,10*a*-trimethyl-1,2,3,4,4*a*,9,10,10*a*-octahydrophenanthren-1-yl)methyl)-5-oxopentanamide (3bs)**

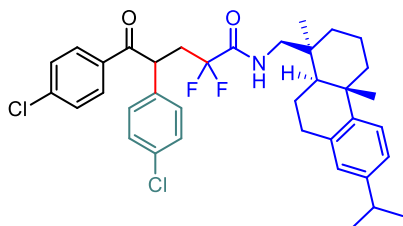

56% yield, 35.8 mg; yellow oil, dr = 1 : 1;  $^1\text{H}$  NMR (400 MHz,  $\text{CDCl}_3$ )  $\delta$  7.88 – 7.82 (m, 2H), 7.39 – 7.34 (m, 2H), 7.26 – 7.22 (m, 2H), 7.20 – 7.16 (m, 3H), 7.03 – 6.99 (m, 1H), 6.89 – 6.87 (m, 1H), 6.25 (s, 1H), 5.00 – 4.93 (m, 1H), 3.31 – 3.13 (m, 3H), 2.95 – 2.75 (m, 3H), 2.56 – 2.43 (m, 1H), 2.32 – 2.28 (m, 1H), 1.87 – 1.63 (m, 5H), 1.46 – 1.32 (m, 3H), 1.23 – 1.20 (m, 9H), 0.95 (s, 3H);  $^{19}\text{F}$  NMR (376 MHz,  $\text{CDCl}_3$ , two diastereoisomers)  $\delta$  one isomer –103.5 to –103.6 (m, 2F); another isomer –103.6(5) to –103.7(4) (m, 2F);  $^{13}\text{C}$  NMR (100 MHz,  $\text{CDCl}_3$ )  $\delta$  one isomer 196.3, 164.1 (overlapped, t,  $J_{\text{C-F}}=28.23$  Hz), 146.9(overlapped), 145.9(overlapped), 140.0(overlapped), 136.4(overlapped), 134.6(overlapped), 134.2(overlapped), 133.9(overlapped), 130.3, 129.6, 129.2(overlapped), 127.1, 124.4(overlapped), 124.1(overlapped), 117.2 (t,  $J_{\text{C-F}}=251.8$  Hz), 50.1, 46.3, 46.1, 38.3(overlapped), 37.7, 37.5, 36.3, 33.6(overlapped), 30.4, 25.5, 24.1(overlapped), 19.2(overlapped), 18.6; another isomer 196.3, 164.1 (overlapped, t,  $J_{\text{C-F}}=28.23$  Hz), 146.9(overlapped), 145.9(overlapped), 140.0(overlapped), 136.4(overlapped), 134.6(overlapped), 134.2(overlapped), 133.9(overlapped), 130.3, 129.6, 129.2(overlapped), 127.0, 124.4(overlapped), 124.1(overlapped), 117.1 (t,  $J_{\text{C-F}}=251.8$  Hz), 50.1, 46.2, 46.0, 38.3(overlapped), 37.6, 37.5, 36.2, 33.6(overlapped), 30.3, 25.5, 24.1(overlapped), 19.2(overlapped), 18.6; HRMS (ESI)  $m/z$  calcd for  $\text{C}_{37}\text{H}_{42}^{35}\text{Cl}_2\text{F}_2\text{NO}_2^+ [\text{M} + \text{H}]^+$   $m/z$  640.2555, found  $m/z$  640.2556.

**(1R,2S,5R)-2-Isopropyl-5-methylcyclohexyl**  
**oxopentanoate (3bt)**

**4,5-bis(4-chlorophenyl)-2,2-difluoro-5-**

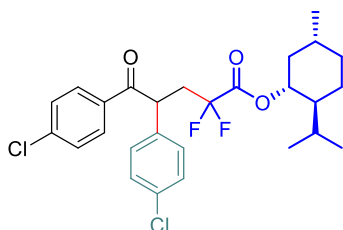

95% yield, 48.5 mg; yellow oil, dr = 1 : 1;  $^1\text{H}$  NMR (400 MHz,  $\text{CDCl}_3$ , two diastereoisomers)  $\delta$  one isomer 7.88 – 7.84 (overlapped, 2H), 7.40 – 7.36 (overlapped, 2H), 7.28 – 7.25 (overlapped, 2H), 7.23 – 7.19 (overlapped, 2H), 4.92 – 4.87 (overlapped, 1H), 4.80 – 4.70 (overlapped, 1H), 3.34 – 3.17 (overlapped, 1H), 2.53 – 2.38 (overlapped, 1H), 1.98 – 1.79 (overlapped, 2H), 1.72 – 1.65 (overlapped, 2H), 1.51 – 1.39 (overlapped, 2H), 0.93 – 0.86 (overlapped, 9H), 0.75 – 0.73 (overlapped, 3H);  $^{19}\text{F}$  NMR (376 MHz,  $\text{CDCl}_3$ , two diastereoisomers)  $\delta$  one isomer –104.0 (overlapped,  $J = 16.8$  Hz, 1F), –104.1 to –104.2 (m, 1F); another isomer –104.0 (overlapped,  $J = 16.8$  Hz, 1F), –104.3 to –104.4 (m, 1F);  $^{13}\text{C}$  NMR (100 MHz,  $\text{CDCl}_3$ , two diastereoisomers)  $\delta$  one isomer 195.9, 163.3 (t,  $J_{\text{C-F}} = 32.2$  Hz), 139.9(overlapped), 136.2, 133.9(2), 133.8(5)(overlapped), 130.2, 129.5(2), 129.4(8), 129.0(overlapped), 115.2 (t,  $J_{\text{C-F}} = 250.3$  Hz), 46.7(overlapped), 46.0 (t,  $J_{\text{C-F}}=7.5$  Hz), 40.1, 37.8 (t,  $J_{\text{C-F}}=23.3$  Hz), 33.9, 31.4, 26.1, 23.3, 21.9, 20.6 (overlapped), 16.1 (overlapped); another isomer 195.8, 163.3 (t,  $J_{\text{C-F}} = 31.3$  Hz), 139.9(overlapped), 136.1, 133.8(5)(overlapped), 133.8(2), 130.1, 129.51, 129.41, 129.0(overlapped), 115.2 (t,  $J_{\text{C-F}} = 249.9$  Hz), 46.7(overlapped), 46.0 (t,  $J_{\text{C-F}}=7.5$  Hz), 40.2, 37.8 (t,  $J_{\text{C-F}}=22.9$  Hz), 33.9, 31.3, 26.1, 23.2, 21.9, 20.6 (overlapped), 16.1 (overlapped); HRMS (ESI)  $m/z$  calcd

for  $C_{27}H_{31}^{35}Cl_2F_2O_3^+ [M + H]^+$   $m/z$  511.1613, found  $m/z$  511.1659.

## 5. TEMPO inhibition experiment

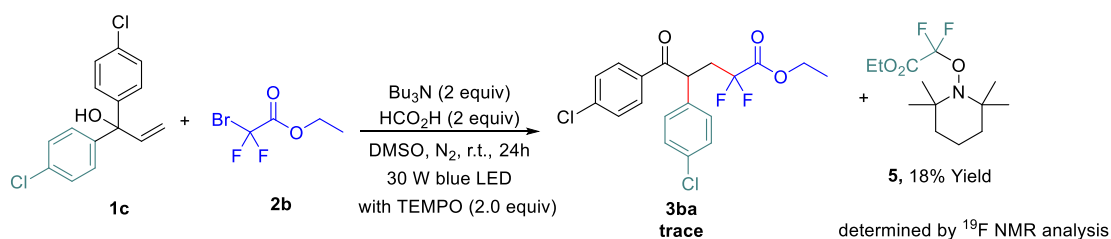

A 5 mL Schlenk tube containing a PTFE-coated stirring bar was charged with TEMPO (0.2 mmol, 31.2 mg) and 1,1-bis(4-chlorophenyl) prop-2-en-1-ol **1c** (0.1 mmol, 27.9 mg). The vessel was then evacuated and filled with nitrogen three times. Then, DMSO (2 mL) was added, followed by the addition of ethyl difluorobromoacetate **2a** (0.2 mmol, 25.4  $\mu\text{L}$ ), tributylamine (0.2 mmol, 47.5  $\mu\text{L}$ ) and formic acid (0.2 mmol, 6.6  $\mu\text{L}$ ) under nitrogen flow. Finally, the tube was sealed and placed in the photoreactor about 2 cm away from a 30 W blue LEDs light irradiation with a water chiller to maintain the temperature at 25 °C. After 24 hours, the reaction was then quenched satd.  $\text{NH}_4\text{Cl}$  solution (15 mL) and extracted with ethyl acetate ( $3 \times 10$  mL). The organic layer was concentrated. The yield of product formed was determined by  $^{19}\text{F}$  NMR with trifluorotoluene as internal standard. The  $^{19}\text{F}$  NMR signal of compound **5** was consistent with the reported data.<sup>4</sup>

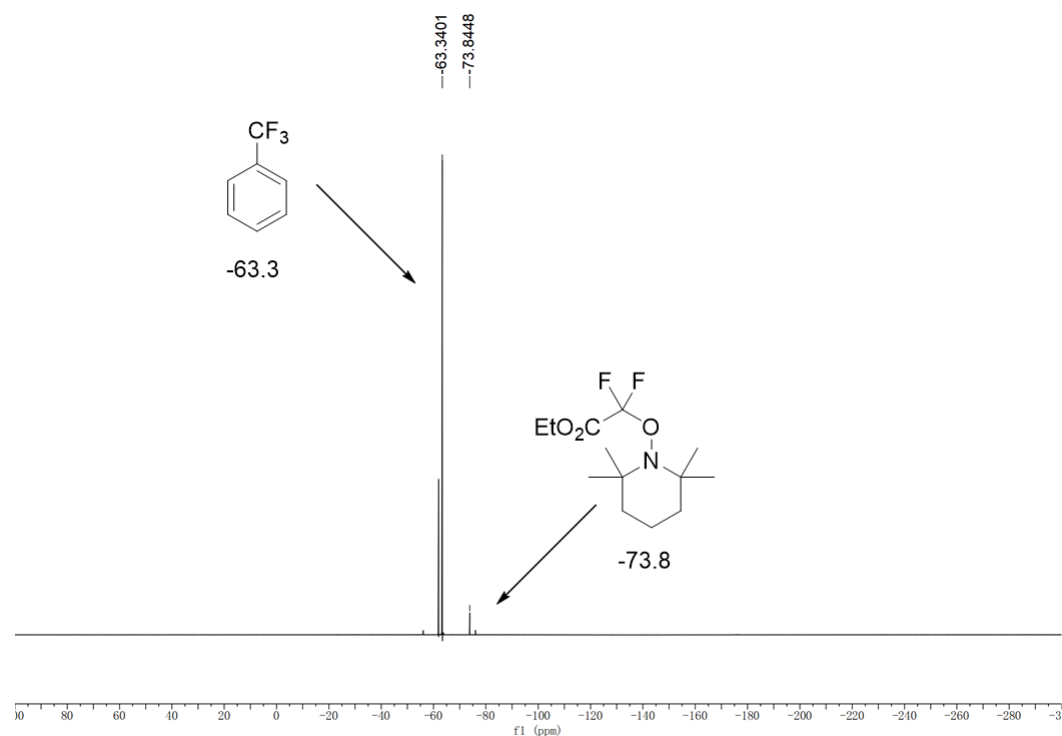

## 6. Sunlight irradiation experiment



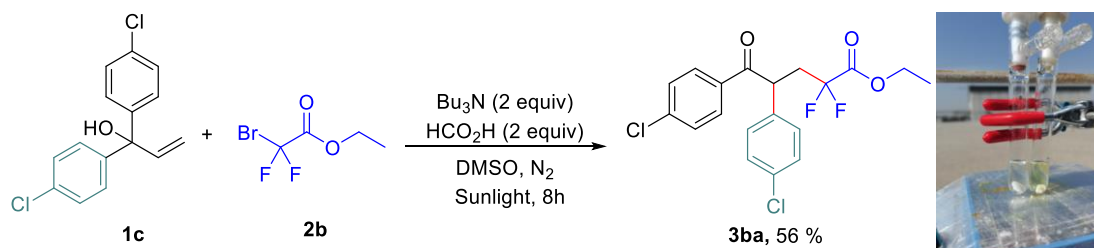

A 5 mL Schlenk tube containing a PTFE-coated stirring bar was charged with 1,1-bis(4-chlorophenyl) prop-2-en-1-ol **1c** (0.1 mol, 27.9mg). The vessel was then evacuated and filled with nitrogen three times. Next, DMSO (2 mL) was added, followed by the addition of ethyl difluorobromoacetate **2a** (0.2 mmol, 25.4  $\mu\text{L}$ ), tributylamine (0.2 mmol, 47.5  $\mu\text{L}$ ) and formic acid (0.2 mmol, 6.6  $\mu\text{L}$ ) under nitrogen flow. The tube was then sealed and irradiated with sunlight for 8 hours. The reaction was quenched with satd.  $\text{NH}_4\text{Cl}$  solution (15 mL) and extracted with ethyl acetate (3 x 10 mL). The organic layer was concentrated to give the crude product, which was purified by column chromatography on silica gel with petroleum ether/ethyl acetate mixtures to give the product in 54% yield.

## 7. Scaleup experiment

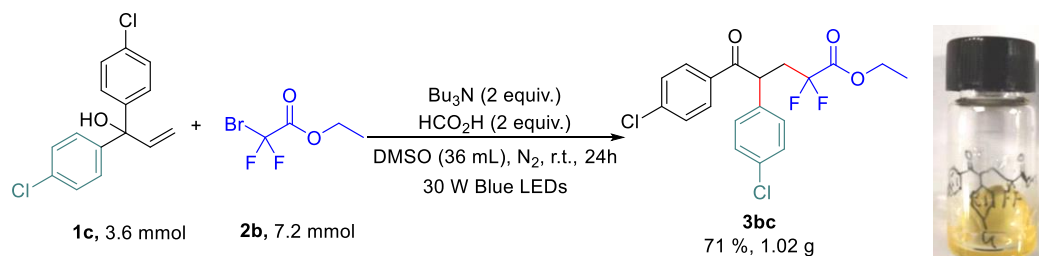

A 5 mL Schlenk tube containing a PTFE-coated stirring bar was charged with 1,1-bis(4-chlorophenyl) prop-2-en-1-ol **1c** (3.6 mol, 1.04g, 1 equiv.). The vessel was then evacuated and filled with nitrogen three times. Then, DMSO (2 mL) was added, followed by the addition of ethyl difluorobromoacetate **2a** (7.2 mmol, 0.92 mL, 2 equiv.), tributylamine (7.2 mmol, 1.7mL, 2 equiv.) and formic acid (7.2 mmol, 0.24mL, 2 equiv.) under nitrogen flow. Finally, the tube was sealed and placed in the photoreactor about 2 cm away from a 30 W blue LEDs light irradiation with a water chiller to maintain the temperature at 25 °C. After 24 hours, the reaction was then quenched with satd.  $\text{NH}_4\text{Cl}$  solution (100 mL) and extracted with ethyl acetate (3  $\times$  50 mL). The organic layer was concentrated, the crude product was purified by column chromatography on silica gel with petroleum ether/ethyl acetate as the eluent to give compound **3ba** (1.02 g, 71% yield).

## 8. Quantum yield measurement

Quantum yield experiments were performed according to the procedure of Yoon.<sup>5, 6</sup>

### 8.1 Determination of the photo flux of the light source:

The photon flux of the spectrophotometer was determined by standard ferrioxalate actinometry. A 0.15 M solution of ferrioxalate was prepared by dissolving 2.21 g of potassium ferrioxalate hydrate in 30 mL of 0.05 M H<sub>2</sub>SO<sub>4</sub>. A buffered solution of phenanthroline was prepared by dissolving 50 mg of phenanthroline and 11.25 g of sodium acetate in 50 mL of 0.5 M H<sub>2</sub>SO<sub>4</sub>. Both solutions were covered in foil and stored in dark. To determine the photon flux of our lamp source, 2.0 mL of the ferrioxalate solution was placed in a 5 mL screw-top test tube and irradiated for 10.0s with the photoreactor 2 cm away from a 30 W blue LEDs light irradiation. After irradiation, 0.35 mL of the phenanthroline solution was added to the test tube. The solution was then allowed to rest for 1 h in dark to make sure the ferrous ions completely coordinating to phenanthroline. The absorbance of the solution was then measured at 510 nm. Conversion was calculated using eq. 1

$$\text{mol Fe}^{2+} = \frac{V \cdot \Delta A}{l \cdot \epsilon} \quad (1)$$

Where  $V$  is the total volume (0.00235 L) of the solution after addition of phenanthroline,  $\Delta A$  is the difference in the absorbance at 510 nm between the irradiated and non-irradiated solutions,  $l$  is the path length (1.000 cm), and  $\epsilon$  is the molar absorptivity at 510 nm (11,100 L mol<sup>-1</sup> cm<sup>-1</sup>). The photon flux can be calculated using eq. 2

$$\text{Photon flux} = \frac{\text{mol Fe}^{2+}}{\Phi \cdot t \cdot f} \quad (2)$$

Where  $\Phi$  is the quantum yield for the ferrioxalate actinometer (1.01 for a 0.15 M solution at  $\lambda = 460$  nm),<sup>6</sup>  $t$  is the irradiation time (10.0 s), and  $f$  is the fraction of light absorbed at  $\lambda = 460$  nm. The fraction of light absorbed ( $f$ ) by this solution was calculated using eq. 3, where  $A$  is the measured absorbance at 460 nm.

$$f = 1 - 10^{-A} \quad (3)$$

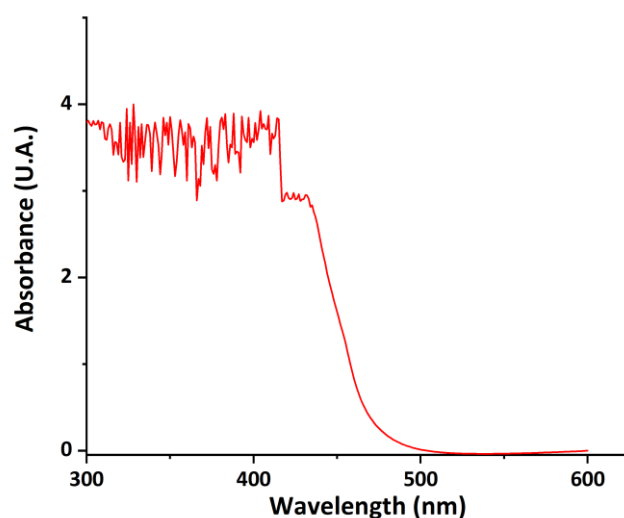

The absorbance of the above ferrioxalate solution at 460 nm was measured to be 0.840, which means  $f = 0.840$ , *vide infra*. Then, the photo flux of the light source could be calculated:

**Sample calculation:**

$$\text{Mol Fe}^{2+} = \frac{0.00235 \text{ L} \cdot 1.233}{1 \text{ cm} \cdot 11100 \text{ L mol}^{-1} \text{ cm}^{-1}} = 2.61 \times 10^{-7} \text{ mol}$$

$$\text{Photon flux} = \frac{2.61 \times 10^{-7} \text{ mol}}{0.845 \cdot 10 \text{ s} \cdot 0.85546} = 3.61 \times 10^{-8} \text{ einsteins s}^{-1}$$

The photon flux was calculated (average of three experiments) to be  $3.61 \times 10^{-8}$  einsteins  $\text{s}^{-1}$ .

## 8.2 Determination of quantum yield

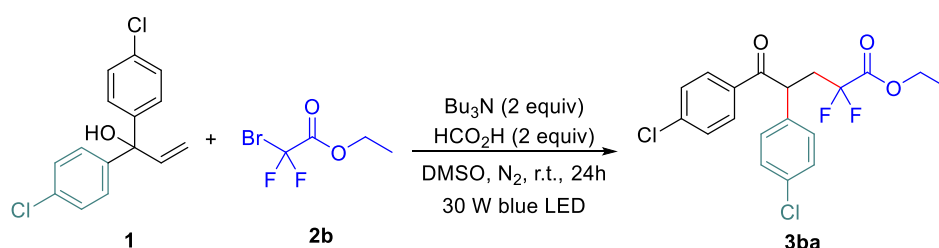

A 5 mL Schlenk tube containing a PTFE-coated stirring bar was charged with 1,1-bis(4-chlorophenyl) prop-2-en-1-ol **1c** (0.1 mol, 27.9mg). The vessel was then evacuated and filled with nitrogen three times. Then, DMSO (2 mL) was added, followed by the addition of ethyl difluorobromoacetate **2a** (0.2 mmol, 25.4  $\mu\text{L}$ ), tributylamine (0.2 mmol, 47.5  $\mu\text{L}$ ) and formic acid (0.2 mmol, 6.6  $\mu\text{L}$ ) under nitrogen flow. Finally, the tube was sealed and placed in the photoreactor about 2 cm away from a 30 W blue LEDs light irradiation with a water chiller to maintain the temperature at 25

°C. After 20 min, the reaction was then quenched with satd. NH<sub>4</sub>Cl solution (15 mL) and extracted with ethyl acetate (3 × 10 mL). The organic layer was concentrated. The yield of product formed was determined by <sup>1</sup>H NMR with a 1,3,5-Trimethoxybenzene as internal standard. Average yield of three experiments was 24% yield. The fraction of light absorbed (*f*) by this solution was calculated to be 0.89 using eq. 3. The quantum yield was calculated using eq. 4 the average yield of three experiments to be 0.62.

$$\phi = \frac{\text{moles of product formed}}{\text{einsteins of light absorbed}} \quad (4)$$

**Sample quantum yield calculation:**

$$\phi = \frac{2.4 \times 10^{-5} \text{ mol}}{3.61 \times 10^{-8} \text{ einsteins s}^{-1} \cdot 1200 \text{ s} \cdot 1.00 \cdot 0.89183} = 0.62$$

## 9. Light on/off Experiment

A 5 mL Schlenk tube containing a PTFE-coated stirring bar was charged with 1,1-bis(4-chlorophenyl) prop-2-en-1-ol **1c** (0.1 mol, 27.9 mg). The vessel was then evacuated and filled with nitrogen three times. Then, DMSO (2 mL) was added, followed by the addition of ethyl difluorobromoacetate **2a** (0.2 mmol, 25.4 μL), tributylamine (0.2 mmol, 47.5 μL) and formic acid (0.2 mmol, 6.6 μL) under nitrogen flow. Finally, the tube was sealed and placed in the photoreactor about 2 cm away from a 30 W blue LEDs light irradiation and kept in the dark in 1 hour intervals with a water chiller to maintain the temperature at 25 °C. The reaction was then quenched satd. NH<sub>4</sub>Cl solution (15 mL) and extracted with ethyl acetate (3 × 10 mL). The organic layer was concentrated. The yield of **3ba** was determined by <sup>1</sup>H NMR with 1,3,5-trimethoxybenzene as internal standard.

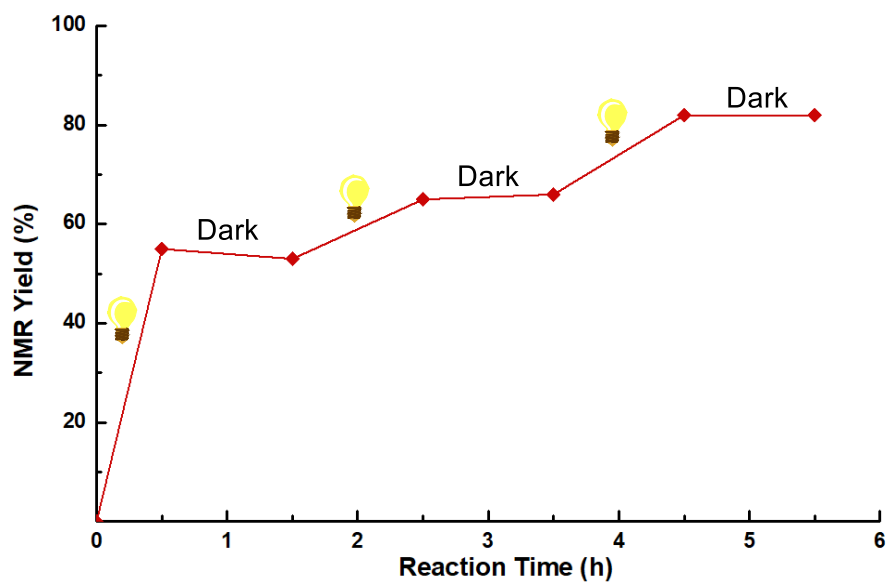

Figure S1. Reaction profile of light on/off experiment

## 10. UV-vis absorption spectra

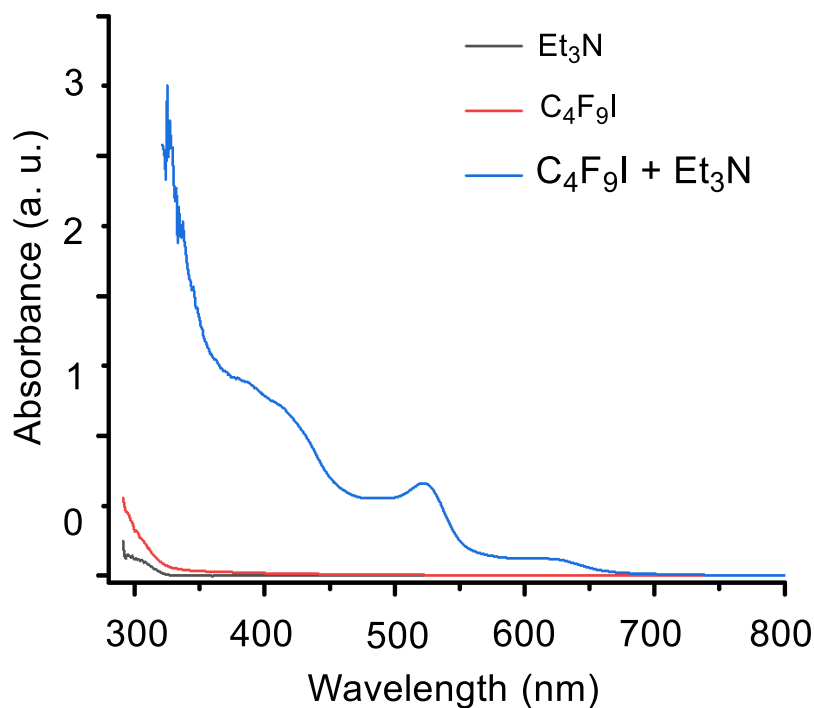

**Figure S2.** UV–visible absorption spectra of  $\text{Et}_3\text{N}$ ,  $\text{C}_4\text{F}_9\text{I}$  and mixture solution of  $\text{Et}_3\text{N}/\text{C}_4\text{F}_9\text{I}$  in  $\text{DMSO} / \text{CH}_3\text{OH}$  (99:1, v/v) ( $c = 0.01 \text{ M}$ ).

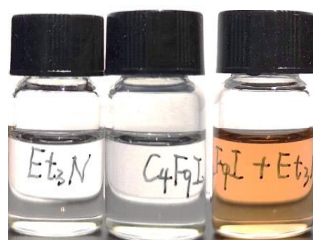

**Figure S3.** Photograph of solution of  $\text{Et}_3\text{N}$ ,  $\text{C}_4\text{F}_9\text{I}$  and mixture solution of  $\text{Et}_3\text{N}/\text{C}_4\text{F}_9\text{I}$  in  $\text{DMSO} / \text{CH}_3\text{OH}$  (99:1, v/v) ( $c = 0.01 \text{ M}$ ).

**Conclusion:** *UV-Vis spectrum of the mixture of  $\text{Et}_3\text{N}/\text{C}_4\text{F}_9\text{I}$  shows a strong bathochromic shift and a charge transfer band, which support the formation of halogen bonded complex in the reaction mixture between  $\text{Et}_3\text{N}$  and  $\text{C}_4\text{F}_9\text{I}$ .*

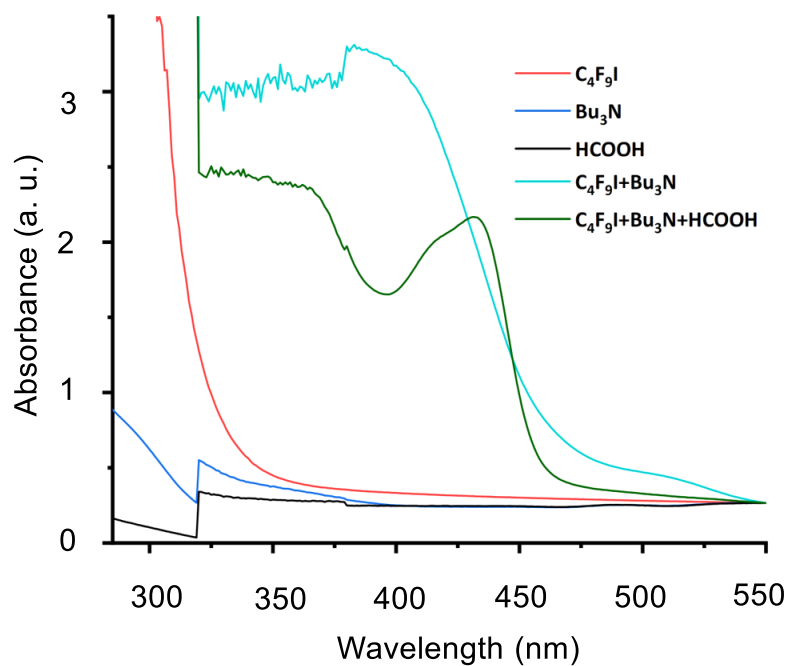

**Figure S4.** UV–visible absorption spectra of  $\text{Bu}_3\text{N}$ ,  $\text{C}_4\text{F}_9\text{I}$ ,  $\text{HCOOH}$ , mixture solution of  $\text{Bu}_3\text{N}/\text{C}_4\text{F}_9\text{I}$  and mixture solution of  $\text{Bu}_3\text{N}/\text{C}_4\text{F}_9\text{I}/\text{HCOOH}$  in DMSO ( $c = 0.01 \text{ M}$ )

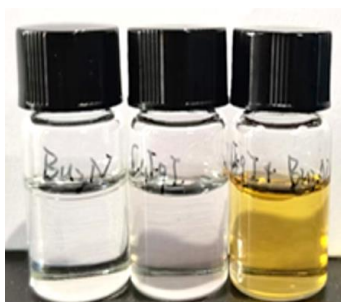

**Figure S5.** Photograph of solution of  $\text{Bu}_3\text{N}$ ,  $\text{C}_4\text{F}_9\text{I}$  and mixture solution of  $\text{Bu}_3\text{N}/\text{C}_4\text{F}_9\text{I}$  in DMSO ( $c = 0.01 \text{ M}$ ).

**Conclusion:** *UV-Vis spectrum of the mixture of  $\text{Bu}_3\text{N}/\text{C}_4\text{F}_9\text{I}/\text{HCOOH}$  shows a strong bathochromic shift and a charge transfer band, which support the formation of halogen bonded complex in the reaction mixture.*

## 11. $^{19}\text{F}$ NMR Titration of $\text{C}_4\text{F}_9\text{I}$ (2a) with $\text{Et}_3\text{N}$ .

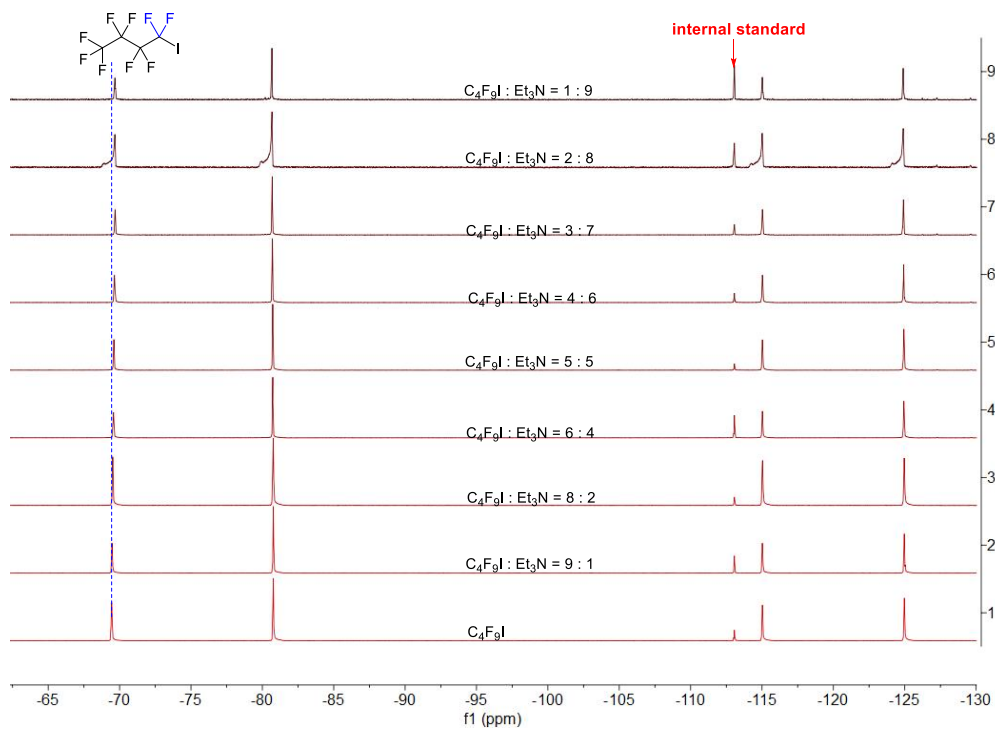

**Figure S6.**  $^{19}\text{F}$  NMR shift of  $\text{C}_4\text{F}_9\text{I}$  with the addition of  $\text{Et}_3\text{N}$  in  $\text{DMSO}/\text{CH}_3\text{OH}$  (90:10, v/v)

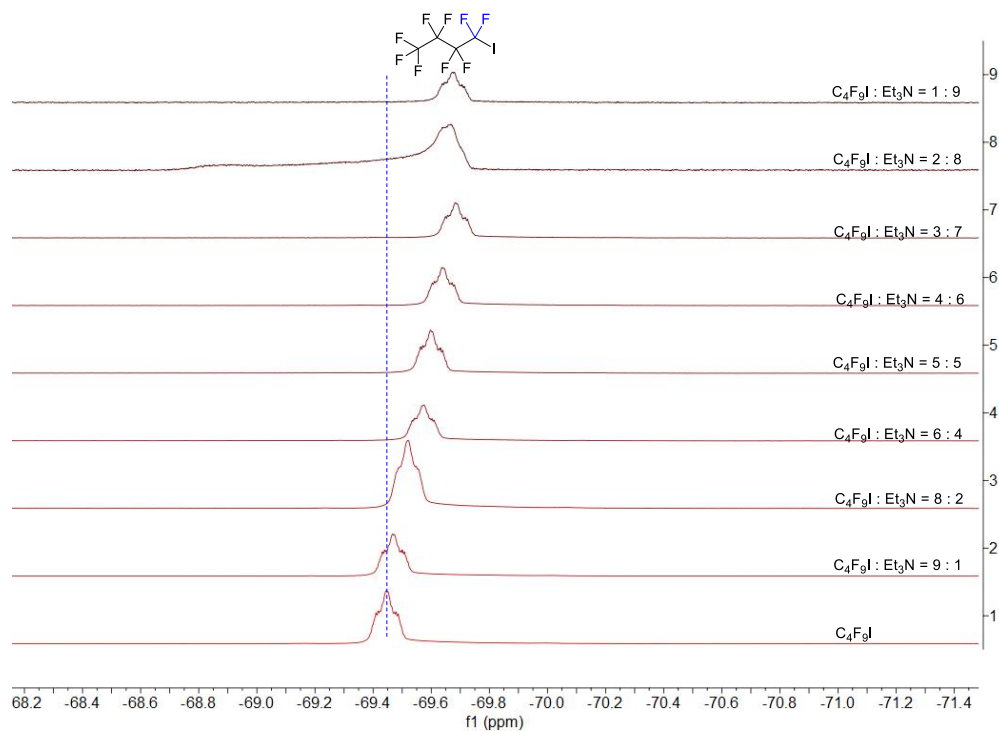

**Figure S7.**  $^{19}\text{F}$  NMR shift of  $\text{C}_4\text{F}_9\text{I}$  with the addition of  $\text{Et}_3\text{N}$  in  $\text{DMSO}/\text{CH}_3\text{OH}$  (90:10, v/v)

**Conclusion:** A clear upfield-shift of the  $^{19}\text{F}$  NMR signal was observed with the addition of  $\text{Et}_3\text{N}$  into  $\text{C}_4\text{F}_9\text{I}$ , which indicated the interaction, namely, halogen bond between  $\text{Et}_3\text{N}$  and  $\text{C}_4\text{F}_9\text{I}$ .



## 12. Determination of binding stoichiometry of halogen bond between C<sub>4</sub>F<sub>9</sub>I (2a) and Et<sub>3</sub>N.

Determination of binding stoichiometry experiments were performed by Job's method according to the reported procedure.<sup>7,8</sup> The binding stoichiometry between C<sub>4</sub>F<sub>9</sub>I (2a) and Et<sub>3</sub>N was evaluated using a Job's plot in 1.0 mL of DMSO/CH<sub>3</sub>OH (90:10, v/v) solution. In an NMR tube, total constant concentration [2a + Et<sub>3</sub>N] = 0.1 M. Samples were prepared for molar fractions  $\chi$  (2a) = 0.00, 0.10, 0.20, 0.30, 0.40, 0.50, 0.60, 0.80, 0.90, 1.00. <sup>19</sup>F NMR for each sample was recorded to measure the change in chemical shift for the F of C<sub>4</sub>F<sub>9</sub>I. Fluorobenzene was used as internal standard and  $\delta_{F-Ph} = -113.066$  ppm. The data show formation of a 1:1 adduct (maximum in the plot at  $\chi$  (2a) = 0.5).

|                      |        |         |         |         |         |
|----------------------|--------|---------|---------|---------|---------|
| $\chi$ (2a)          | 0      | 0.10    | 0.20    | 0.30    | 0.40    |
| $\Delta\delta$       | 0      | 0.2325  | 0.2308  | 0.2344  | 0.1891  |
| [2a]* $\Delta\delta$ | 0      | 0.02325 | 0.04616 | 0.07032 | 0.07564 |
| $\chi$ (2a)          | 0.50   | 0.60    | 0.80    | 0.90    | 1.00    |
| $\Delta\delta$       | 0.1536 | 0.1258  | 0.0723  | 0.0231  | 0       |
| [2a]* $\Delta\delta$ | 0.0768 | 0.07548 | 0.05784 | 0.02079 | 0       |

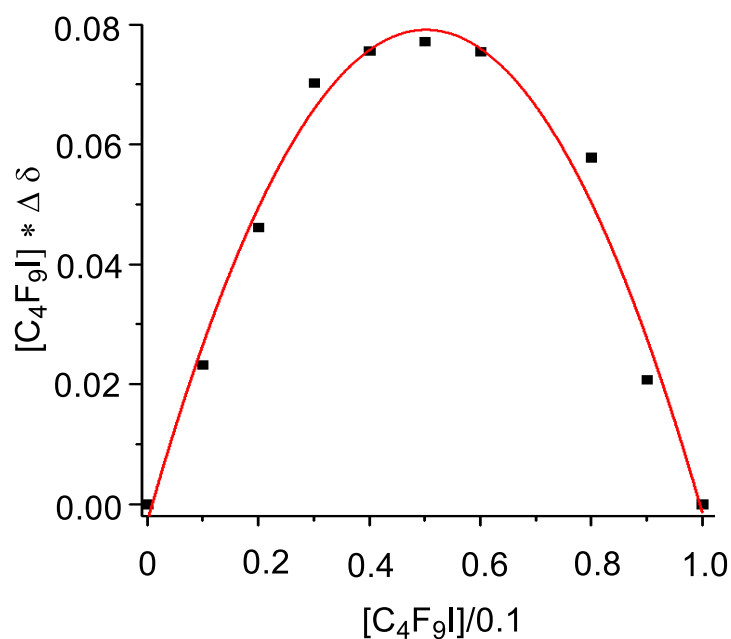

Figure S8. Job's plot

**Conclusion:** A clear upfield-shift of the <sup>19</sup>F NMR signal of C<sub>4</sub>F<sub>9</sub>I was observed with the addition of Et<sub>3</sub>N, which indicated the formation of halogen bonded complex between C<sub>4</sub>F<sub>9</sub>I and Et<sub>3</sub>N. This is in consistent with the redshift of the UV-Vis spectrum. And the halogen bond donor:acceptor ratio in the solution was calculated to be 1:1 via Job's method.

### 13. Reference

- 1 X. Liu, F. Xiong, X. Huang, L. Xu, P. Li and X. Wu, Copper-catalyzed trifluoromethylation-initiated radical 1,2-aryl migration in  $\alpha,\alpha$ -diaryl allylic alcohols, *Angew. Chem. Int. Ed.*, 2013, **52**, 6962–6966.
- 2 Y. Zhang, Z. Ren, Y-L. Liu, Z. Wang and Z. Li, Fluoroalkylation of allylic alcohols with concomitant(hetero)aryl migration: access to fluoroalkylated ketones and evaluation of antifungal action against magnaporthe grisea, *Eur. J. Org. Chem.*, 2020, **32**, 5192–5200.
- 3 P. Xu, K. Hu, Z. Gu, Y. Cheng and C. Zhu, Visible light promoted carbodifluoroalkylation of allylic alcohols via concomitant 1,2-aryl migration, *Chem. Commun.*, 2015, **51**, 7222–7225.
4. X. Wang, W. Wan, Y. Chen, J. Li, H. Jiang, Y. Wang, H. Deng and J. Hao, Ag<sup>I</sup>-promoted cascade for difluoromethylation of activated alkenes to difluoromethylated oxindoles, *Eur. J. Org. Chem.*, 2016, **22**, 3773–3779.
5. M. Cismesia and T. Yoon, Characterizing chain processes in visible light photoredox catalysis, *Chem. Sci.* 2015, **6**, 5426–5434.
6. L. Zheng, H. Yang, Photocatalytic hydroacylation of alkenes by directly using acyl oximes, *J. Org. Chem.* 2020, **85**, 11989–11996.
7. H. Zhang and S. Yu, Visible-light-induced radical acylation of imines with  $\alpha$ -ketoacids enabled by electron-donor-acceptor complexes, *Org. Lett.* 2019, **21**, 3711–3715.
8. X. Sun, W. Wang, Y. Li, J. Ma and S. Yu, Halogen-bond-promoted double radical isocyanide insertion under visible-light irradiation: synthesis of 2-fluoroalkylated quinoxalines, *Org. Lett.* 2016, **18**, 4638–4641.

## 14. NMR Spectra

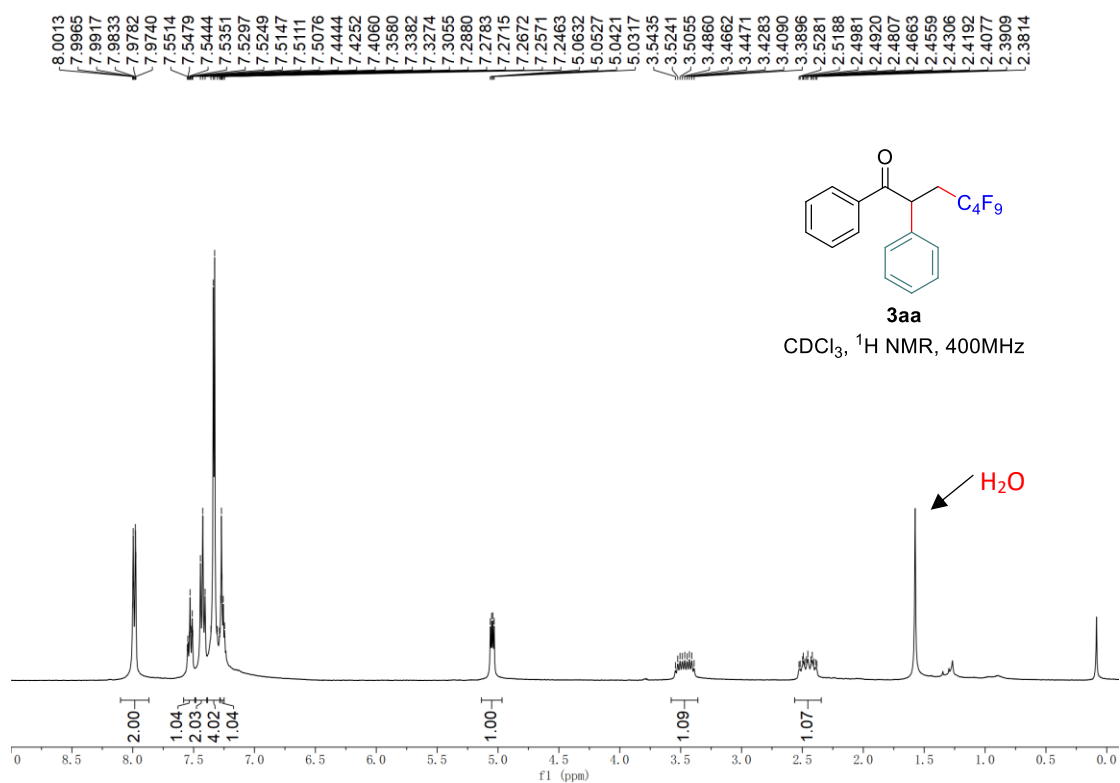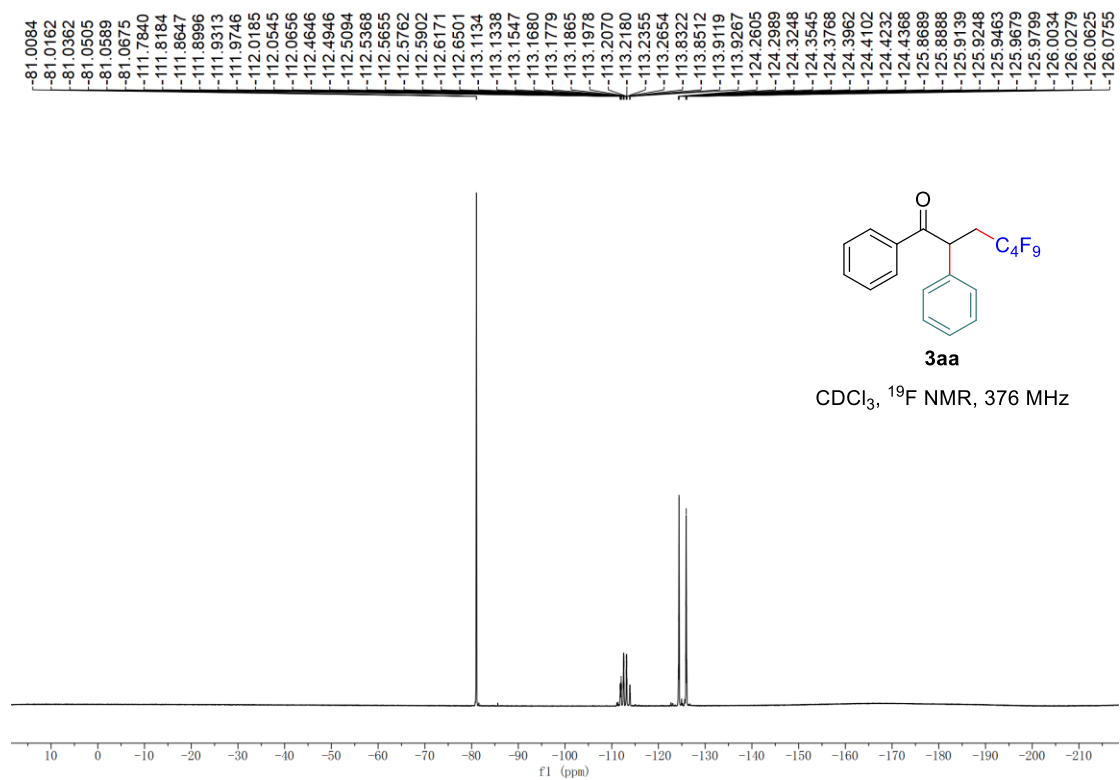

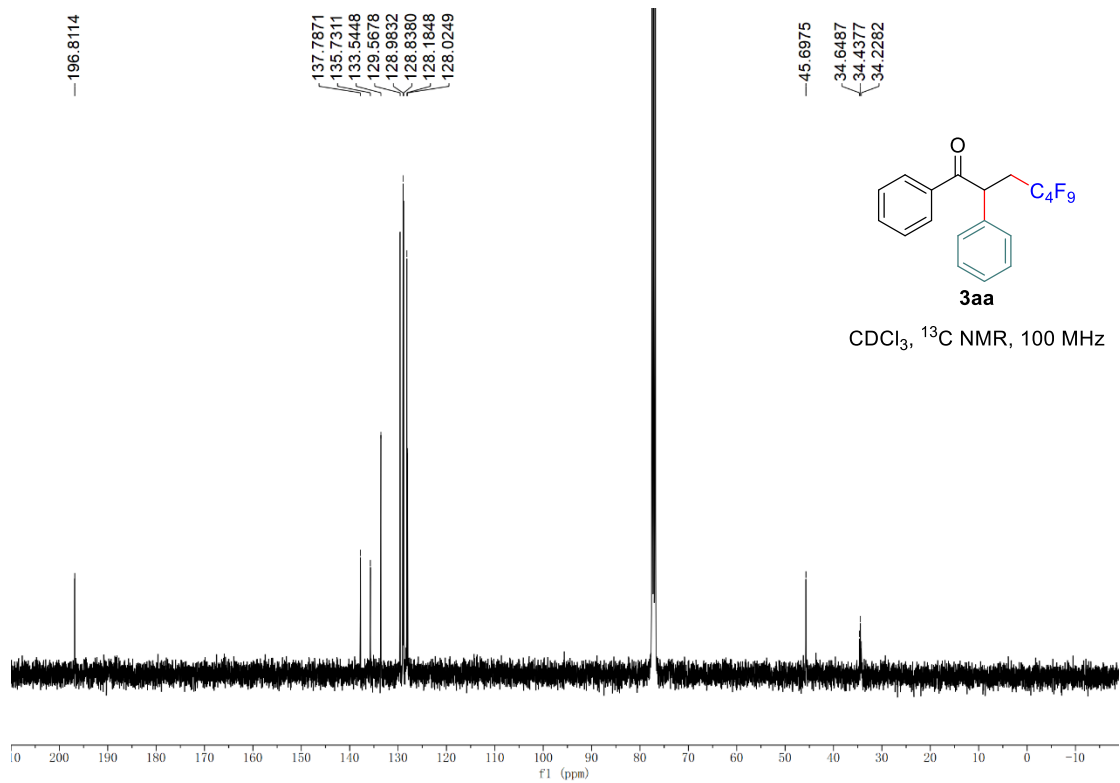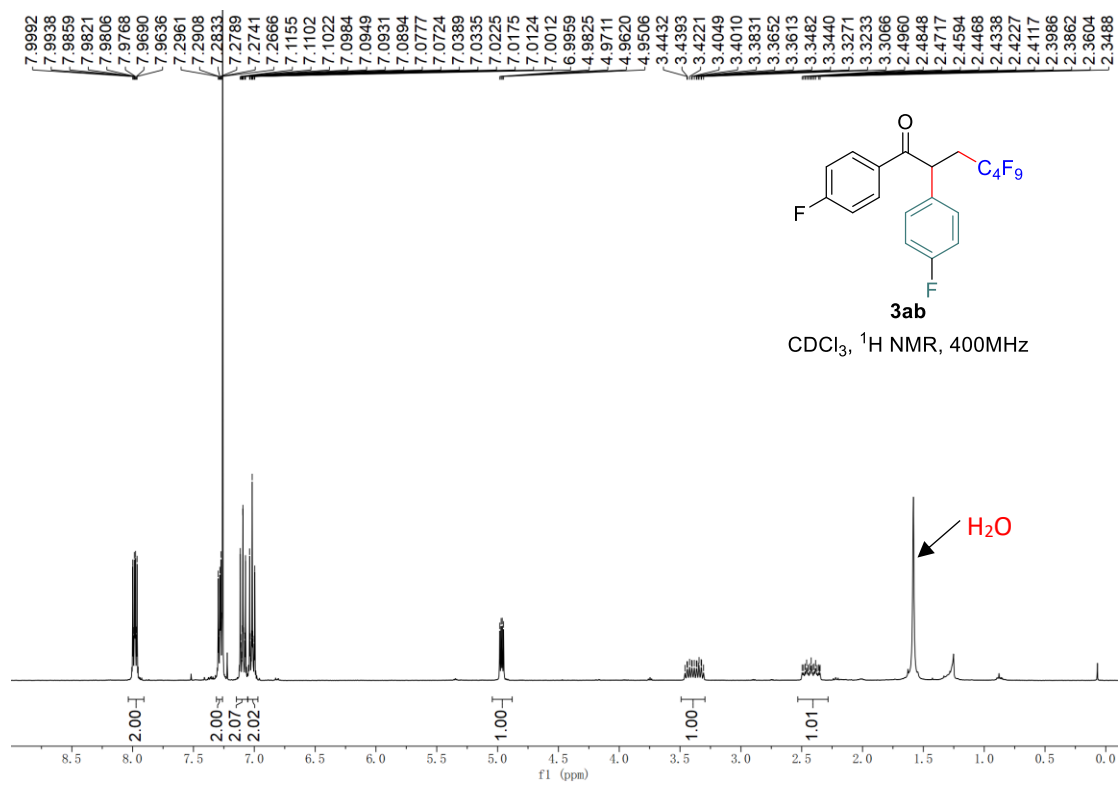

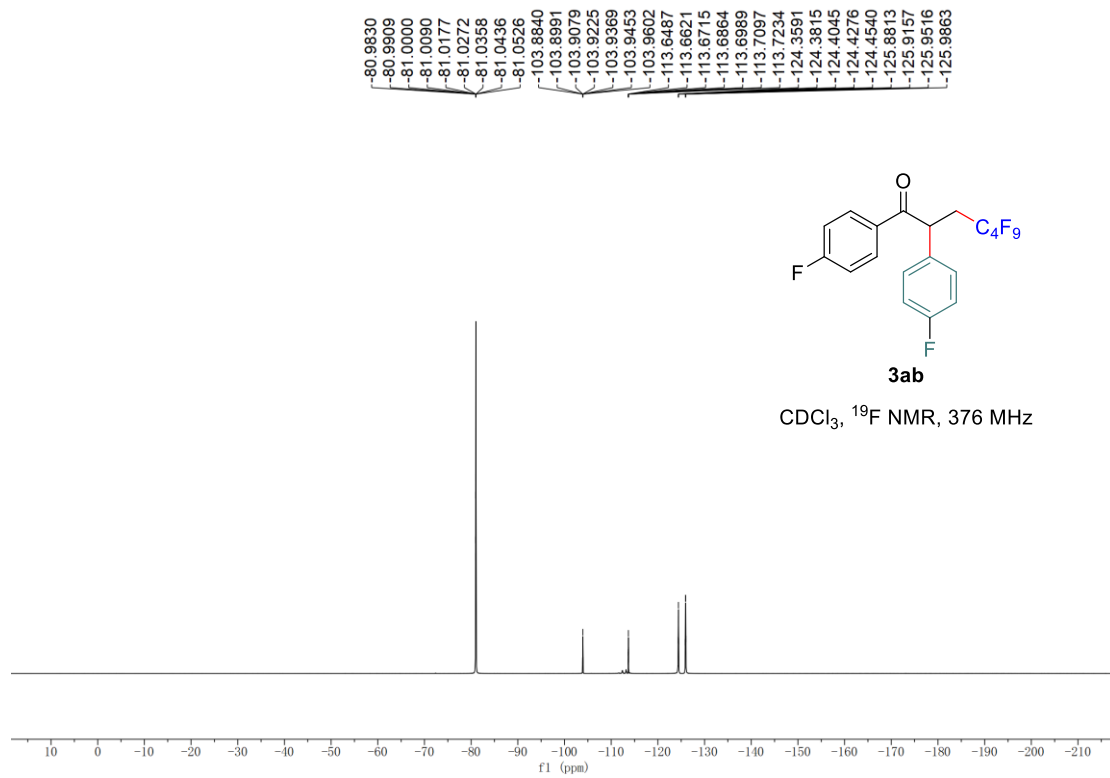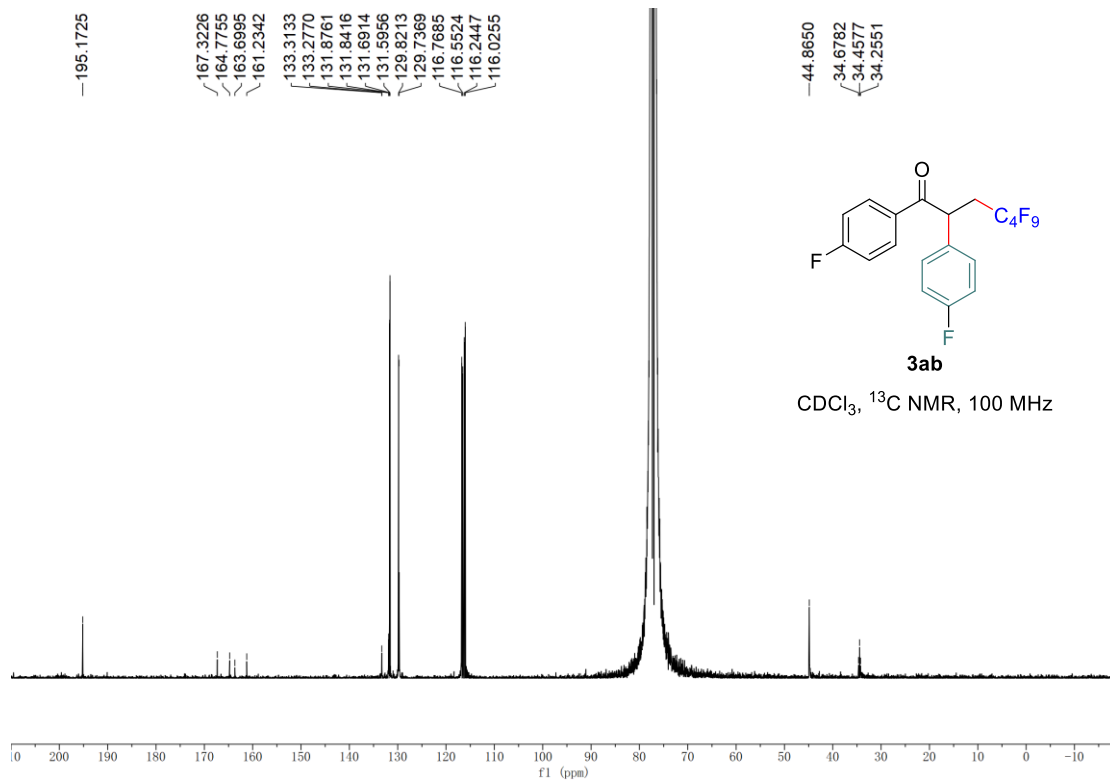

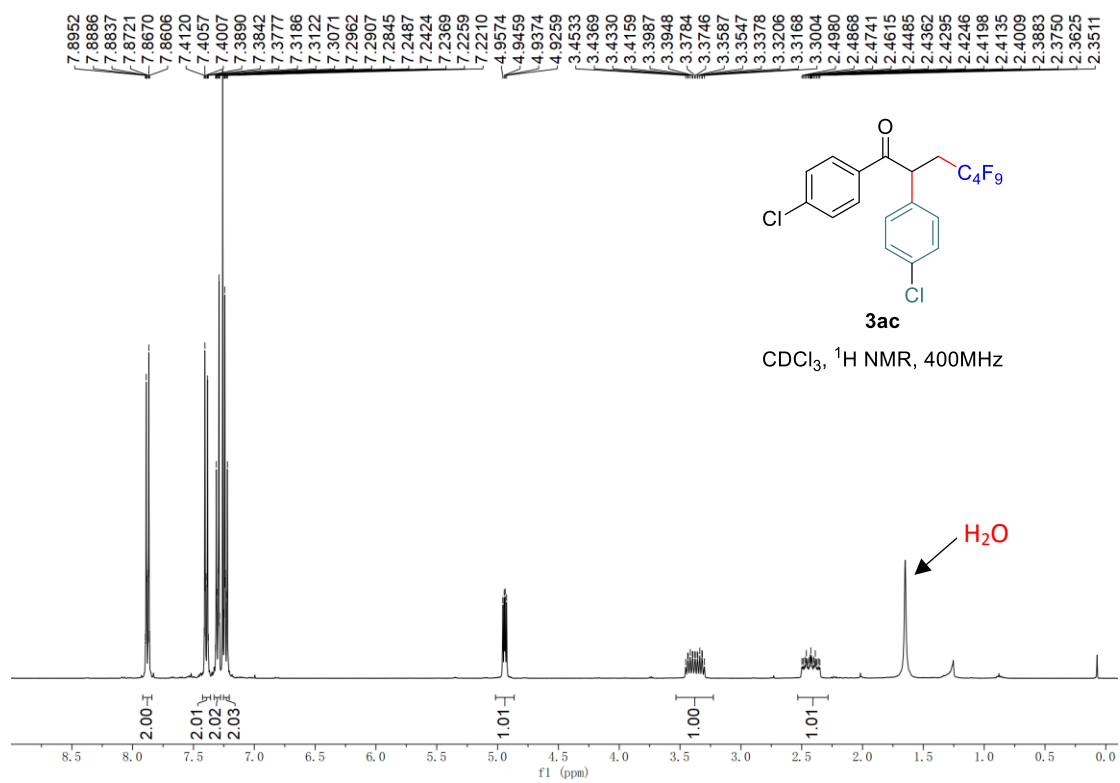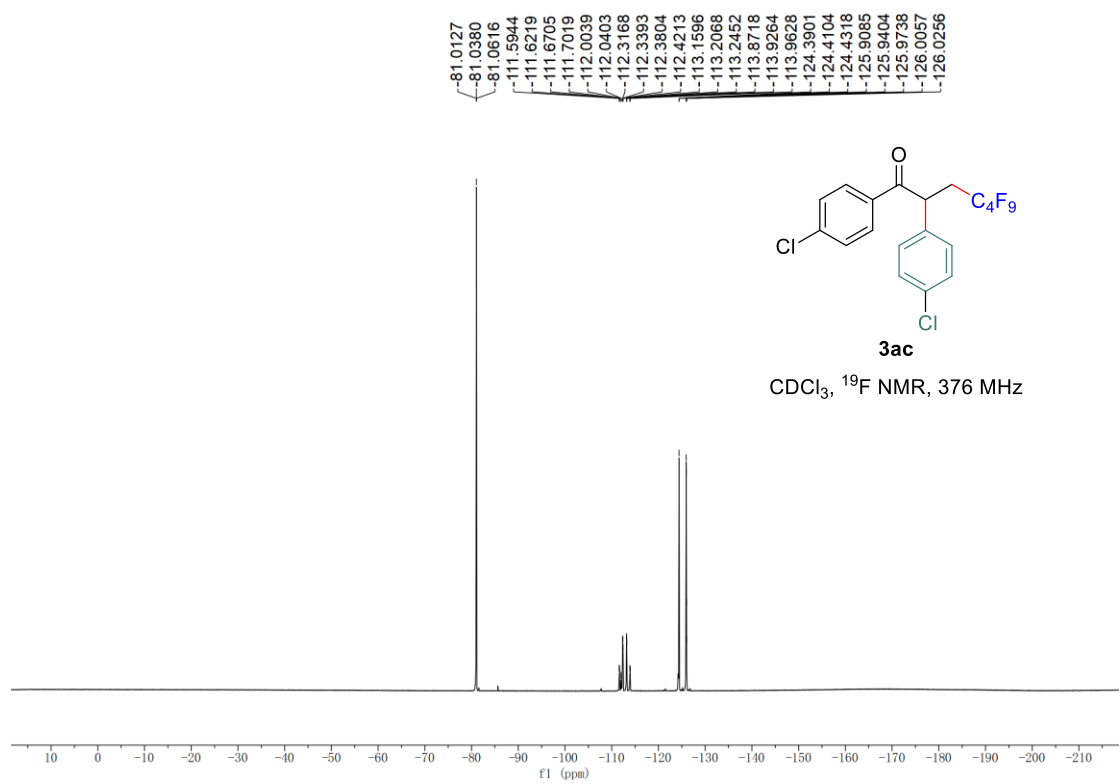

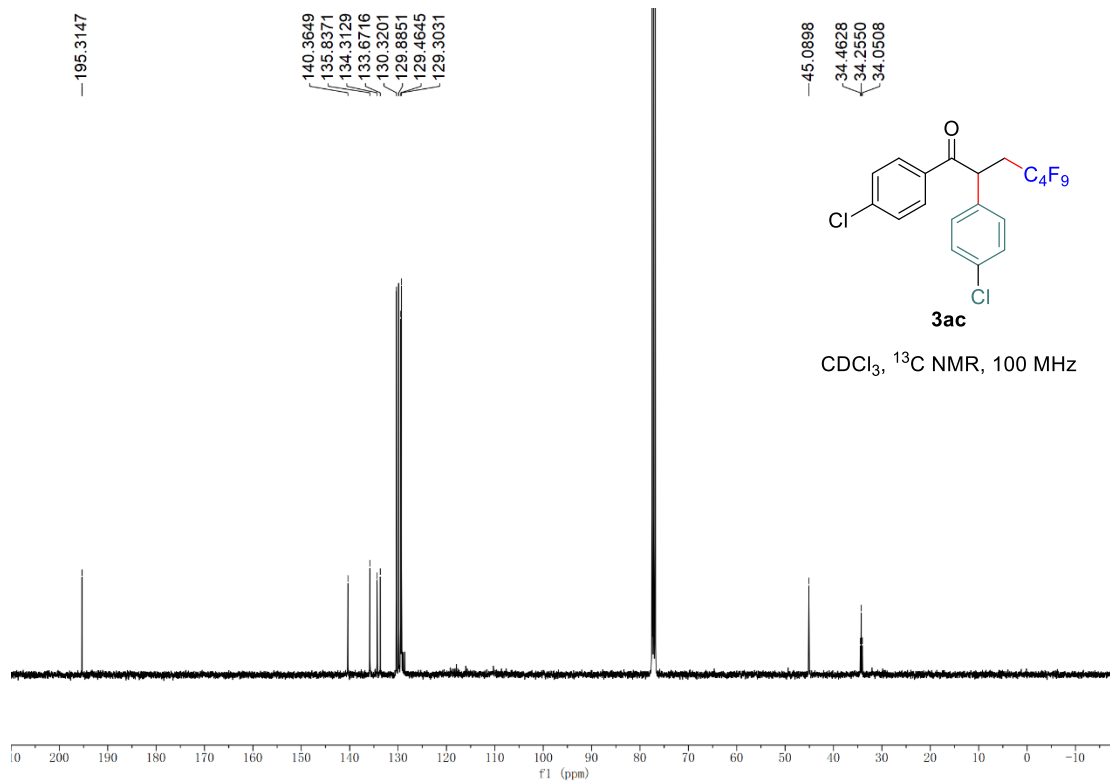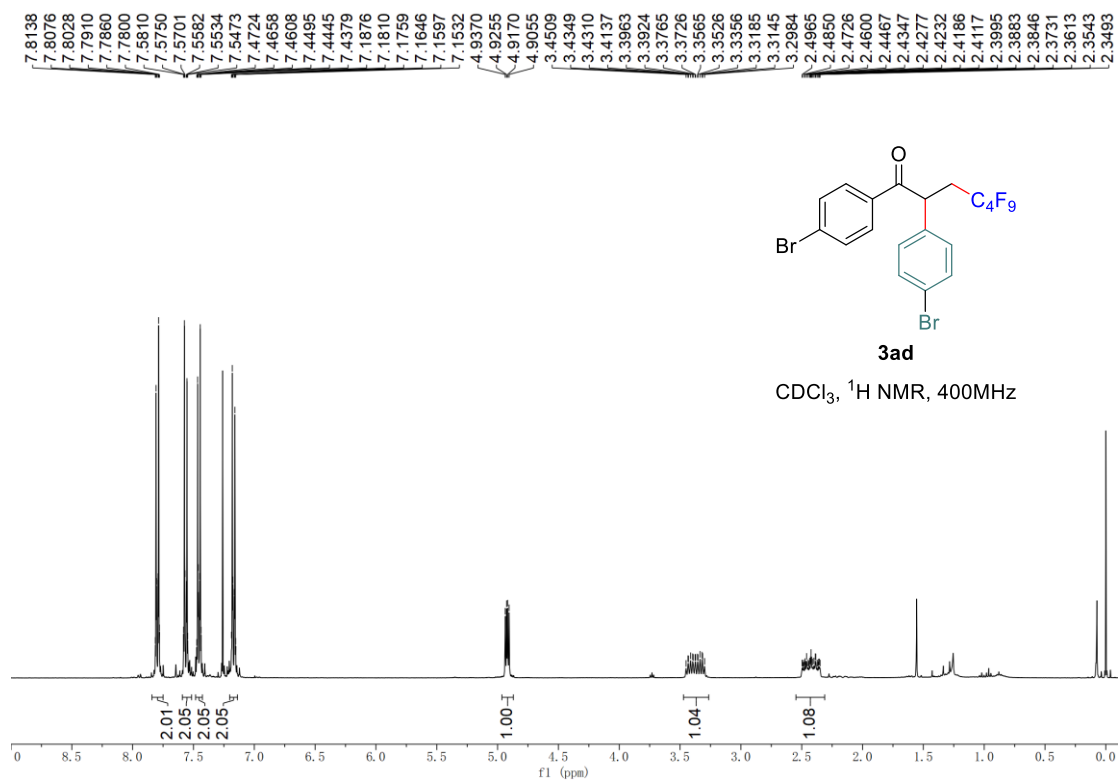

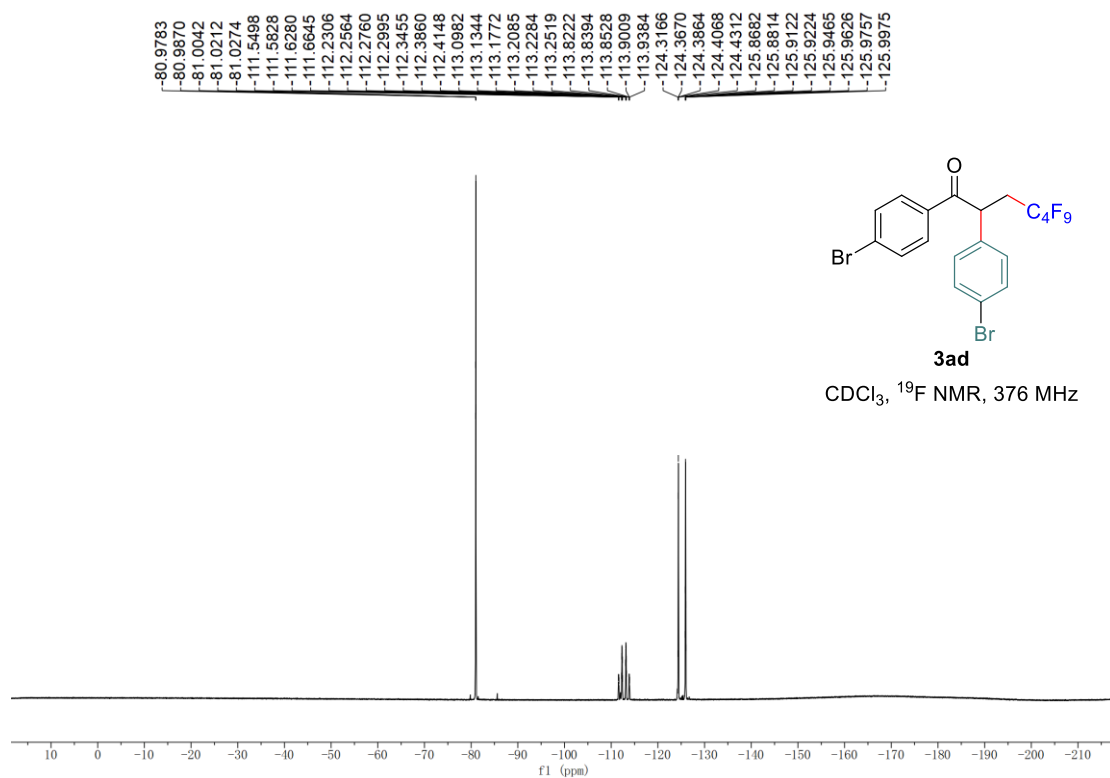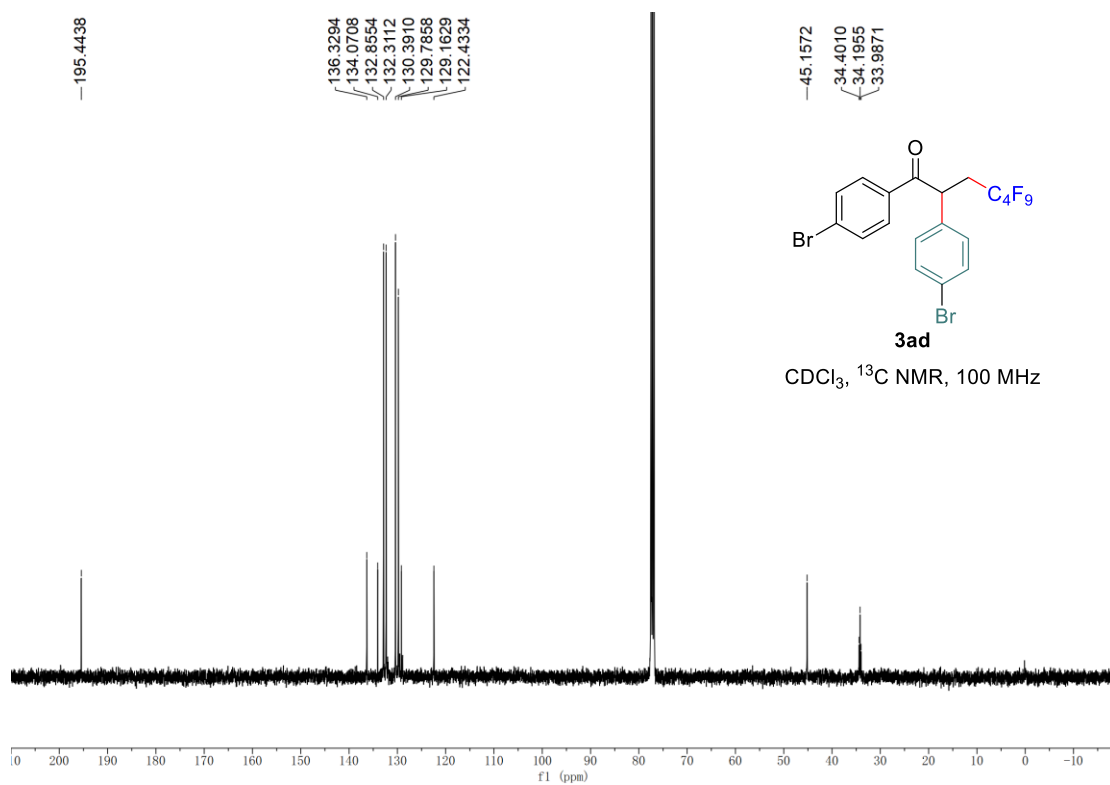



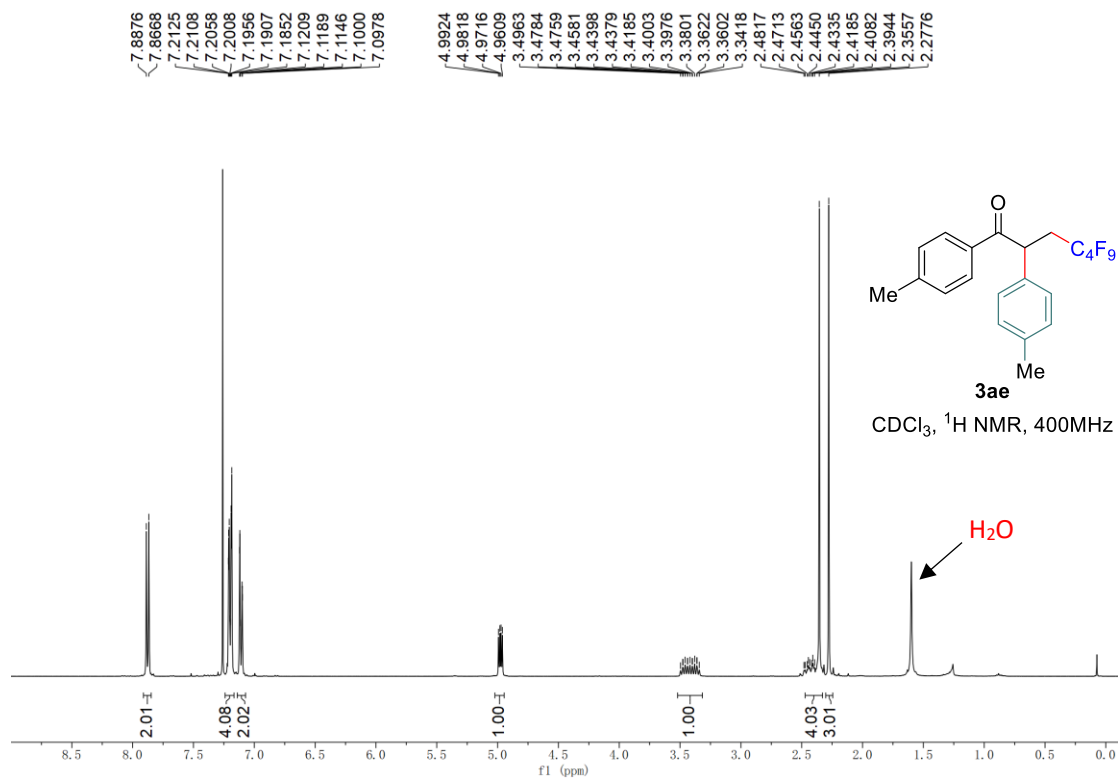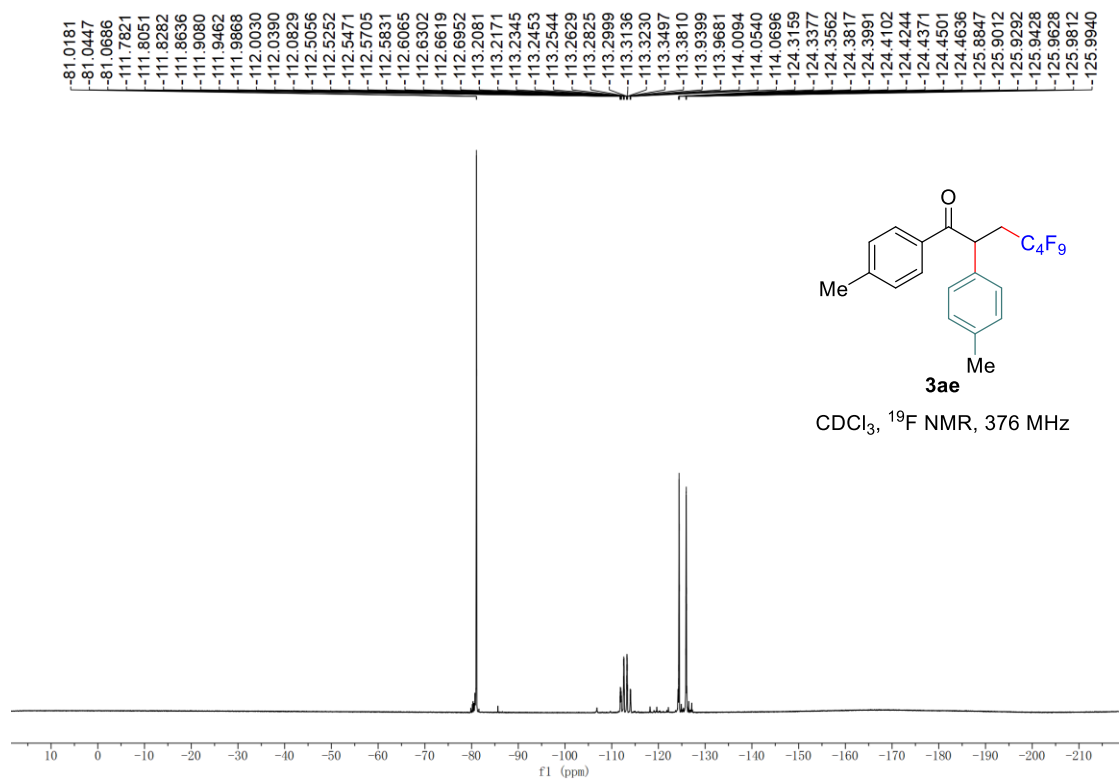

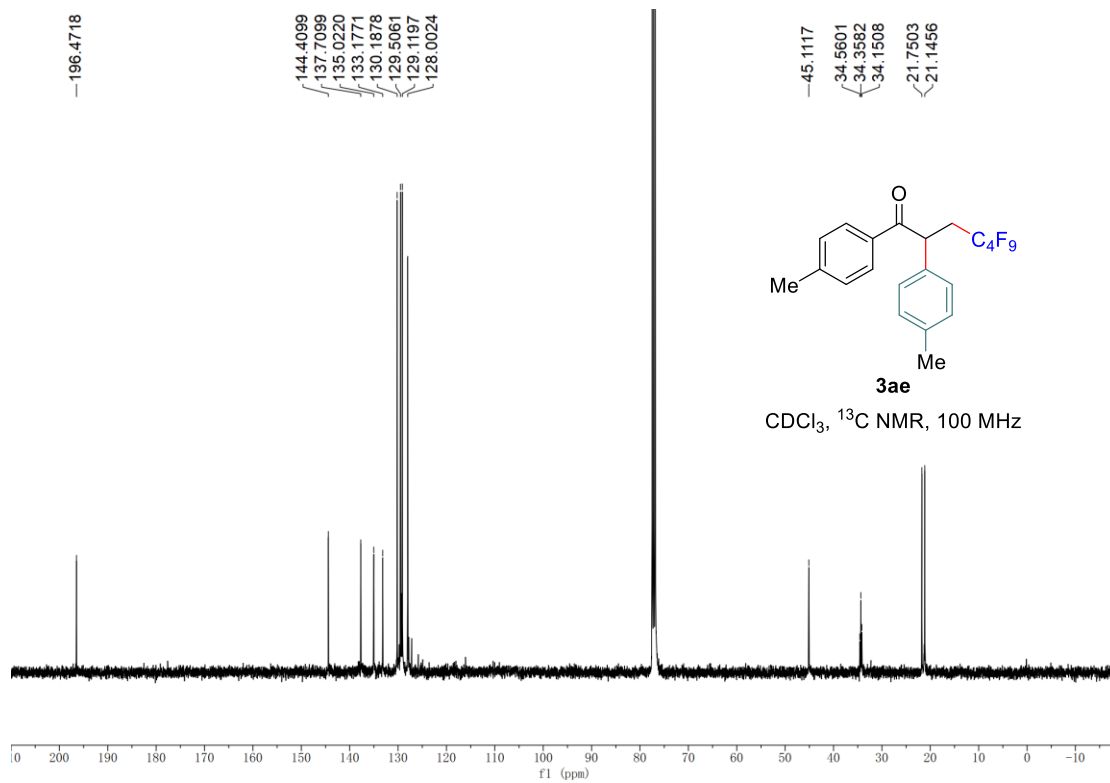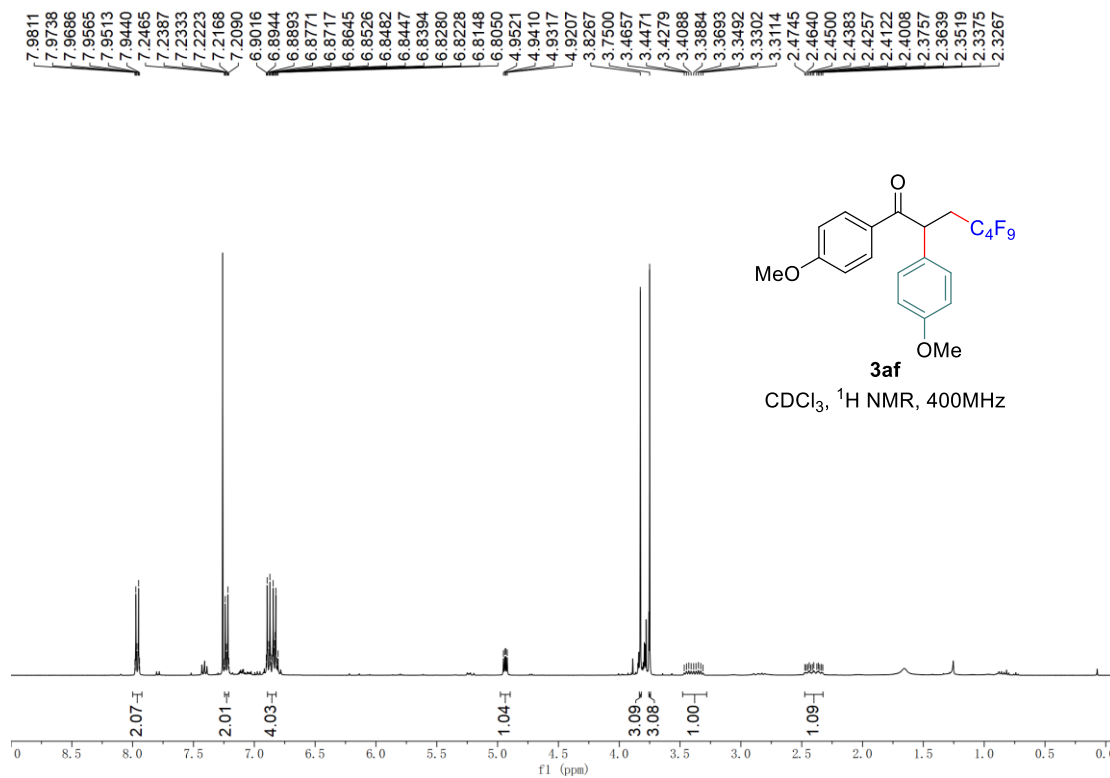

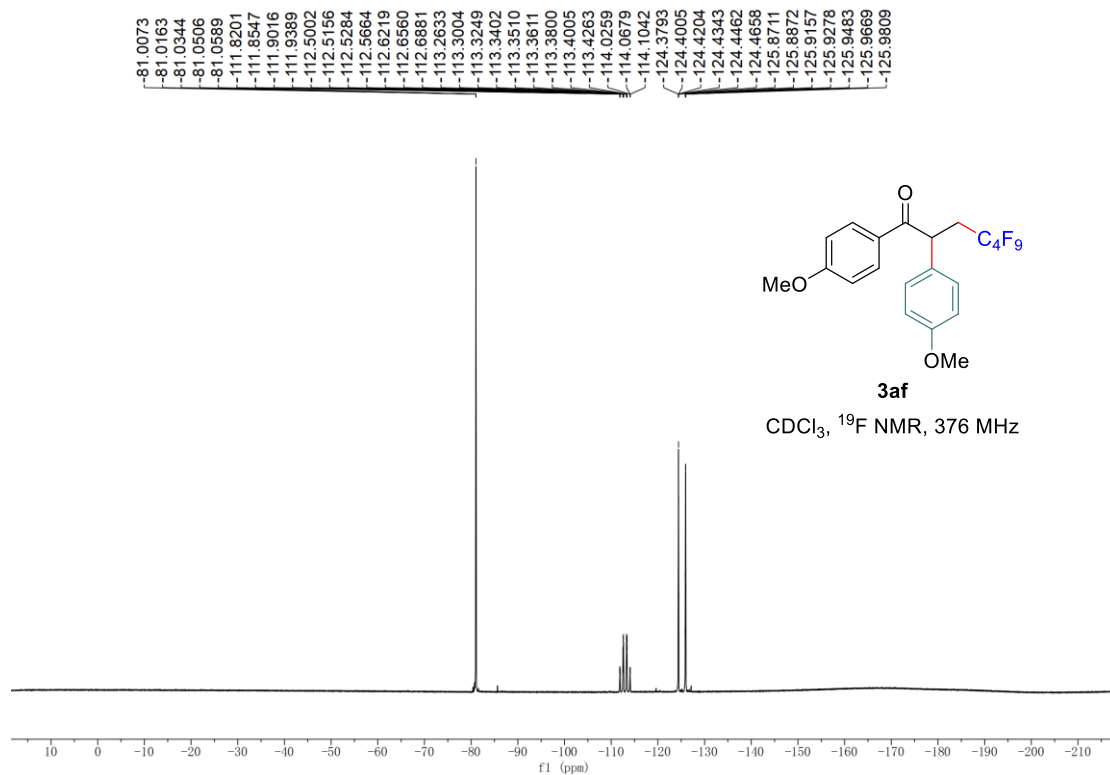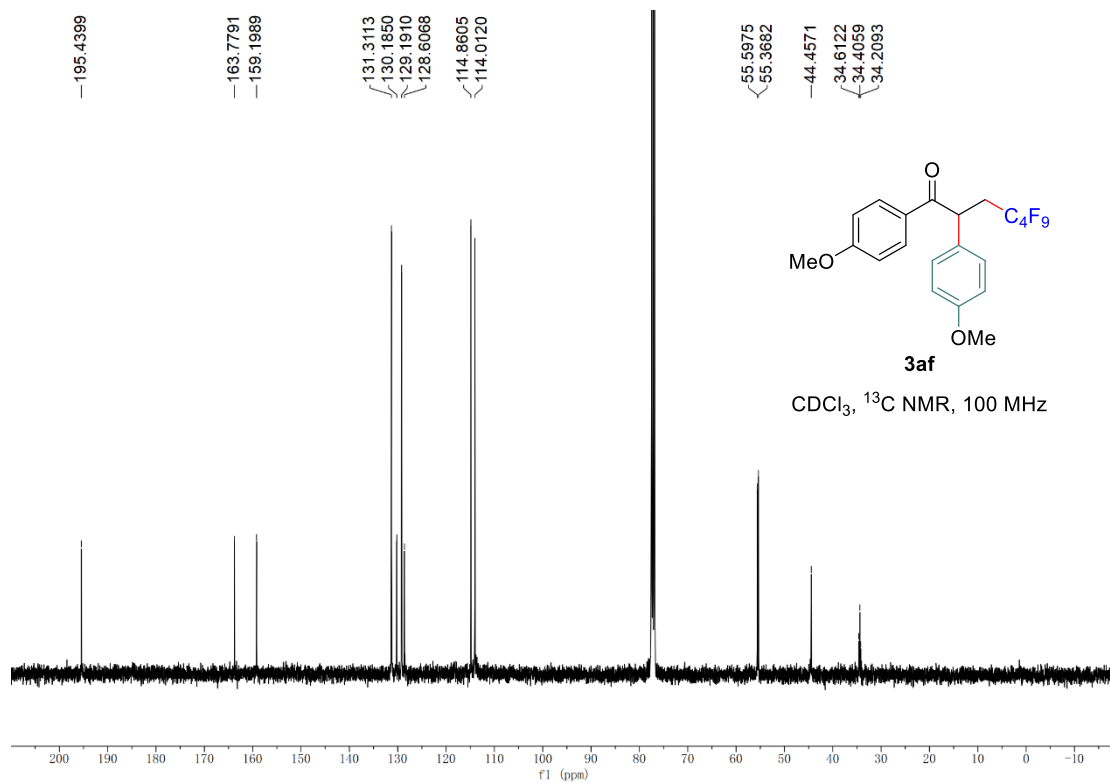

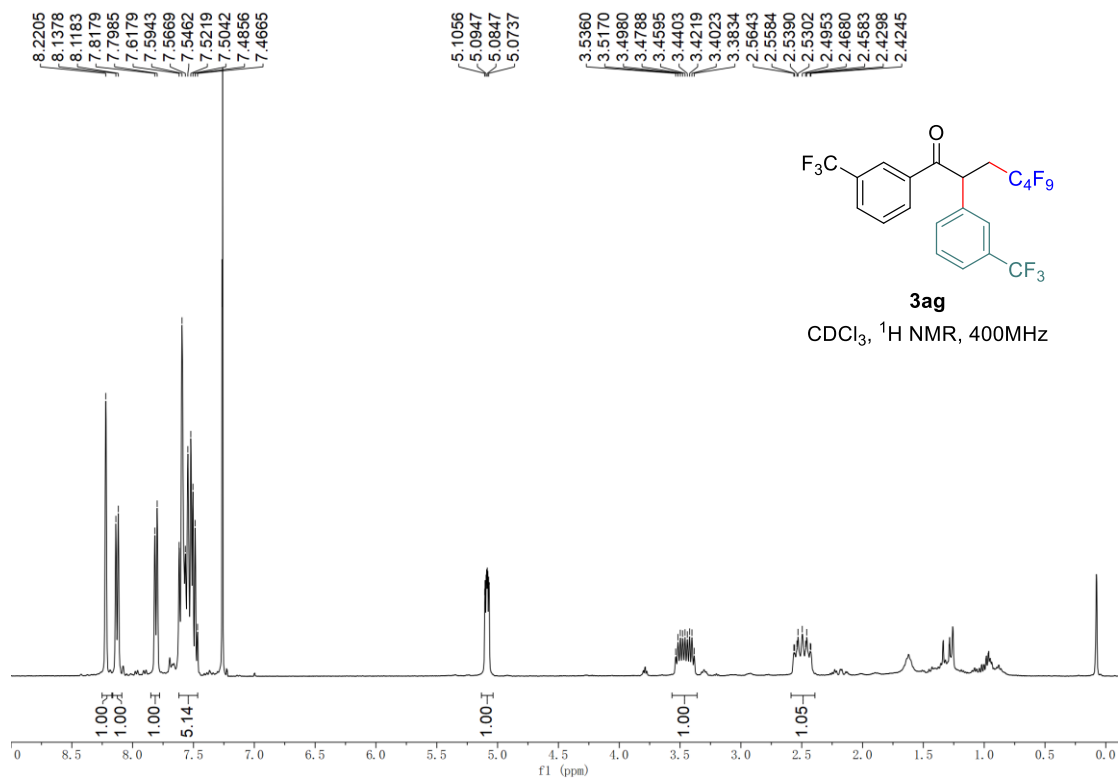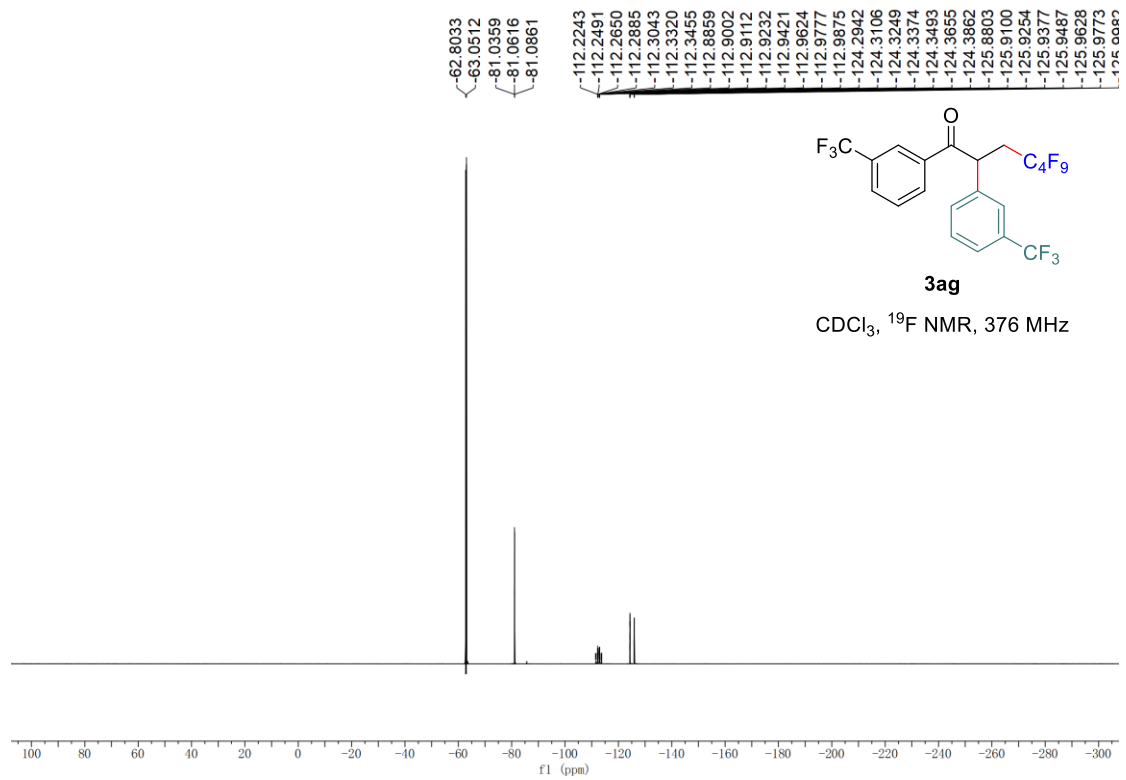

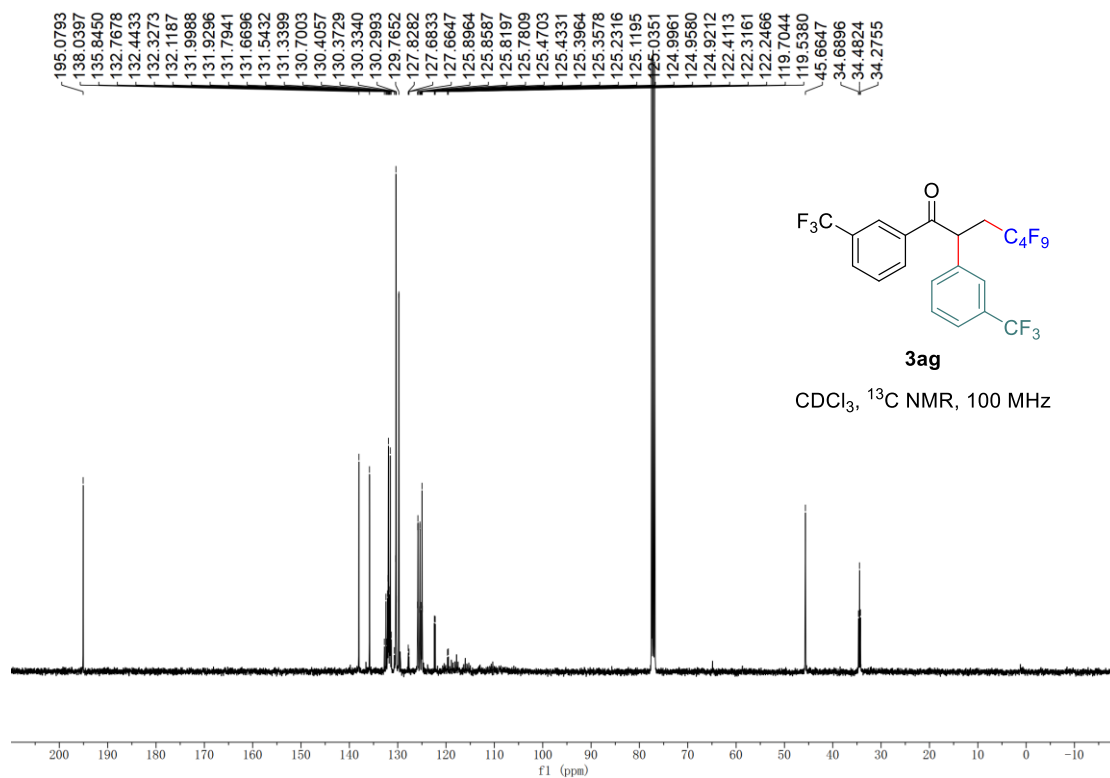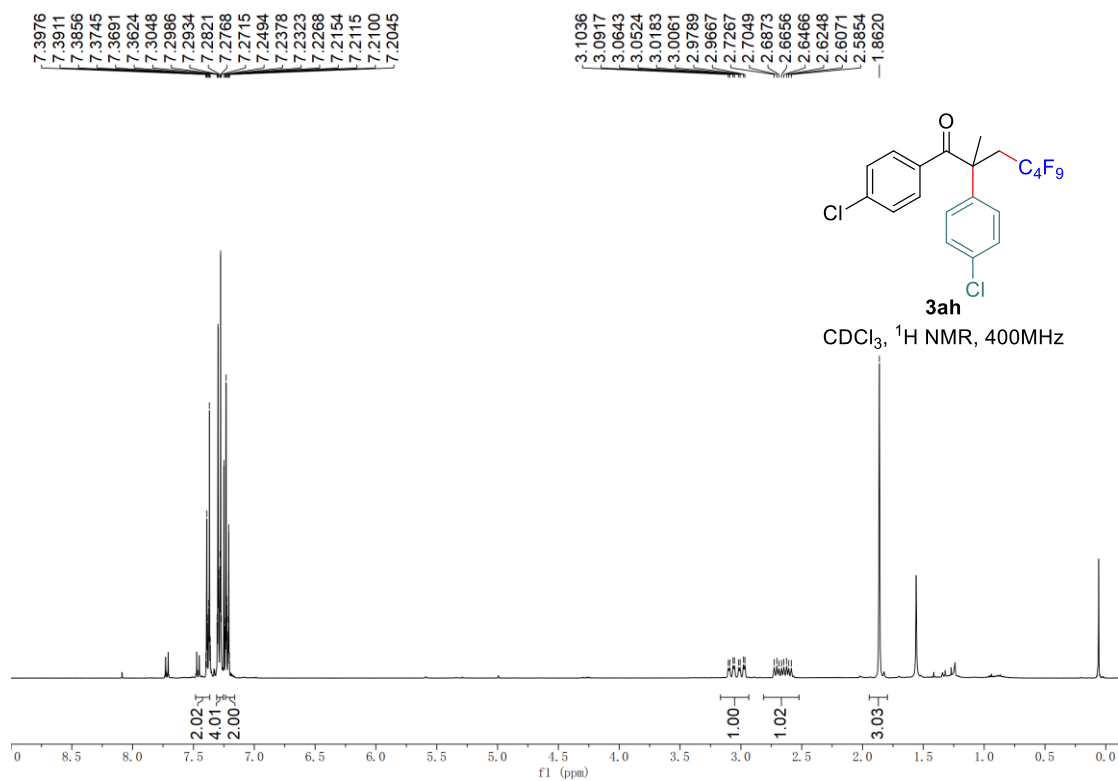

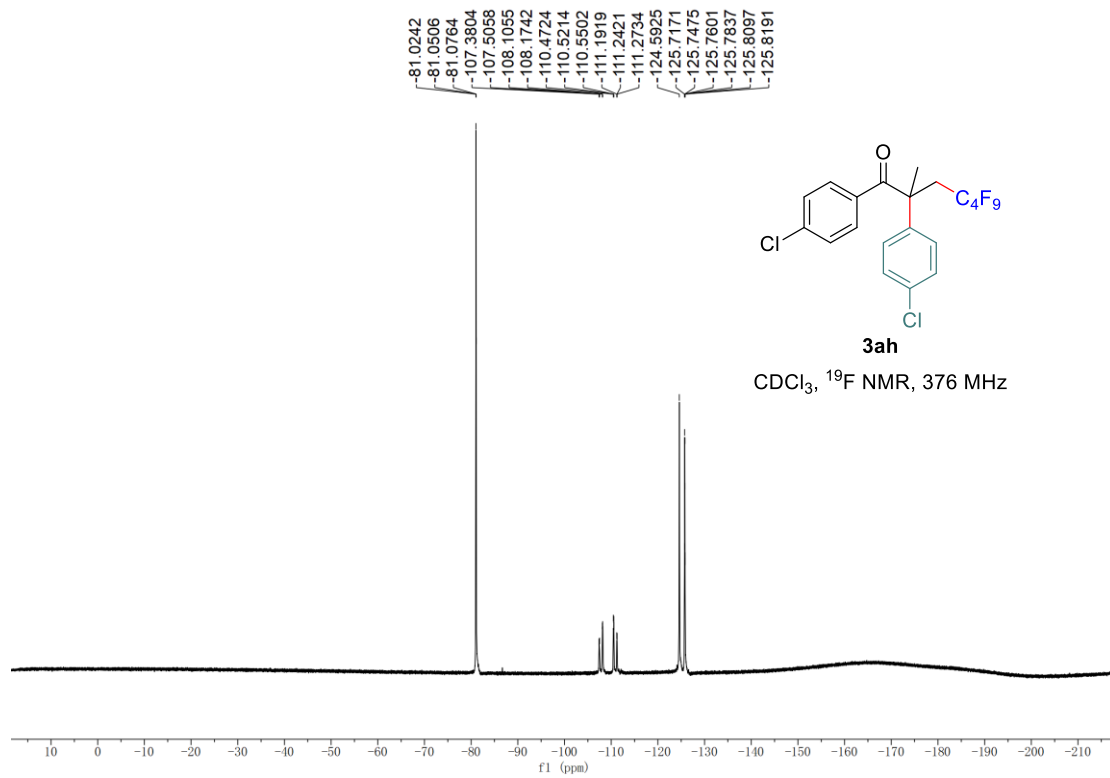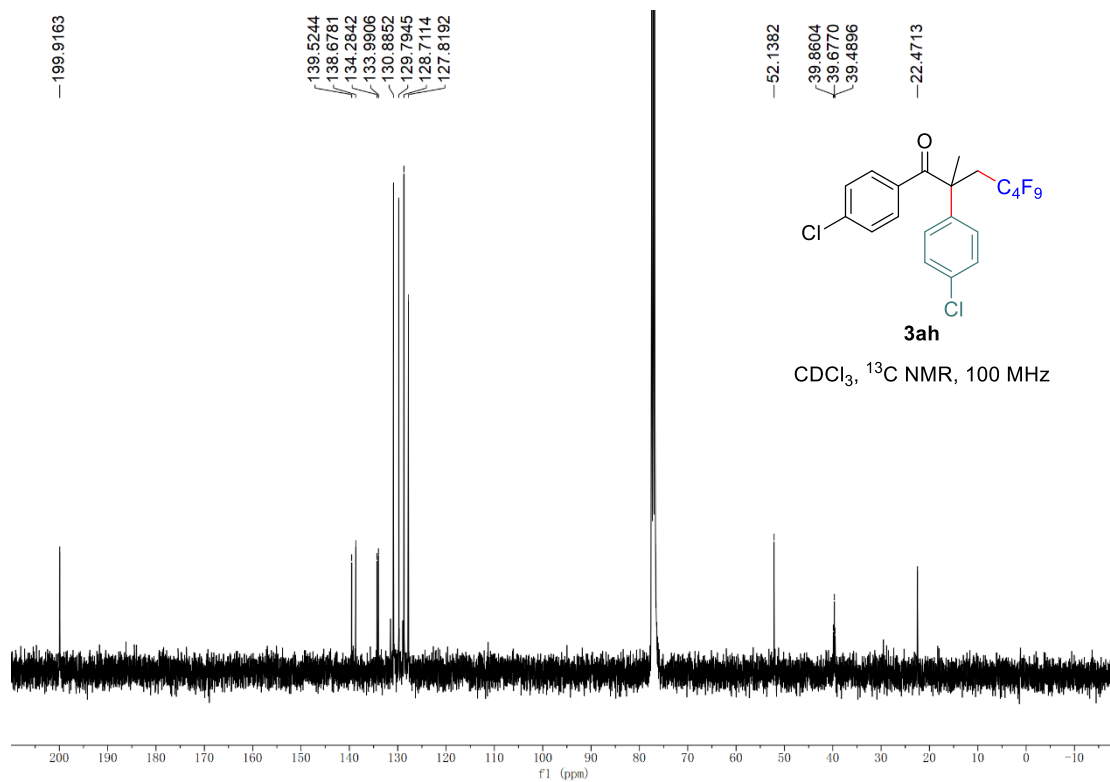

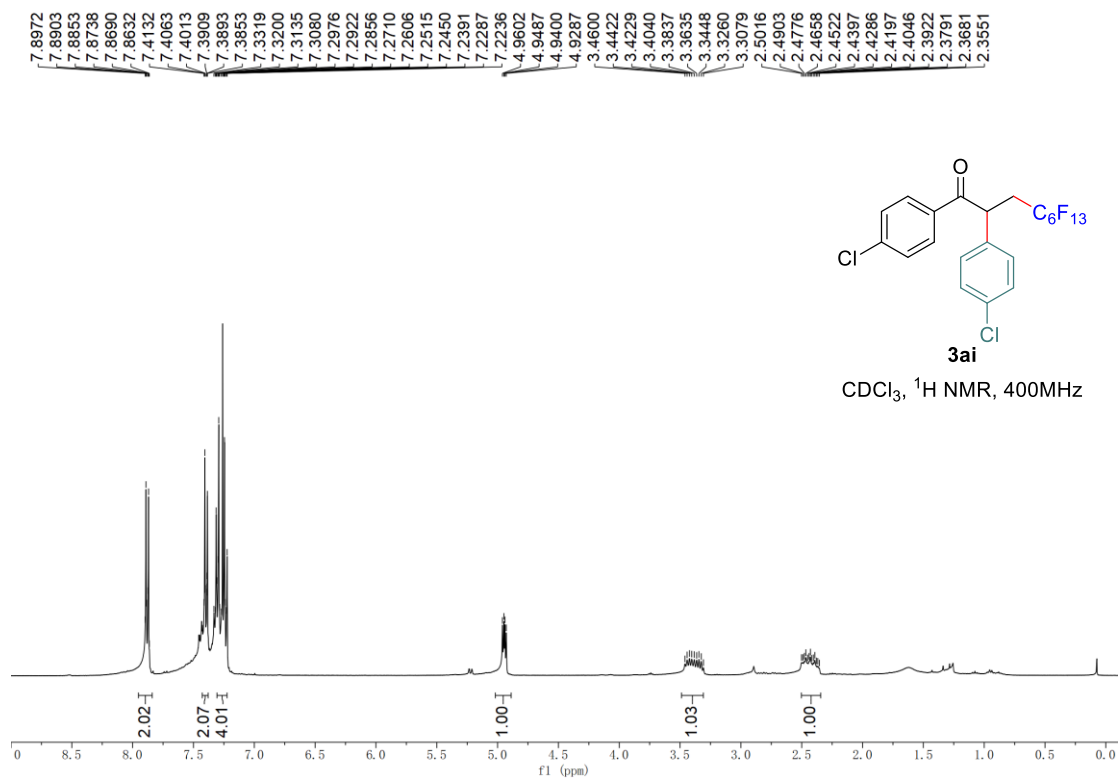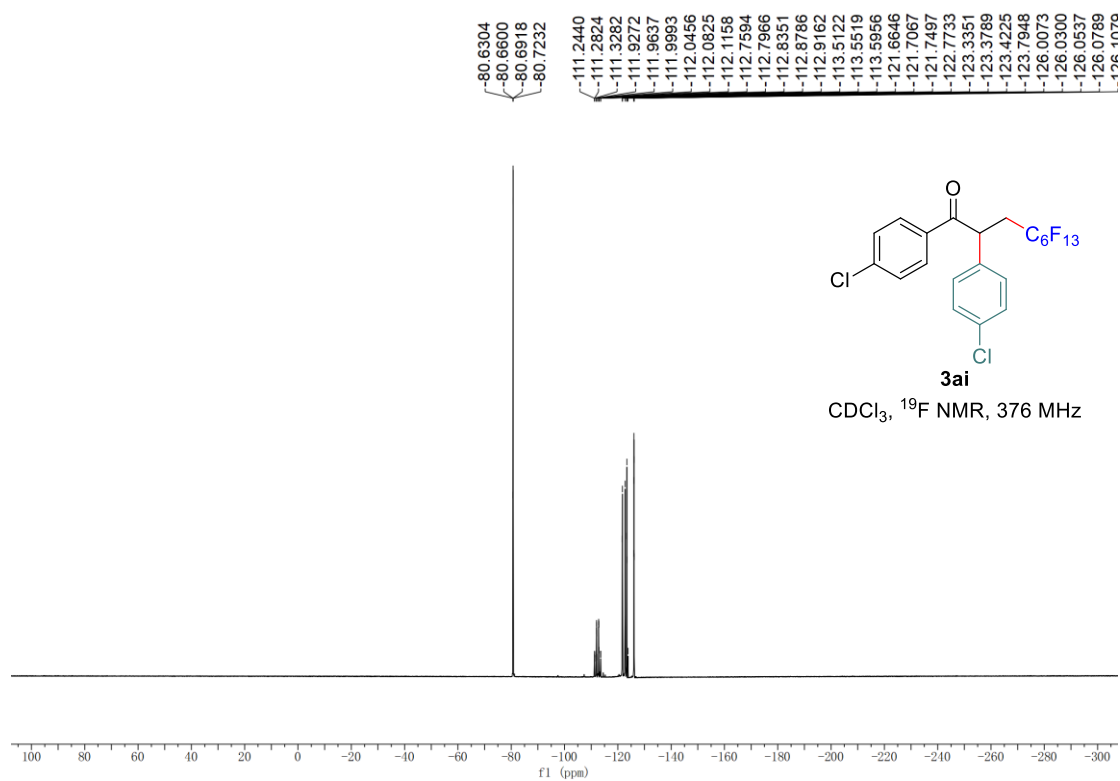

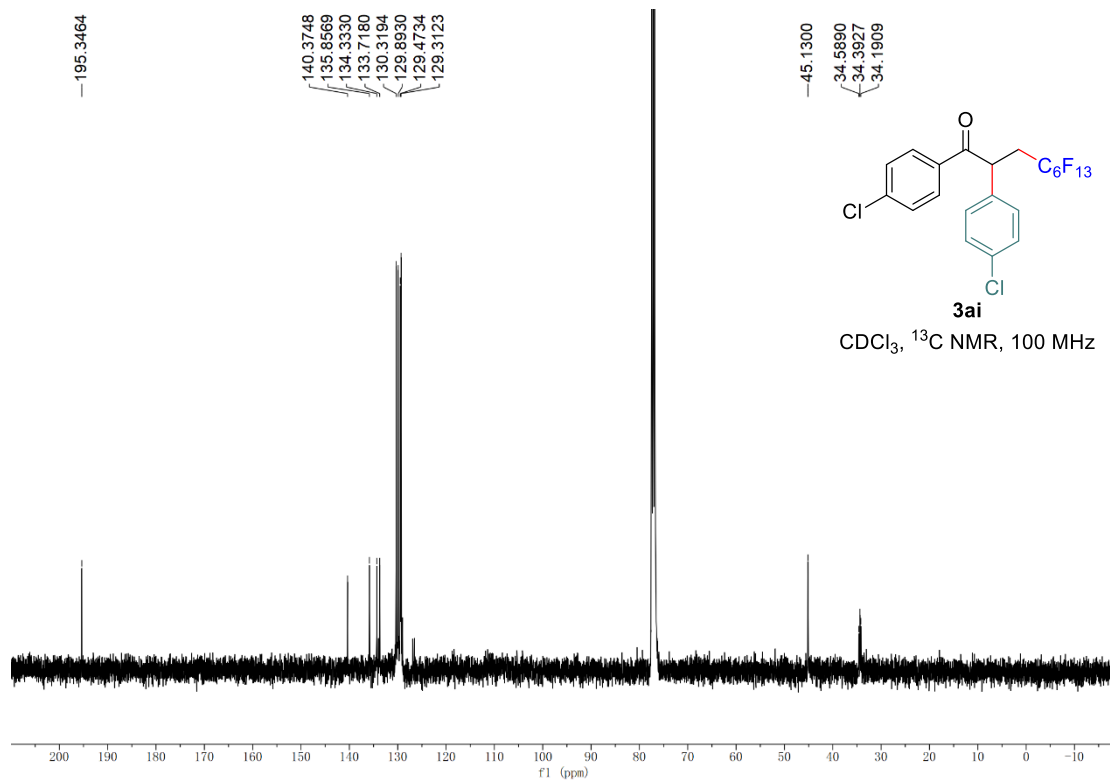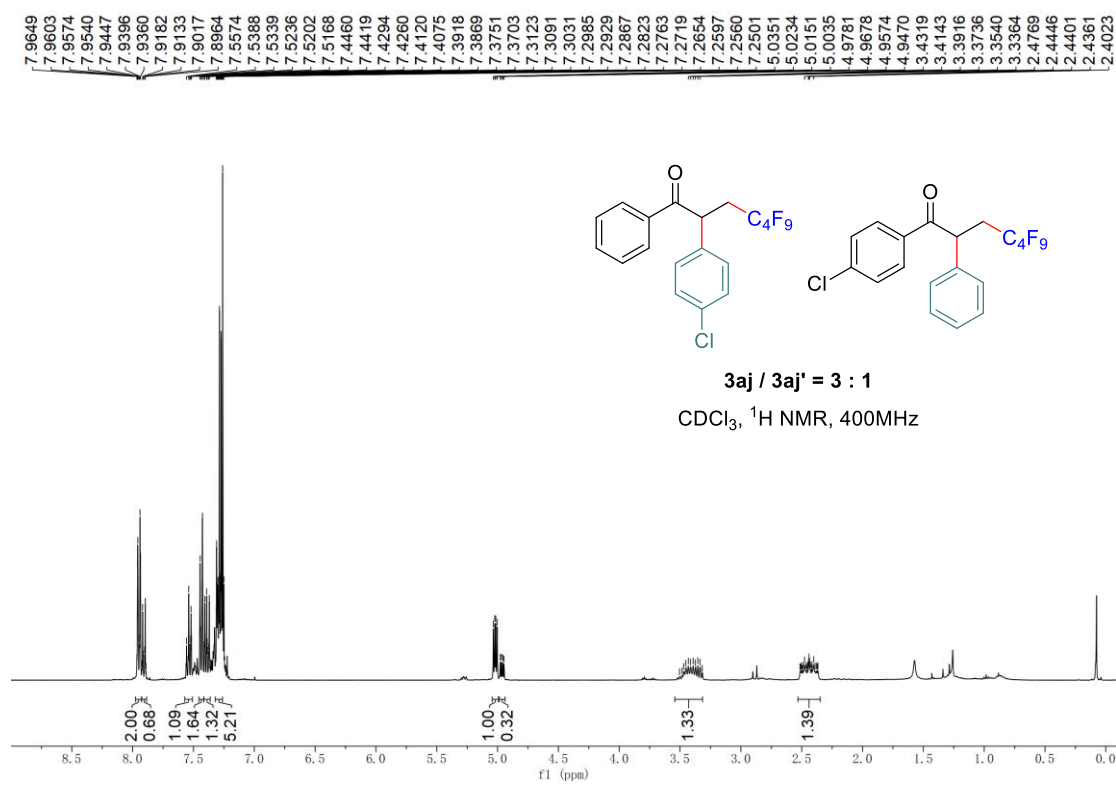



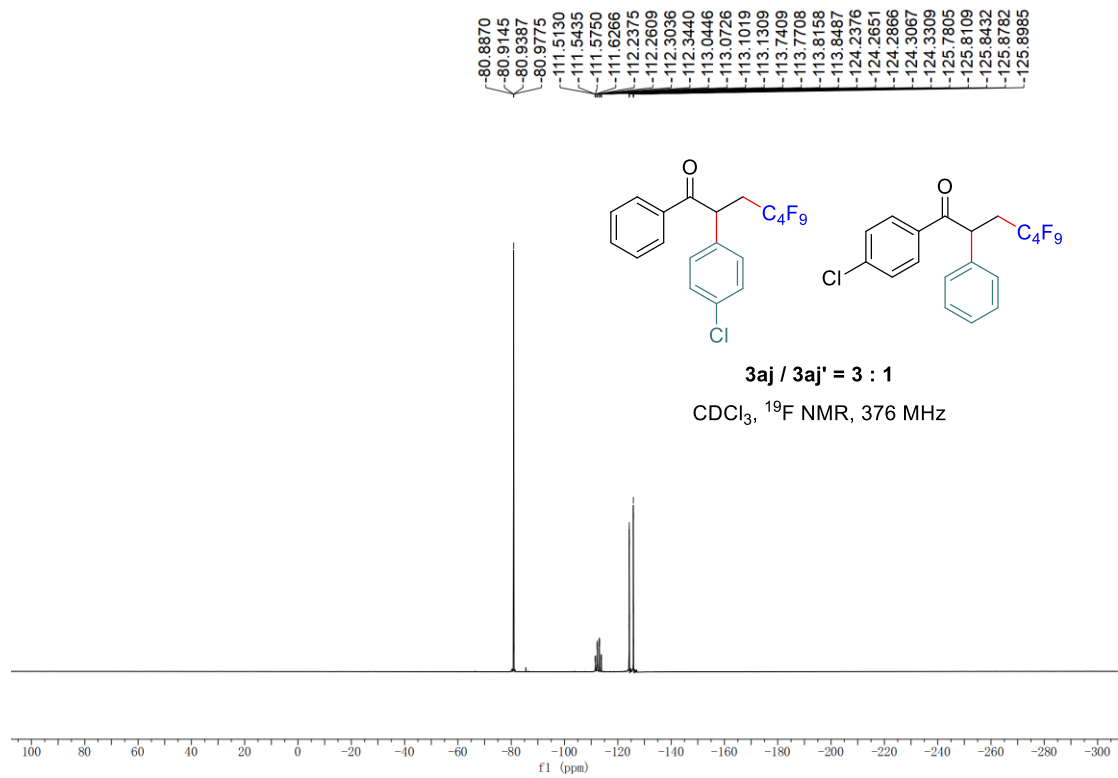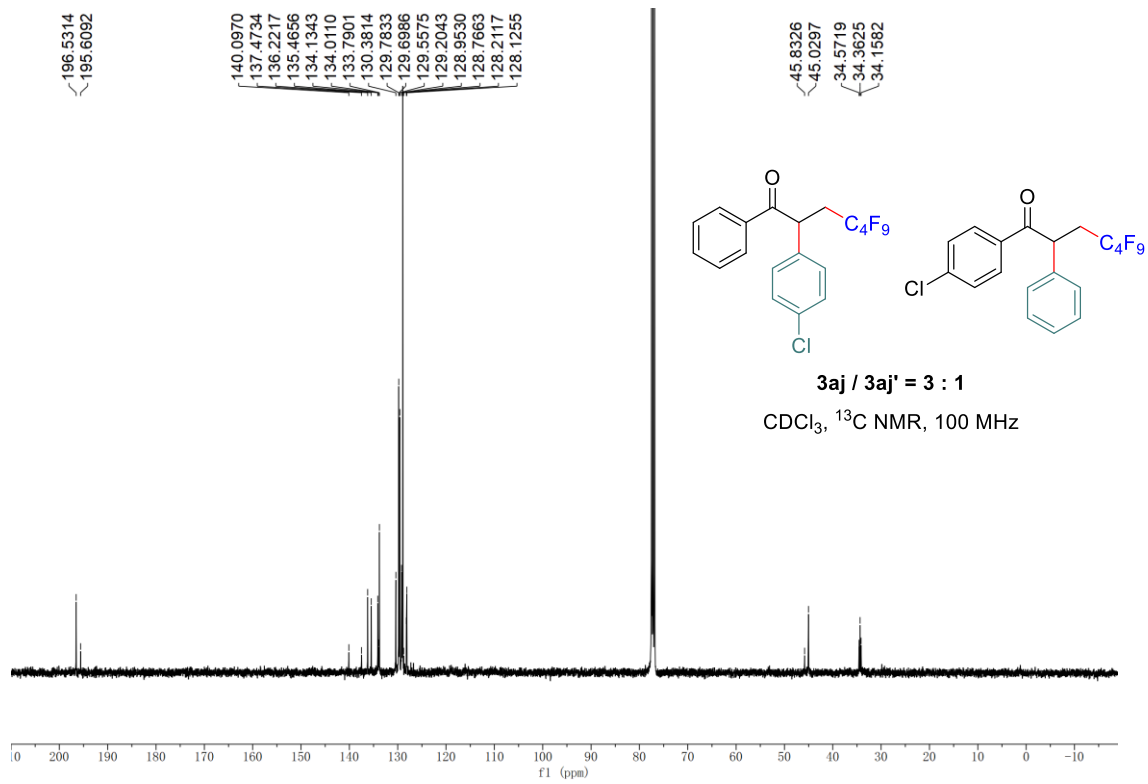

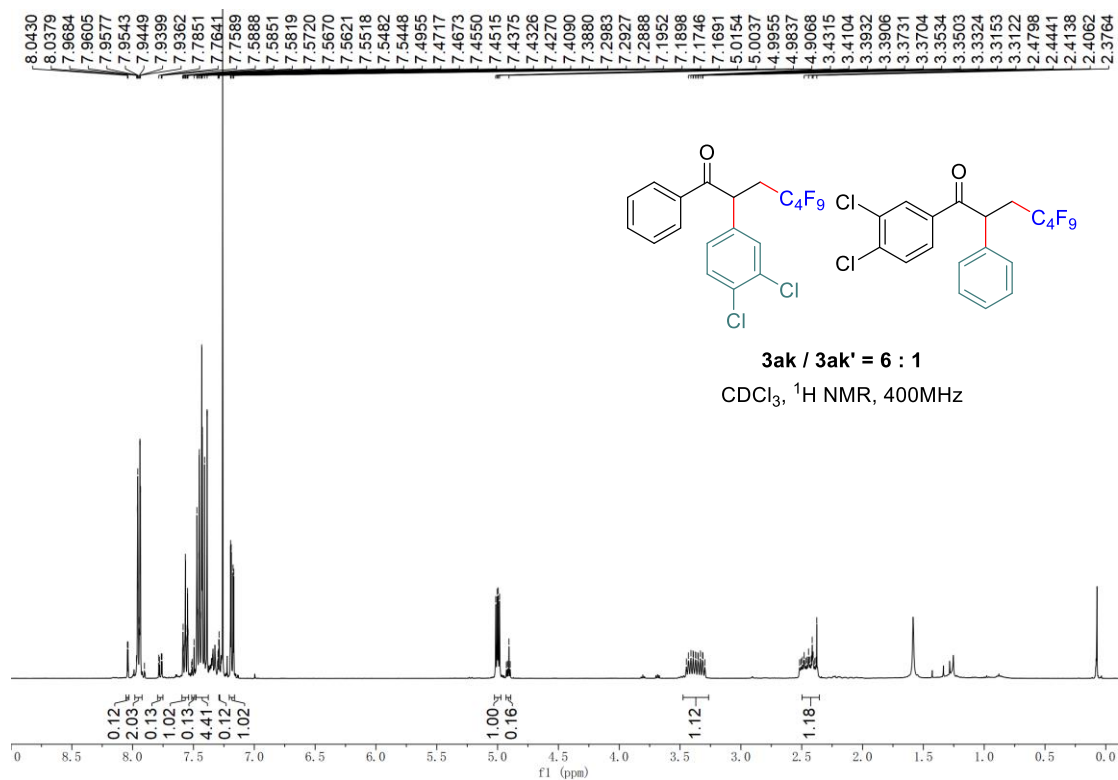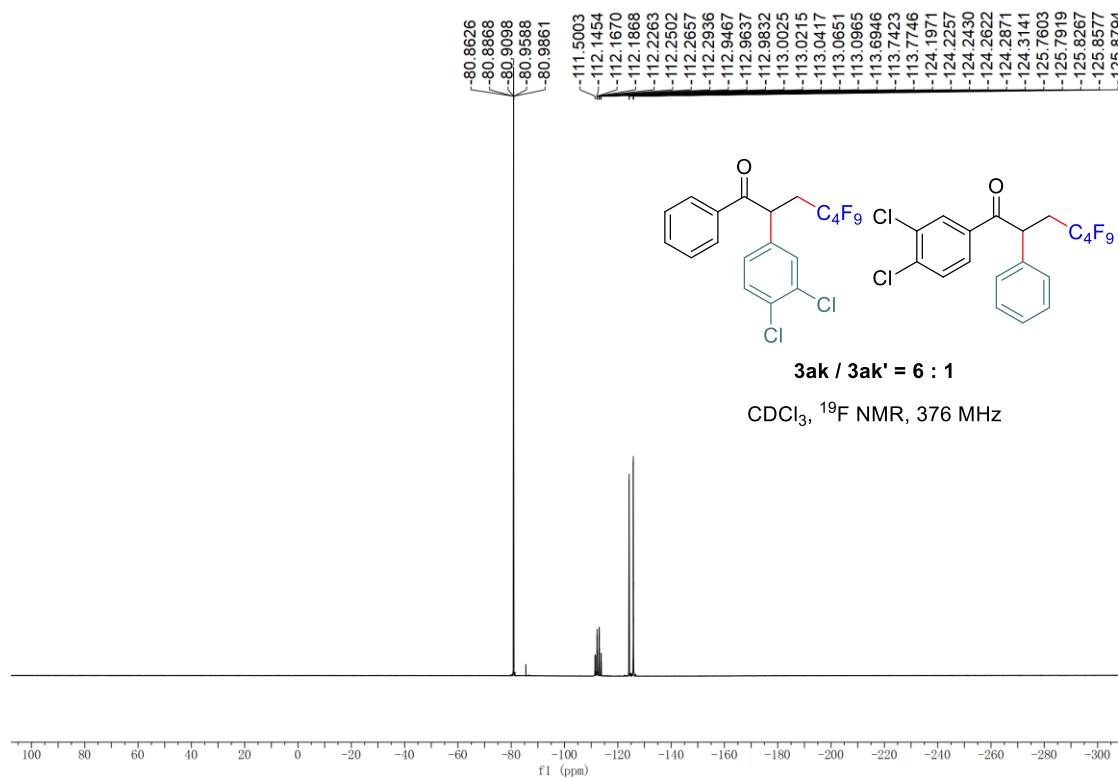

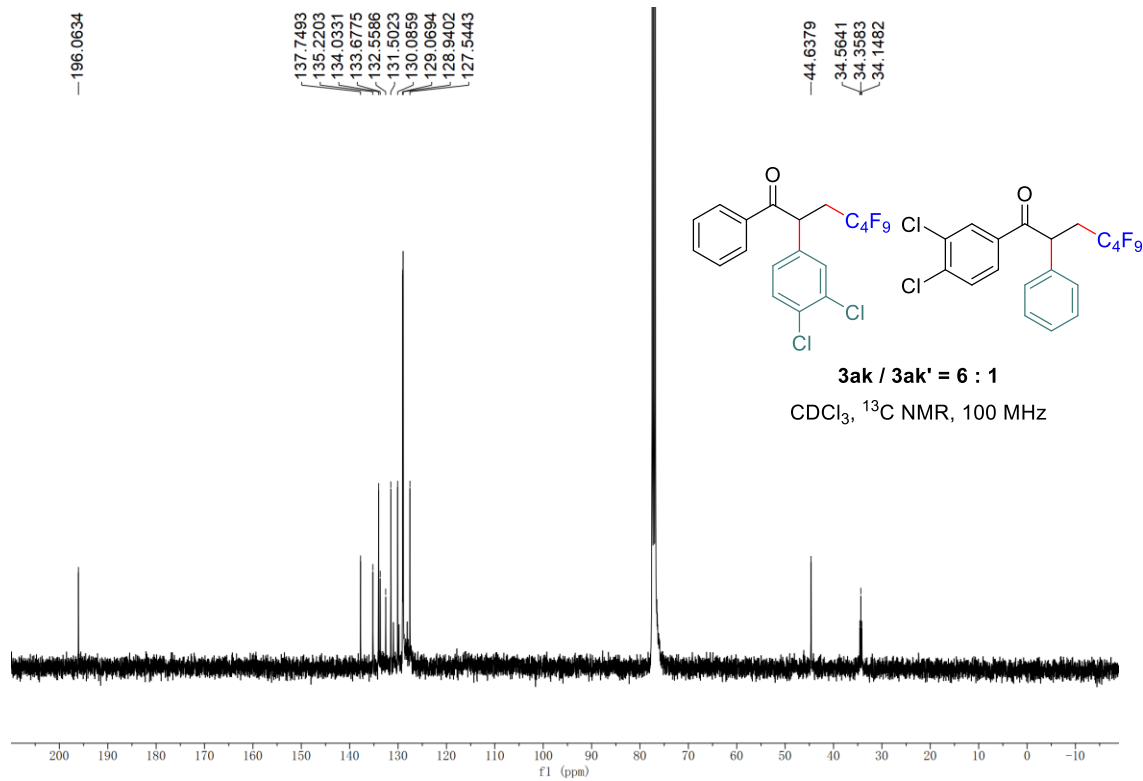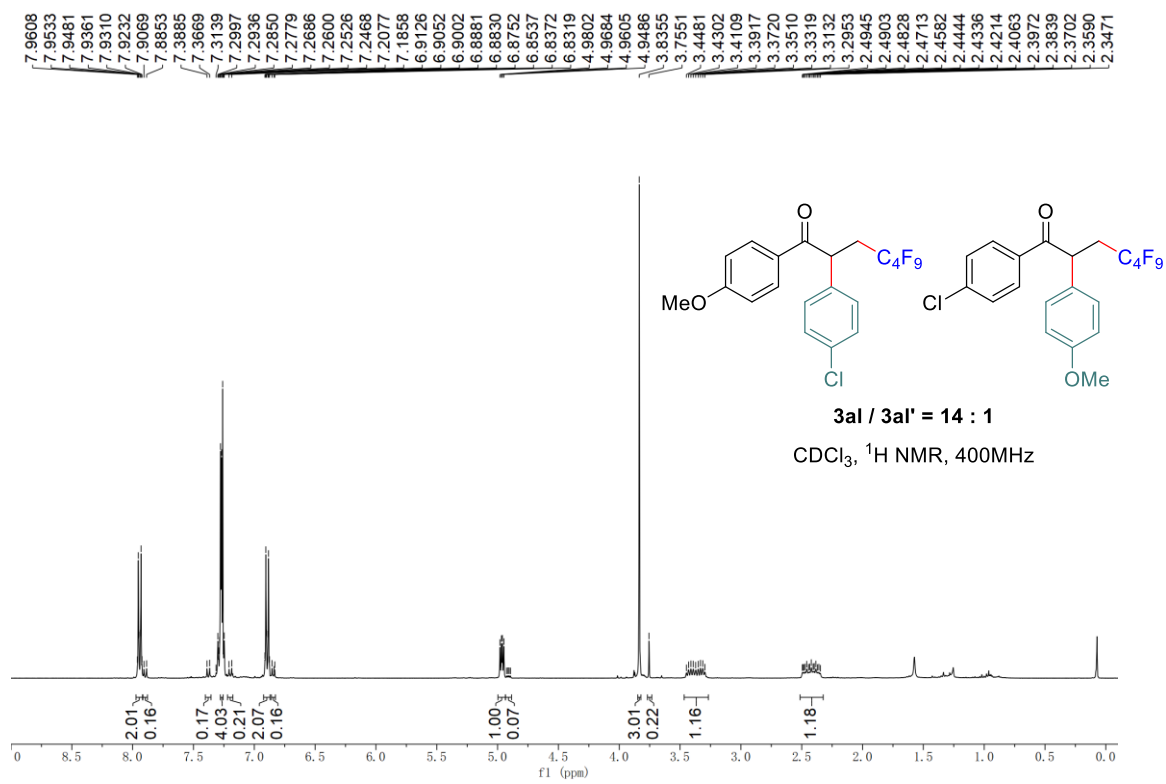

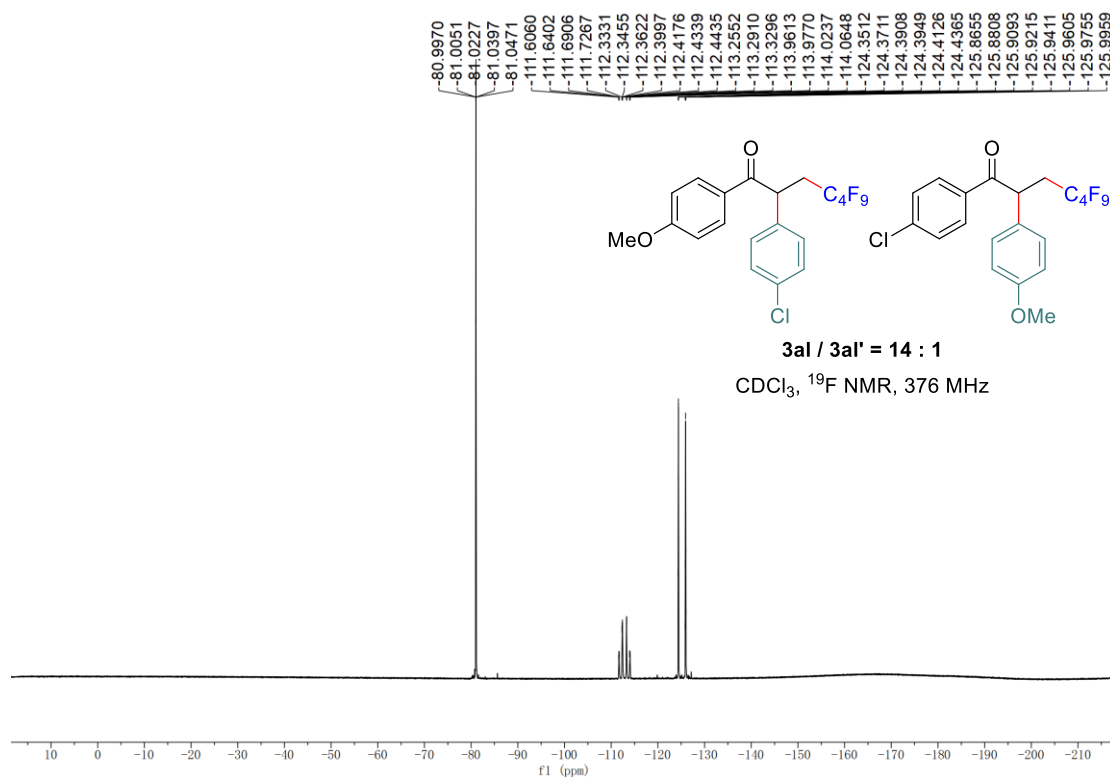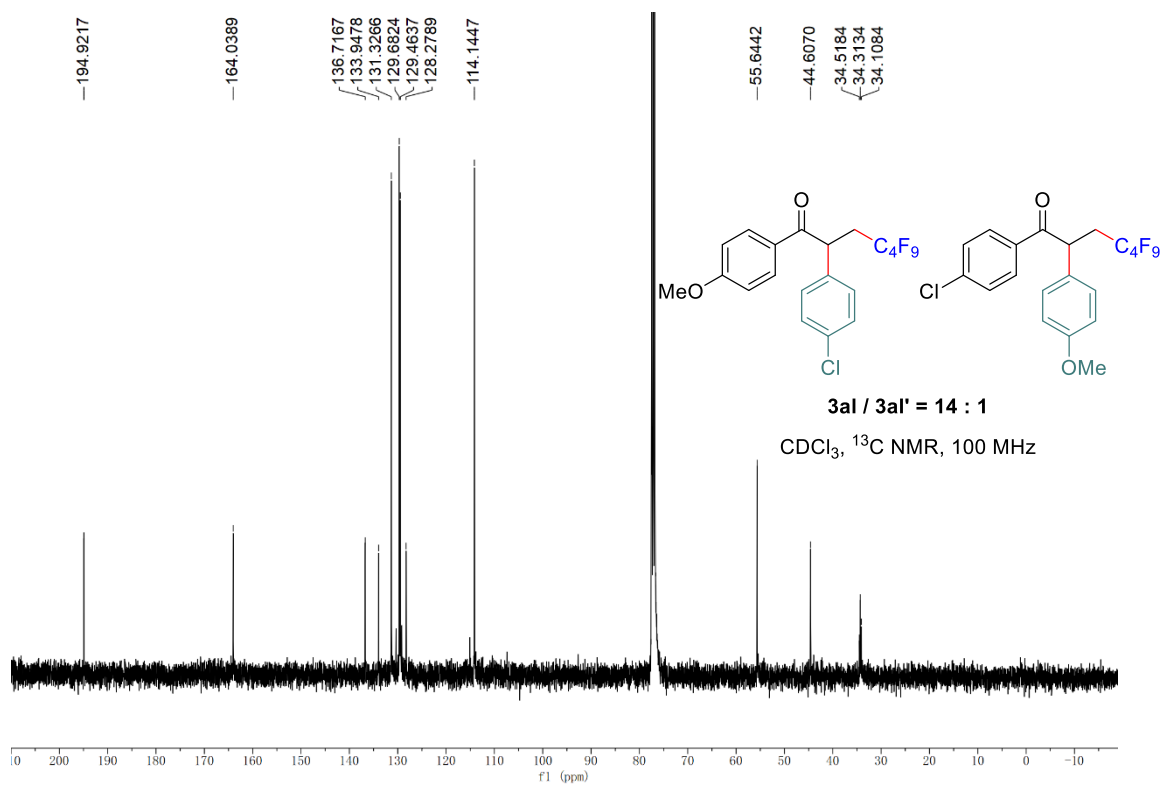

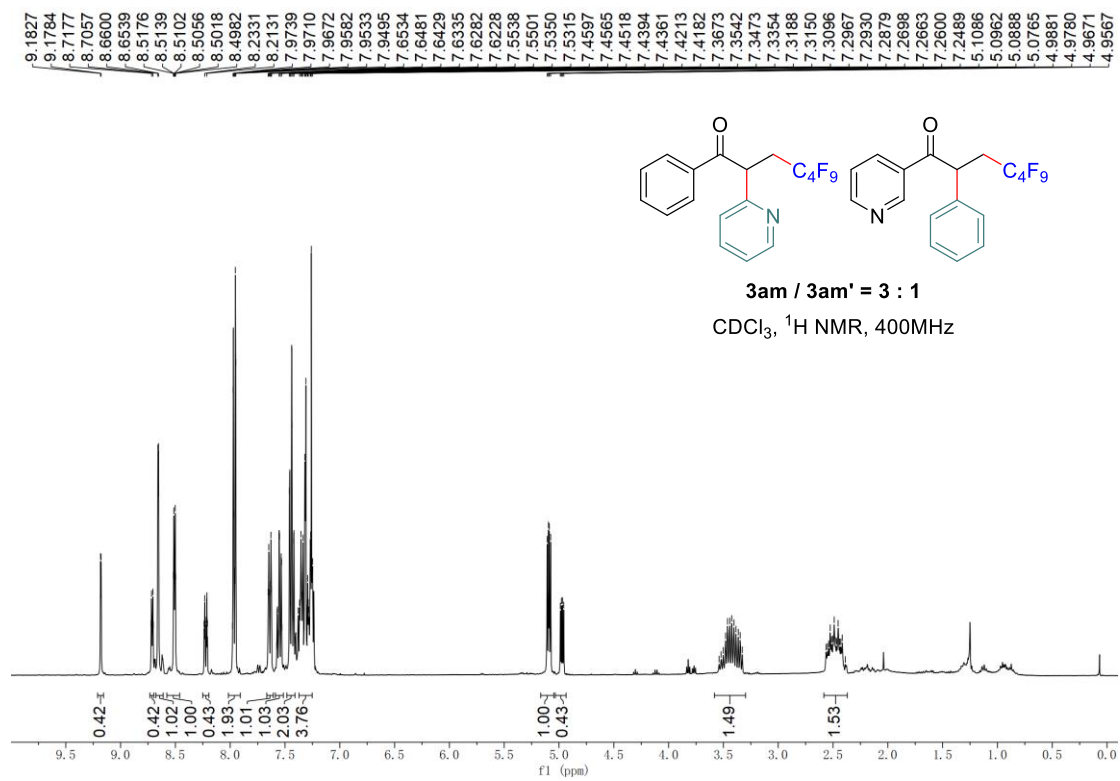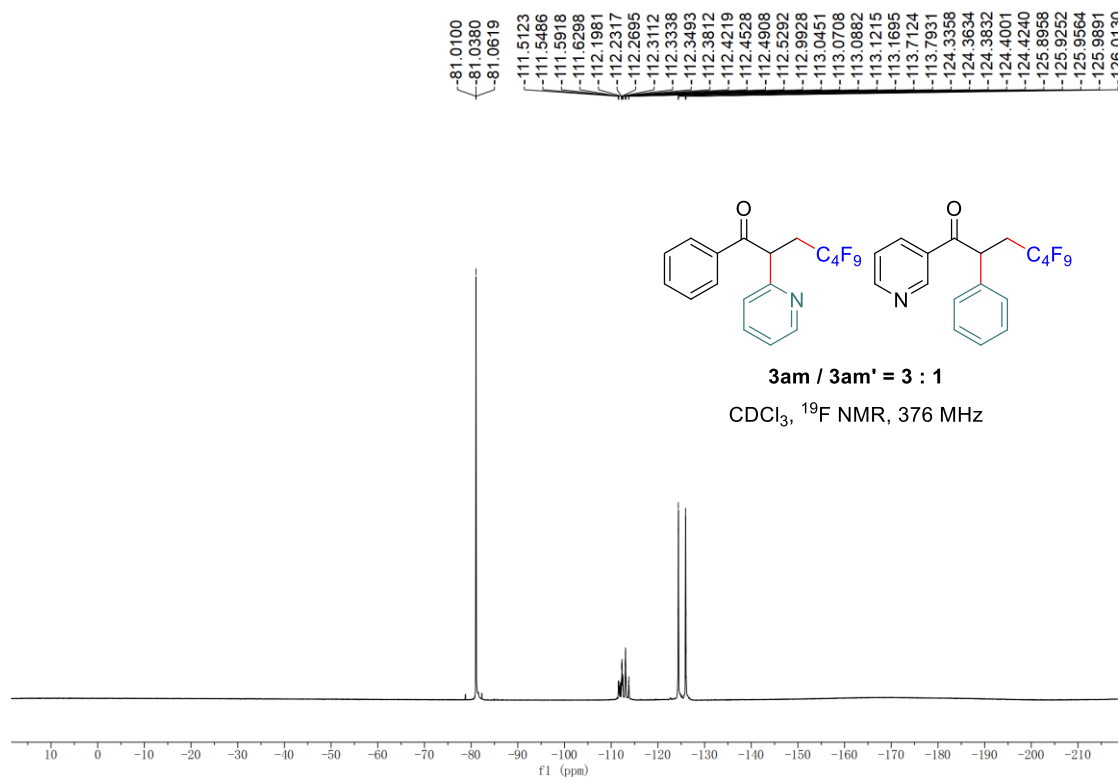

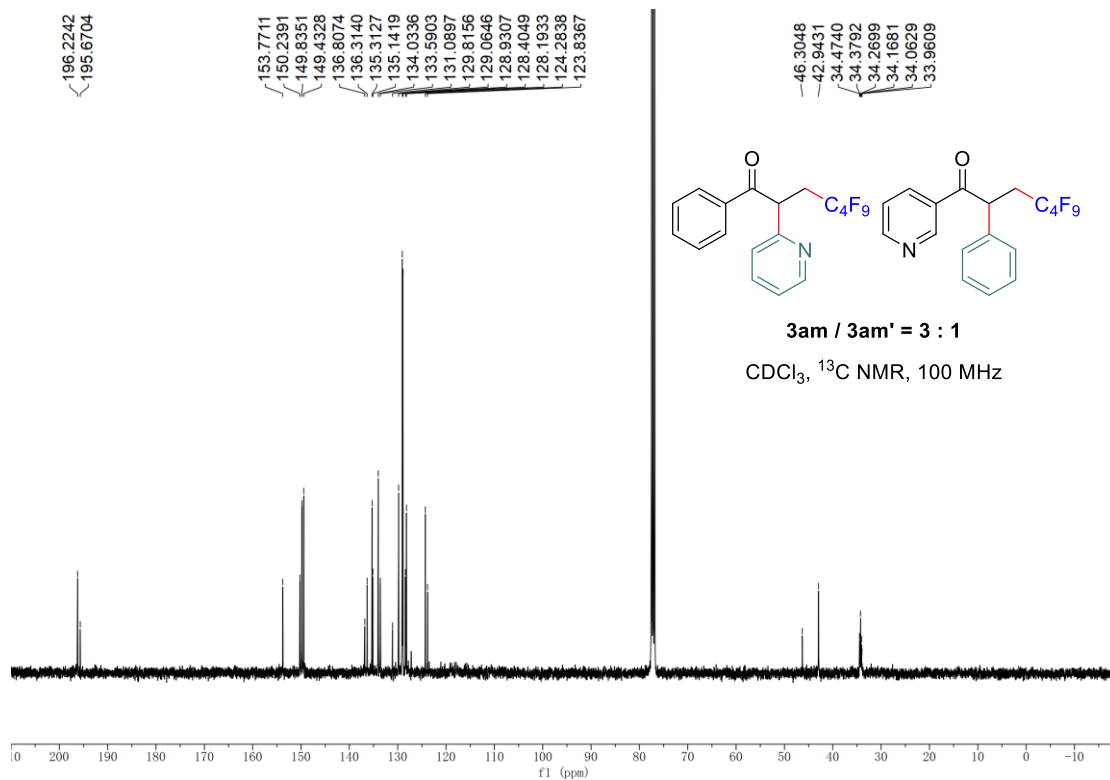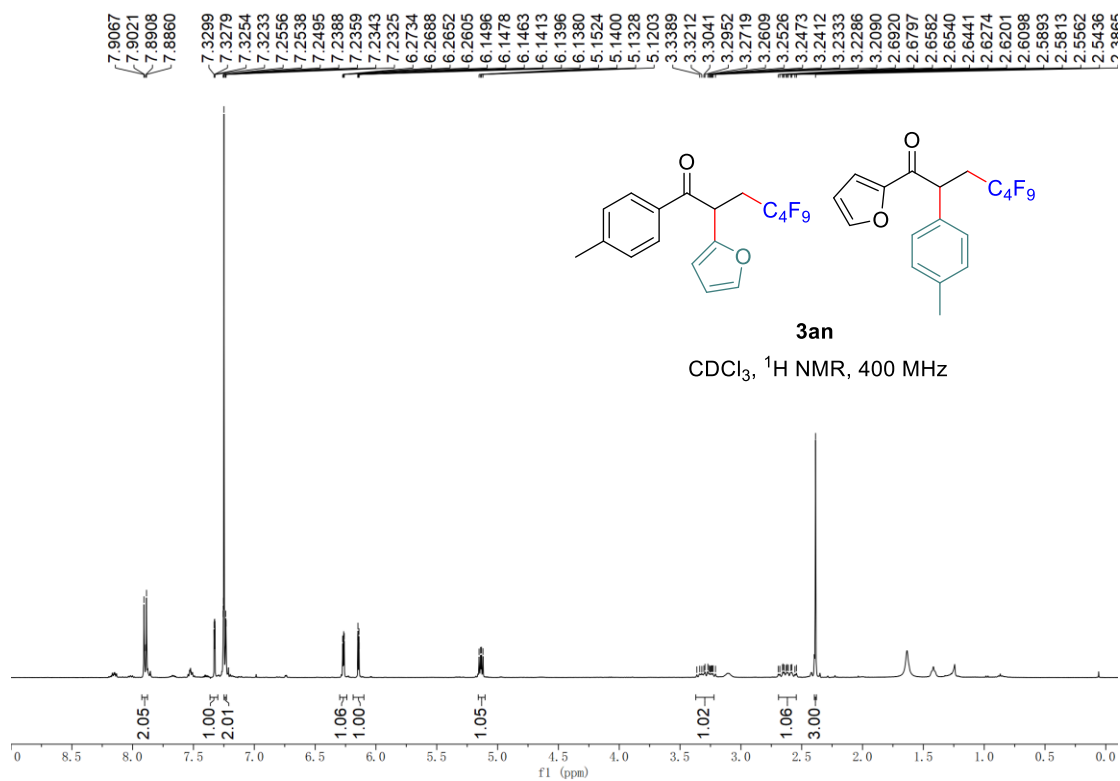

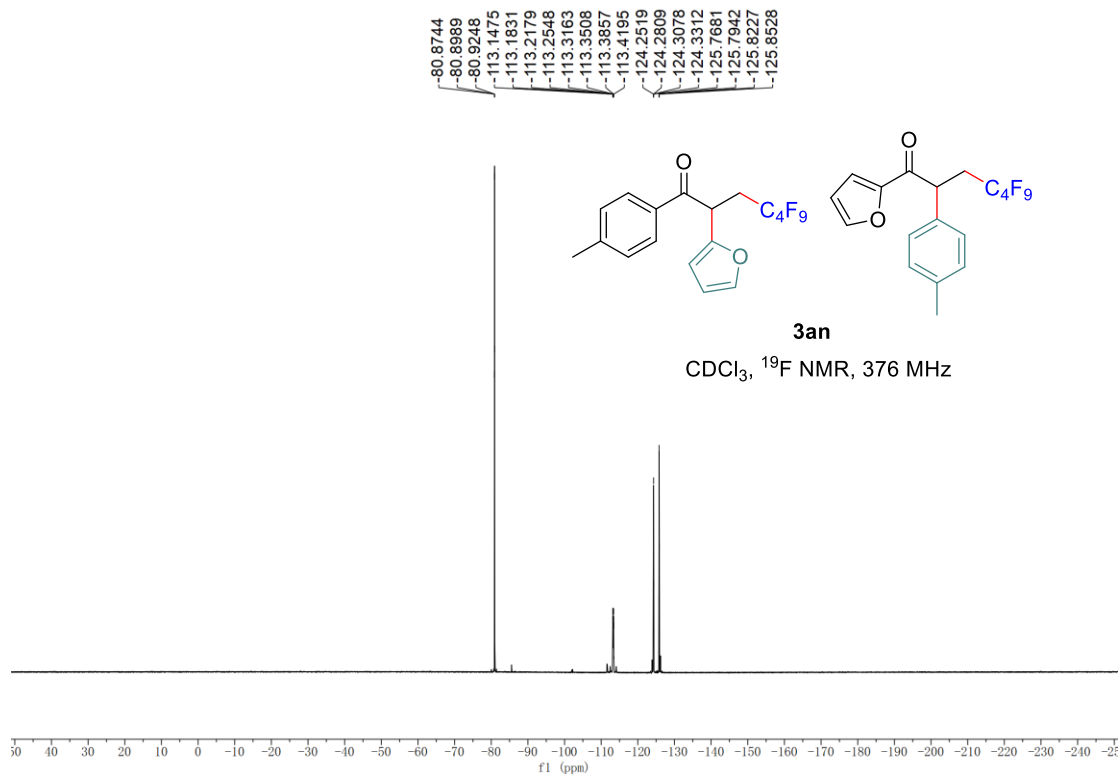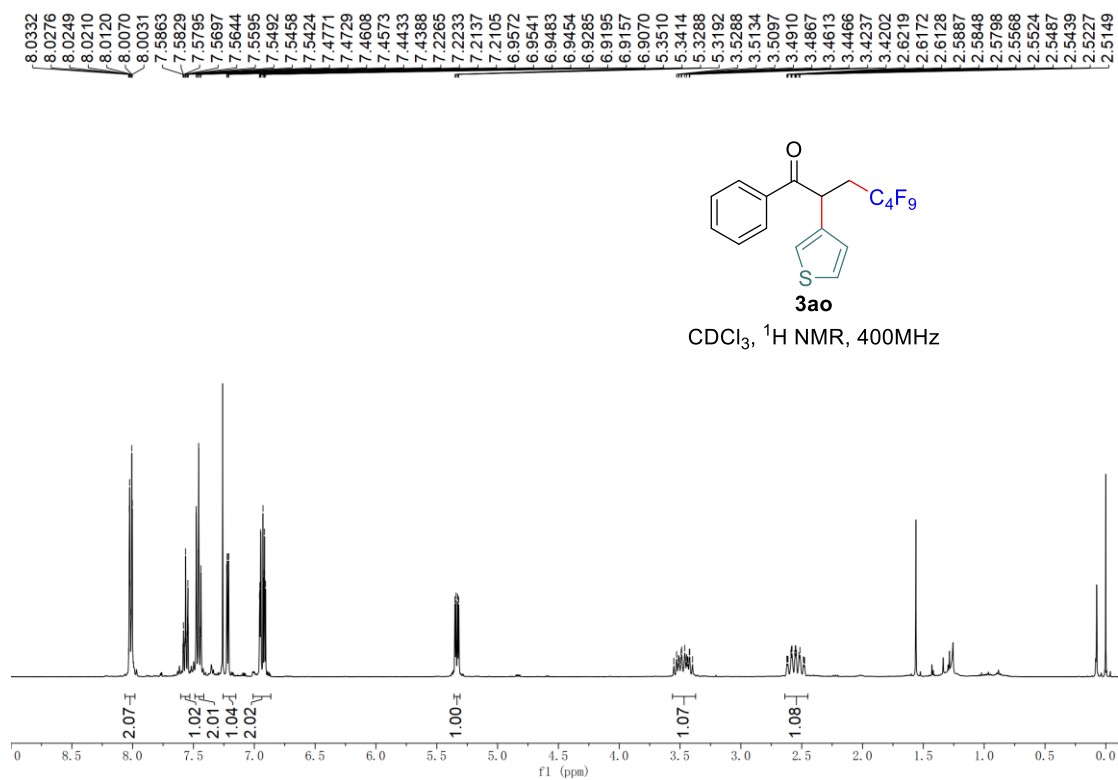

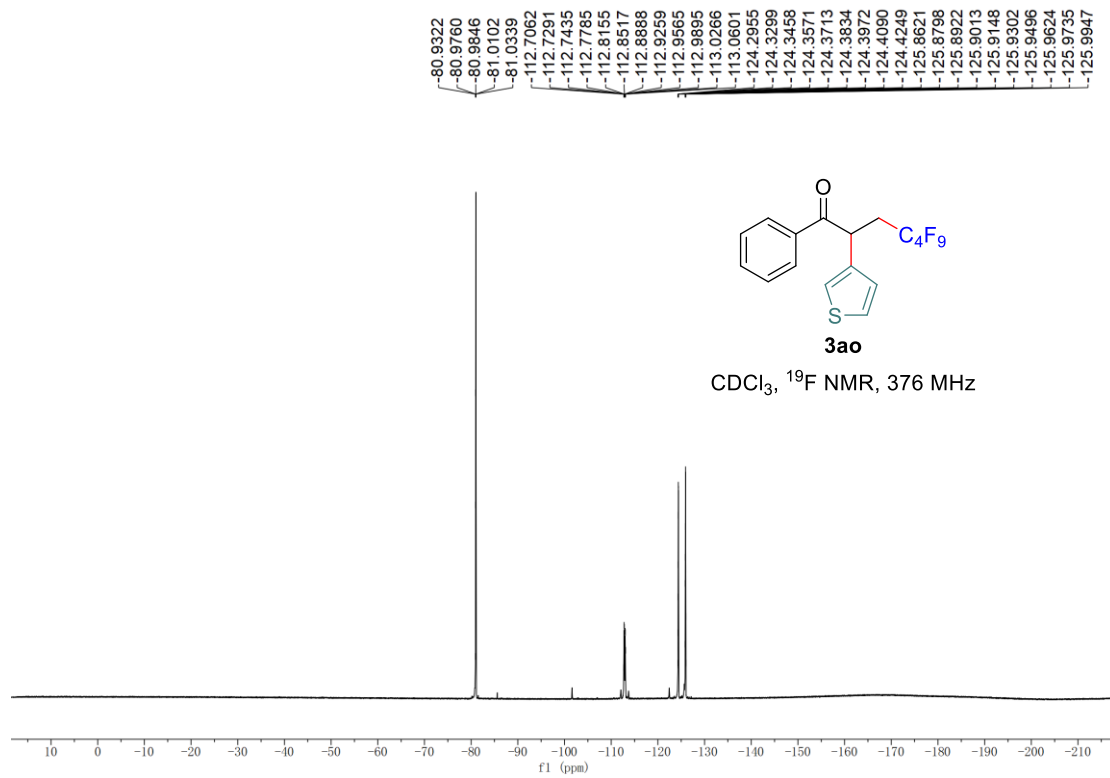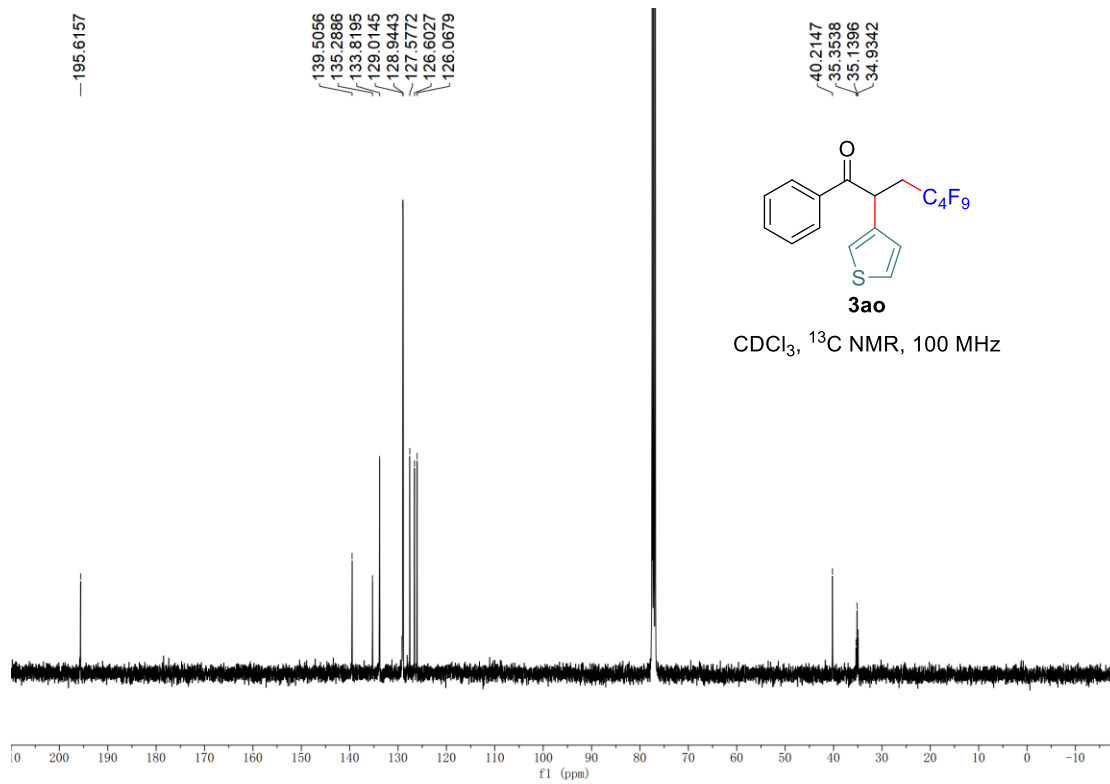



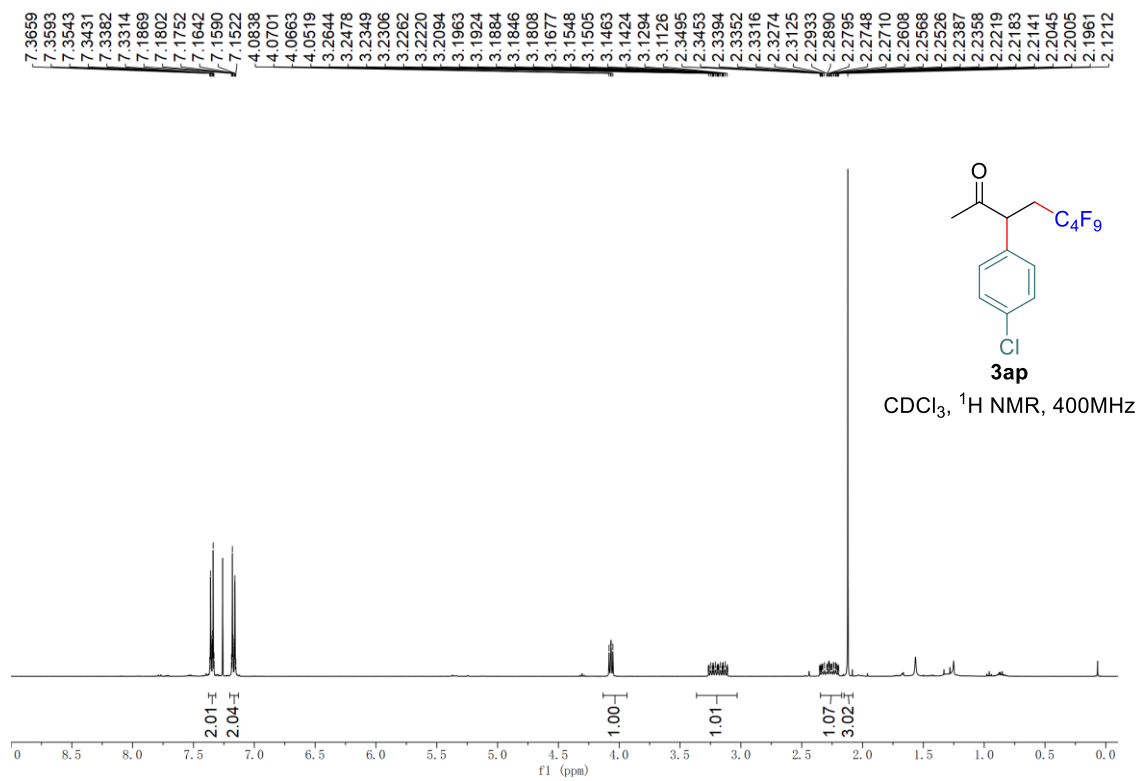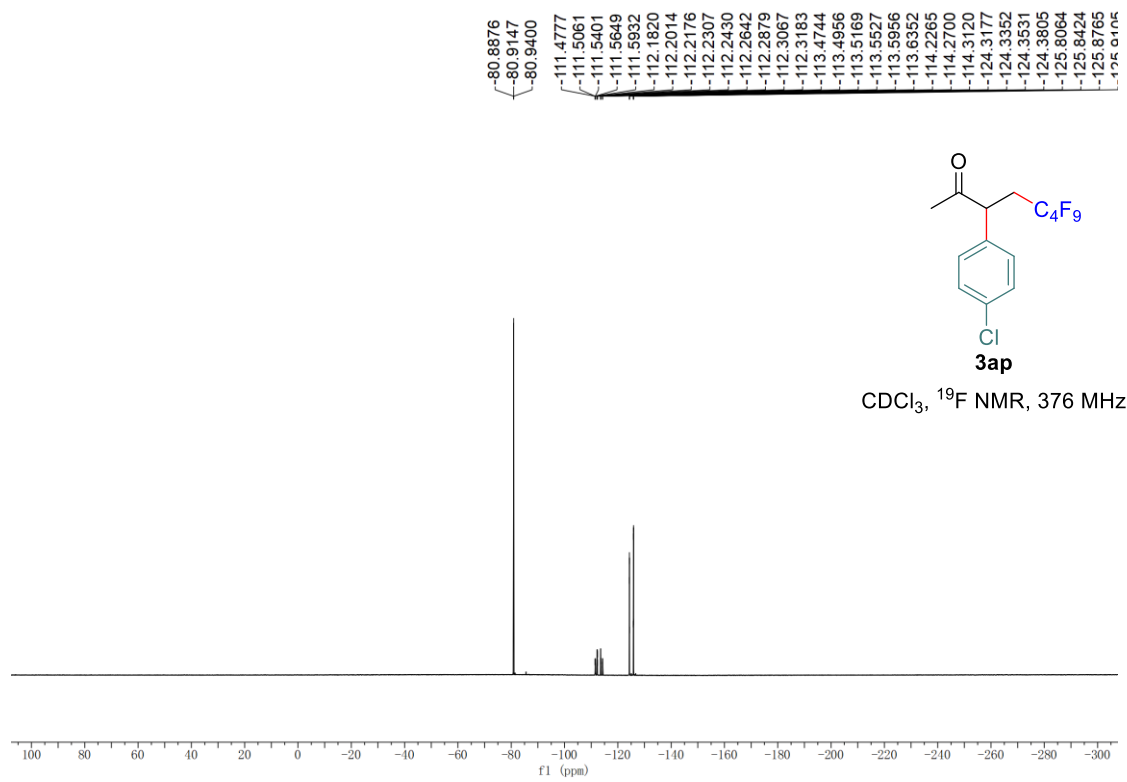

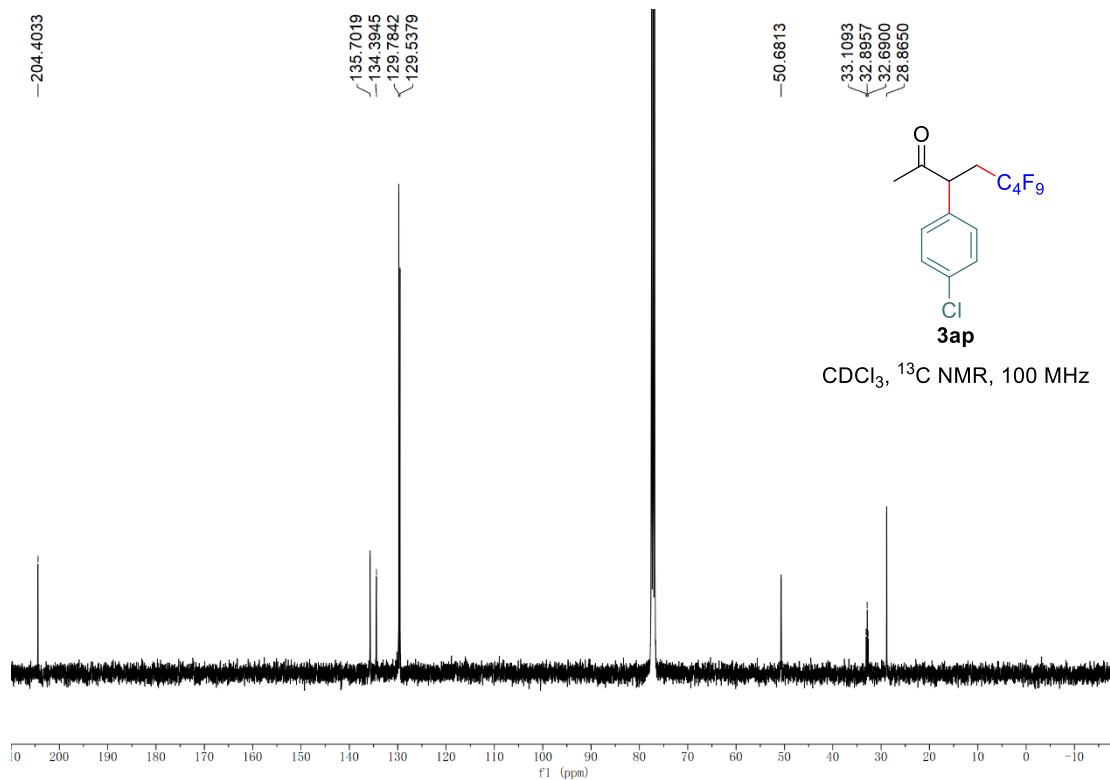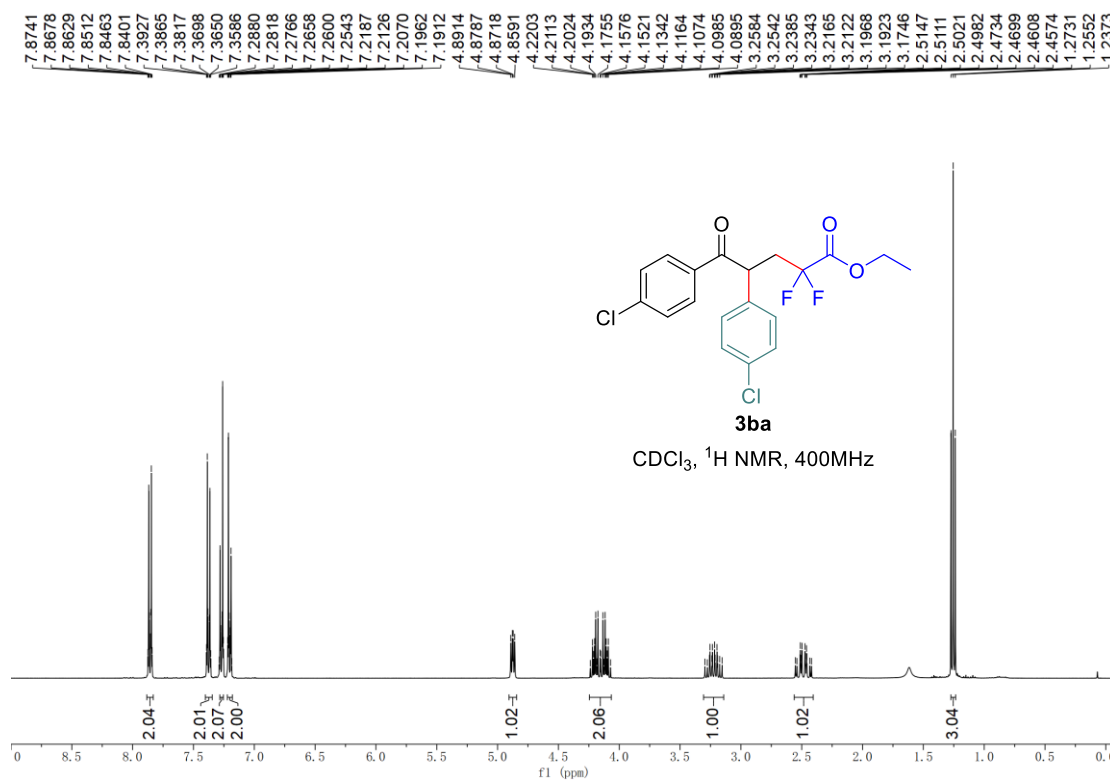

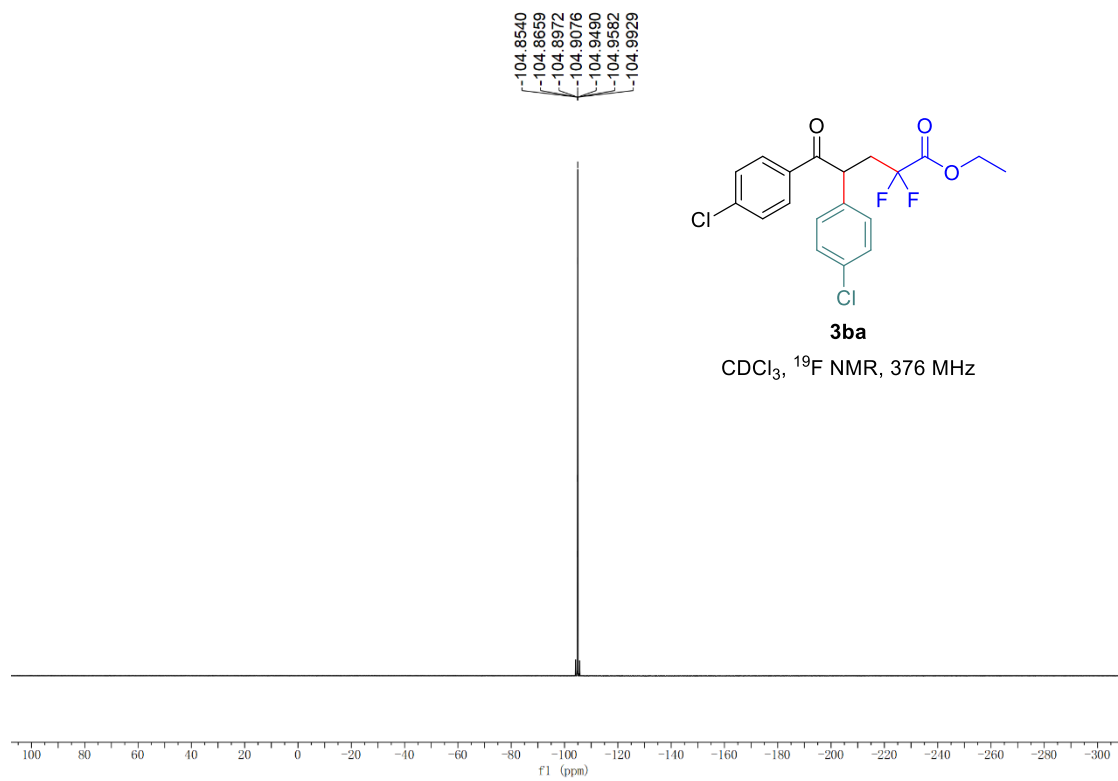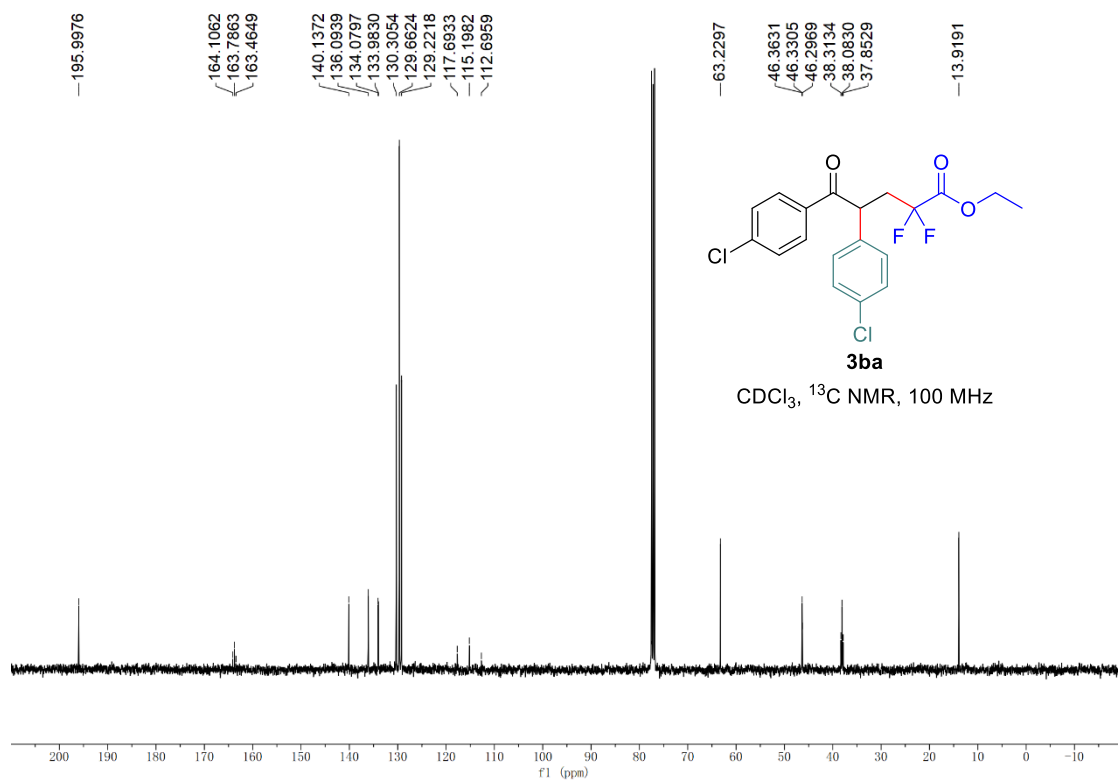

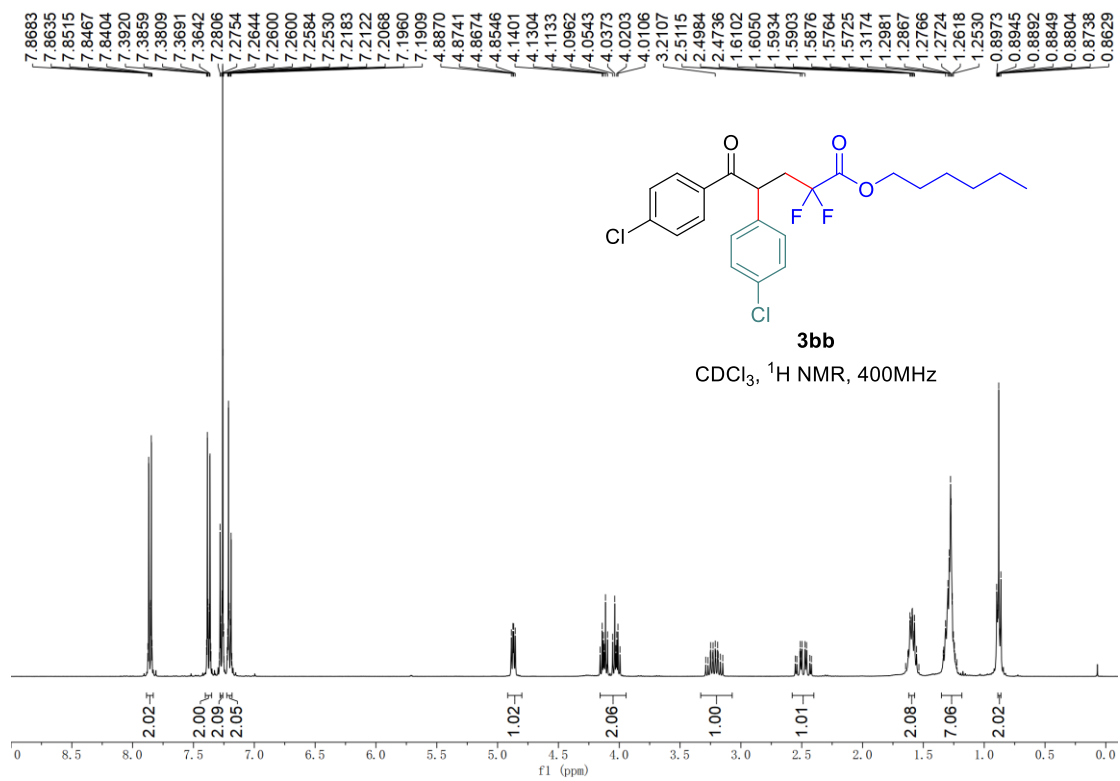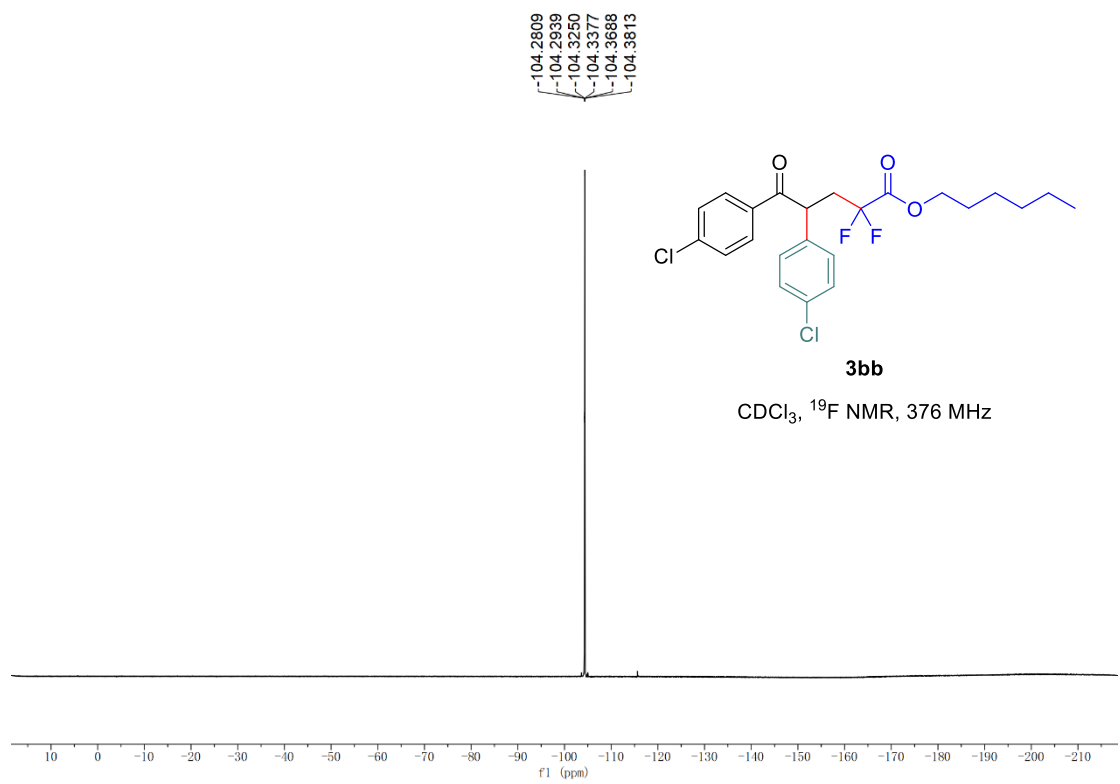

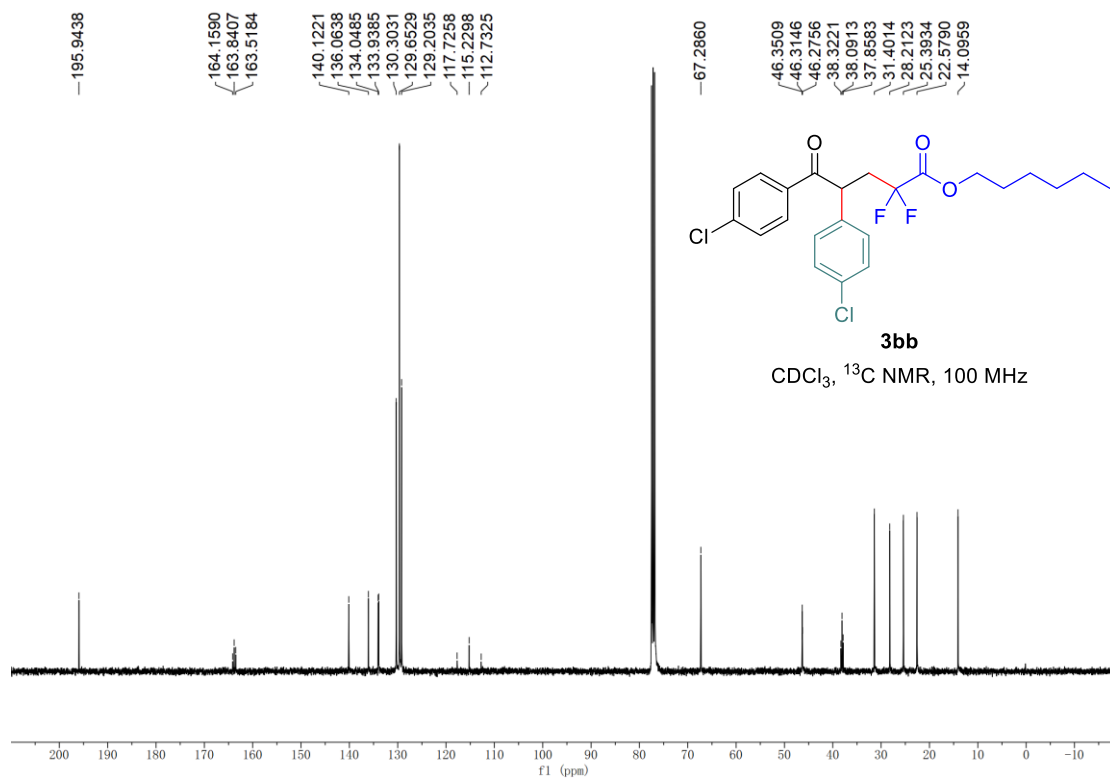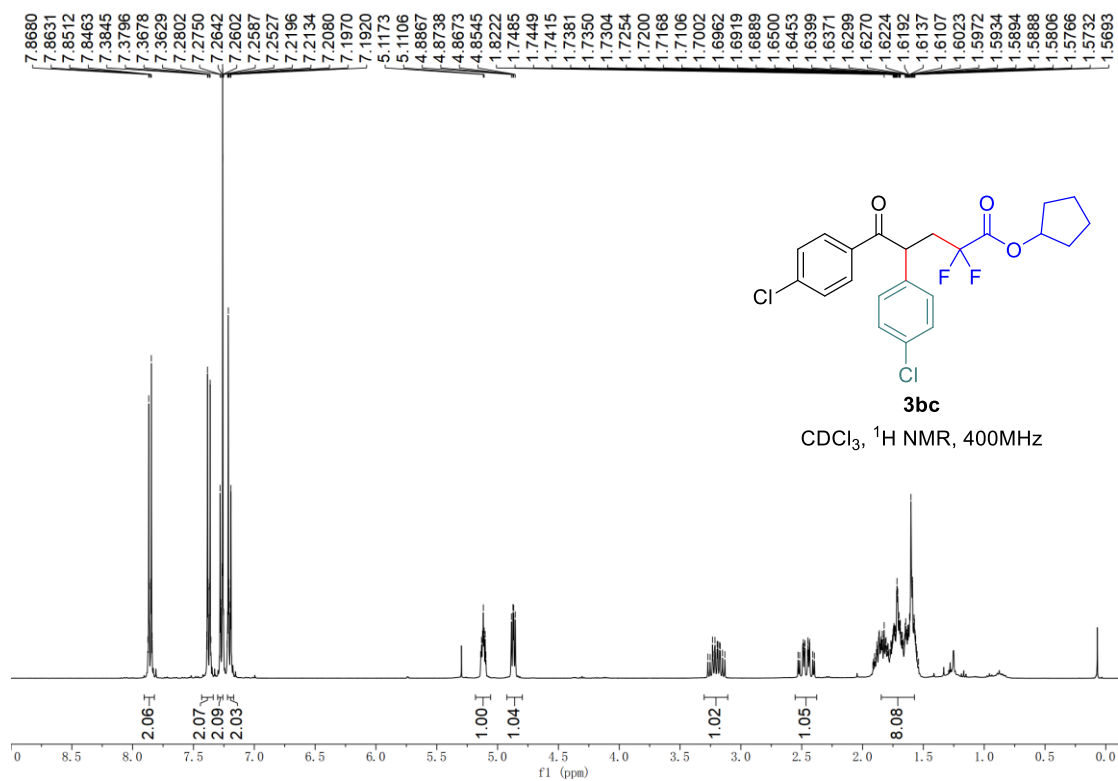

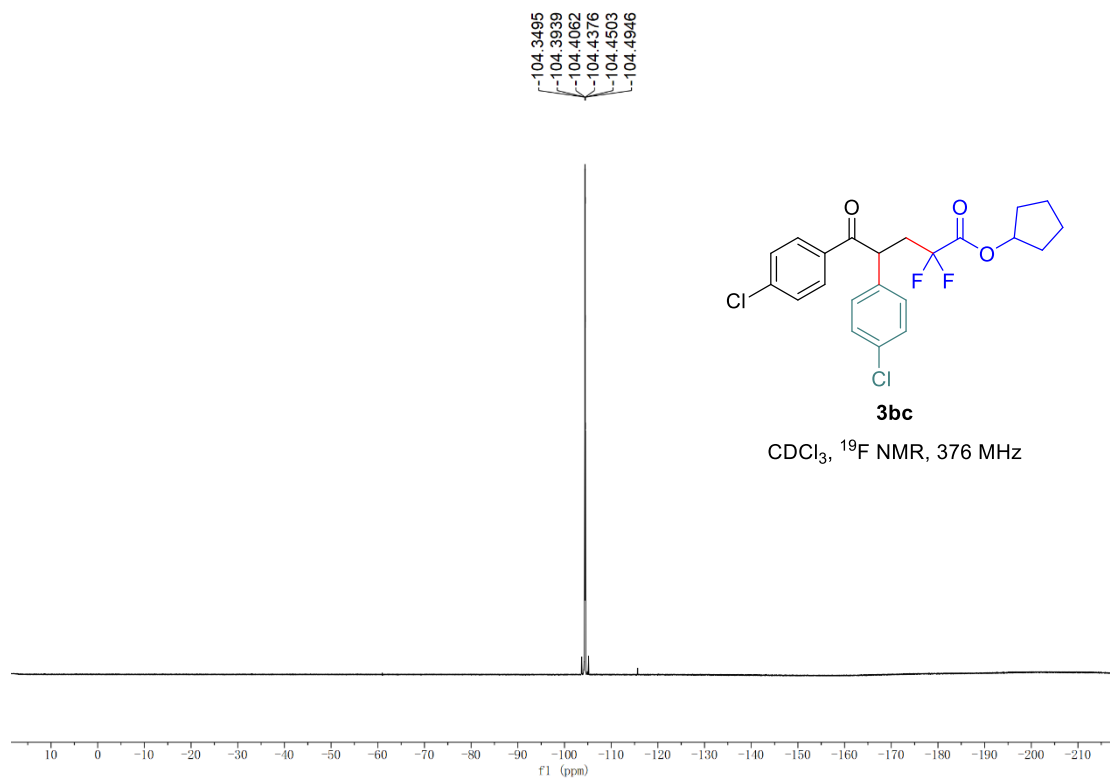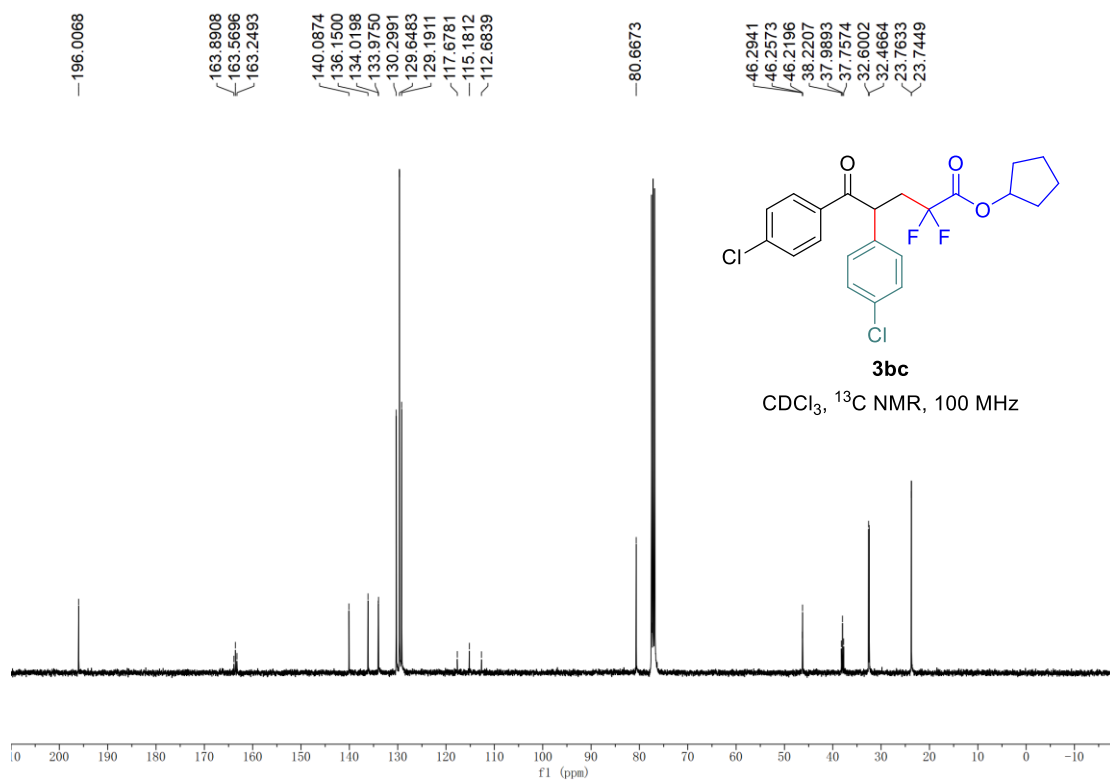

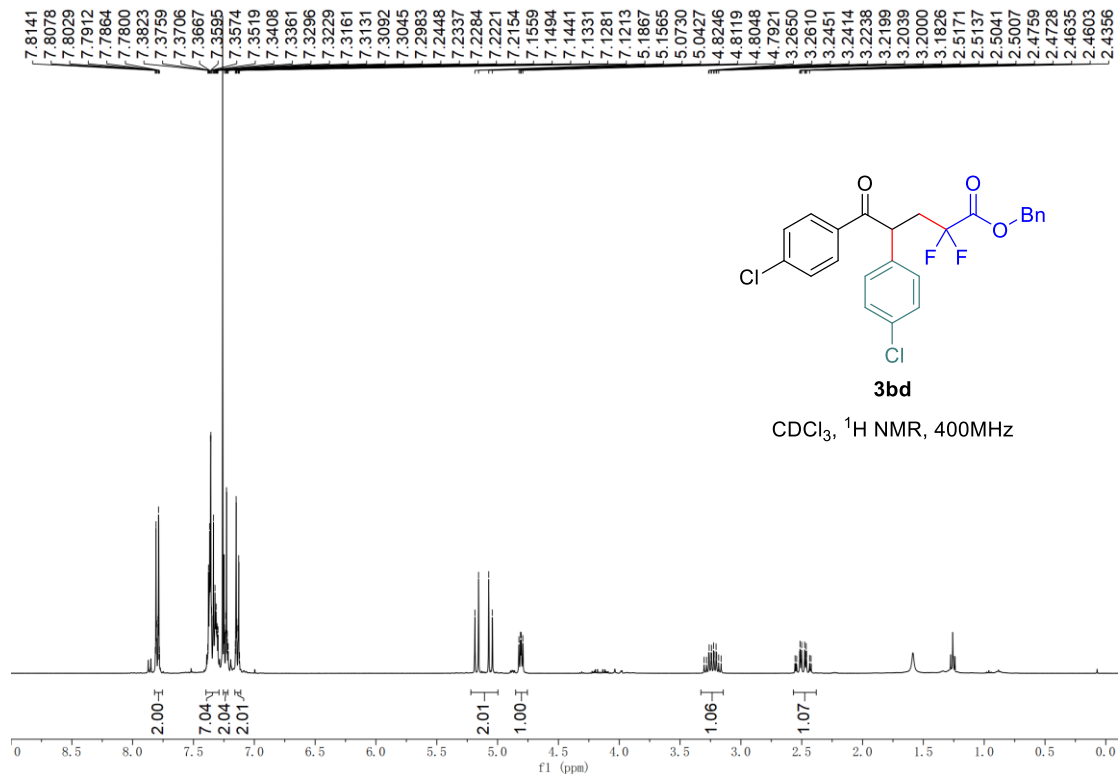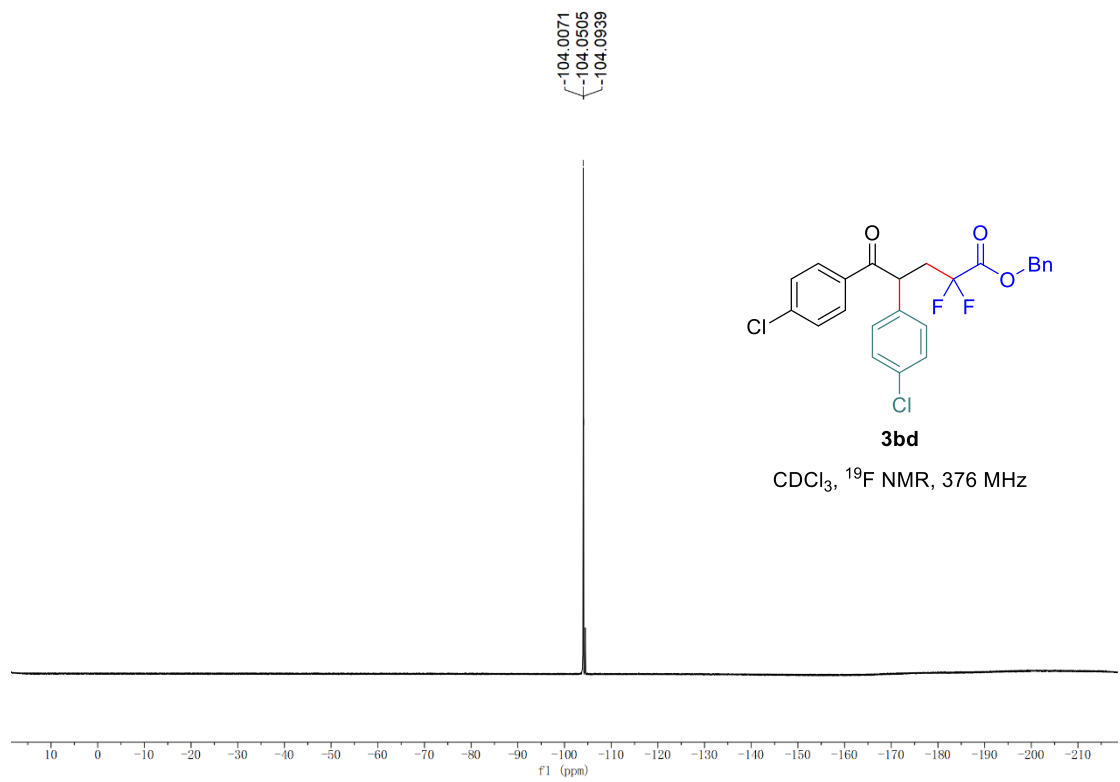

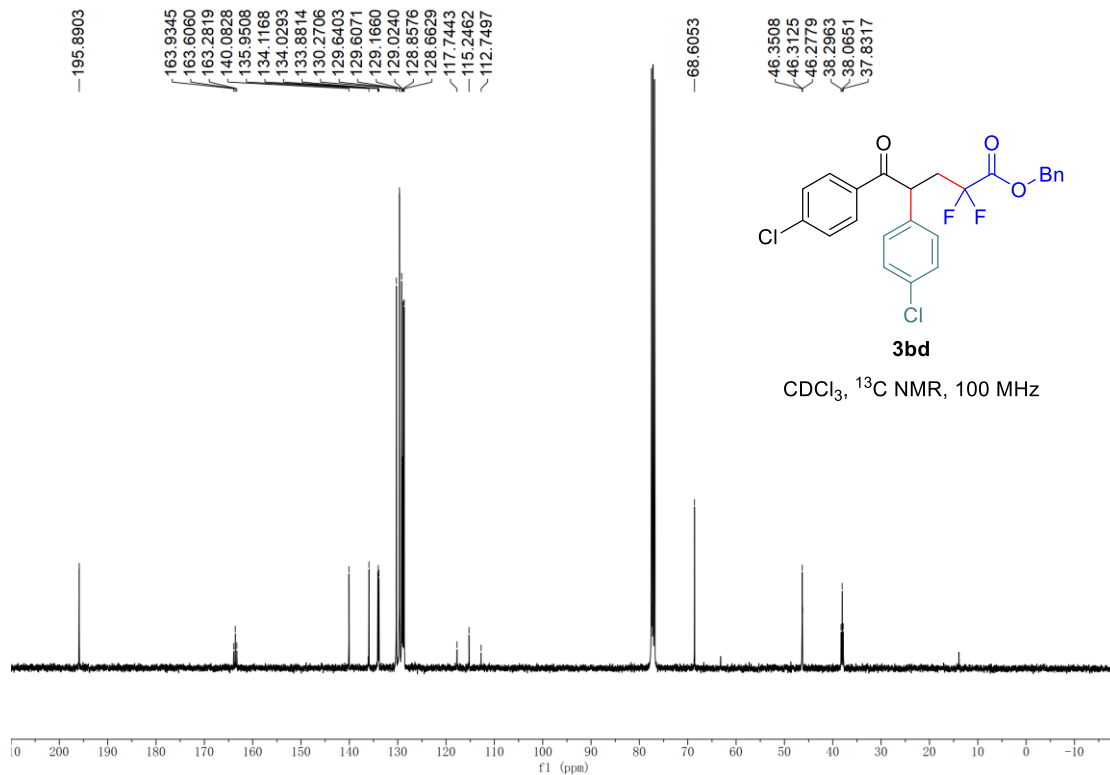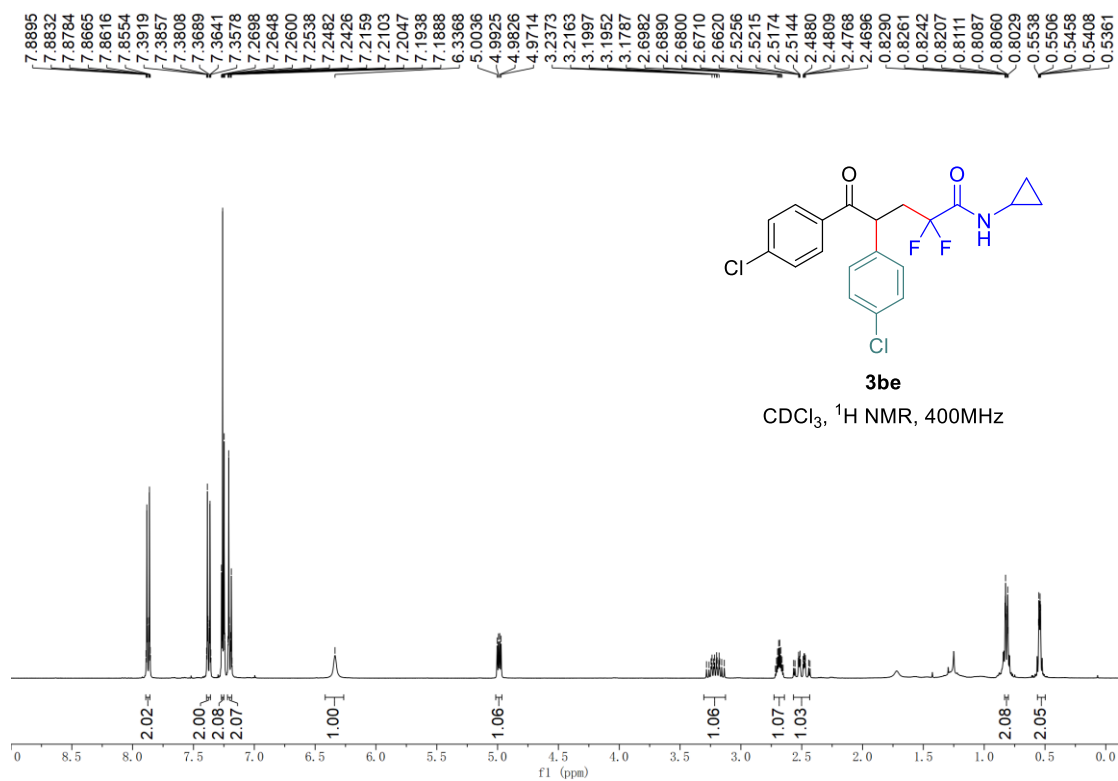



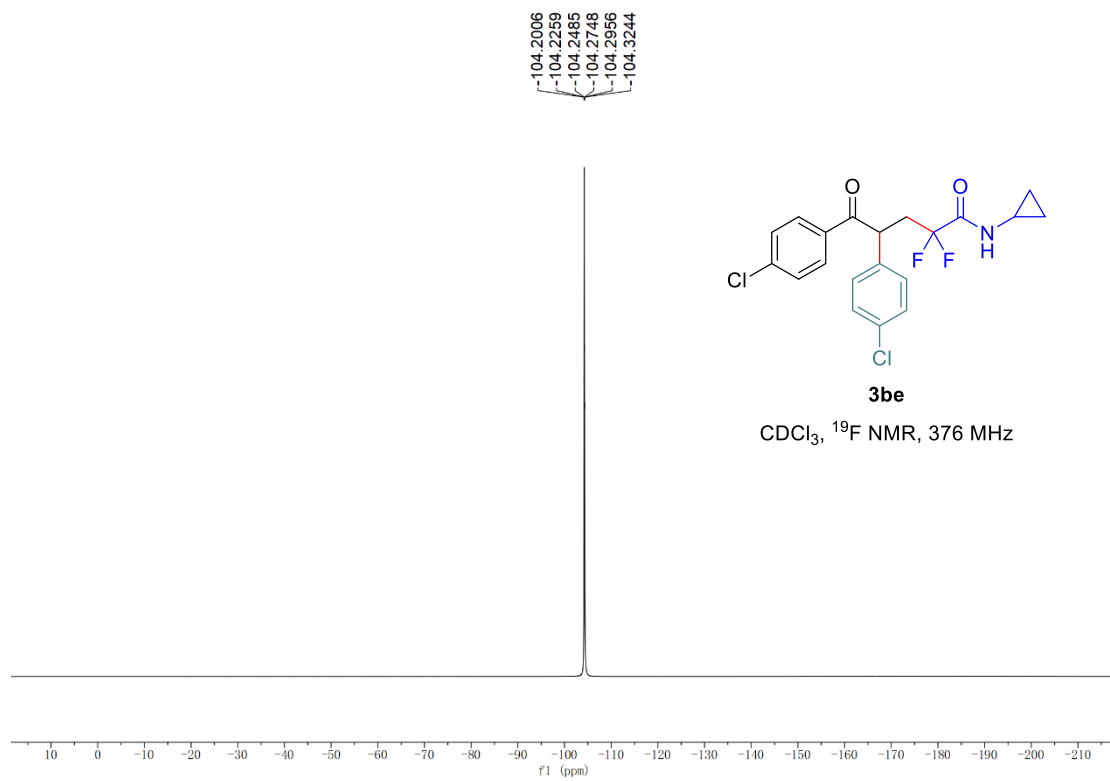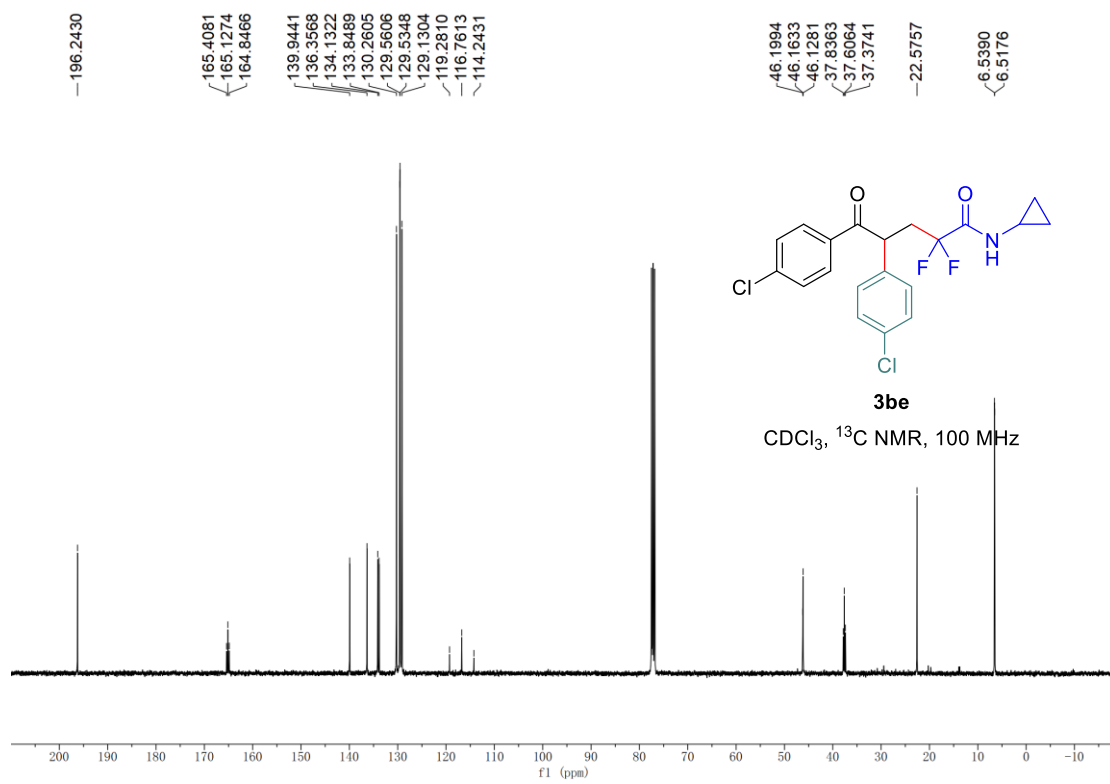

7.9123  
7.8880  
7.8716  
7.8667  
7.5859  
7.5667  
7.4688  
7.3824  
7.3729  
7.3610  
7.3539  
7.3342  
7.2682  
7.2606  
7.2465  
7.2345  
7.2121  
7.1924  
7.1741

5.0321  
5.0196  
5.0114  
4.9994  
3.3890  
3.3683  
3.3512  
3.3460  
3.3311  
3.3258  
3.3085  
3.3027  
3.2860  
3.2819  
3.2645  
3.2445  
2.7148  
2.7026  
2.6770  
2.6706  
2.6641  
2.6587  
2.6335  
2.6281  
2.6210  
2.6159  
2.5905  
2.5783

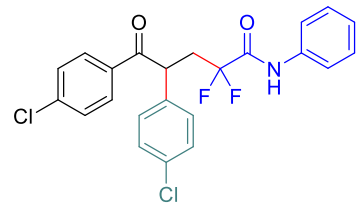

CDCl<sub>3</sub>, <sup>1</sup>H NMR, 400MHz

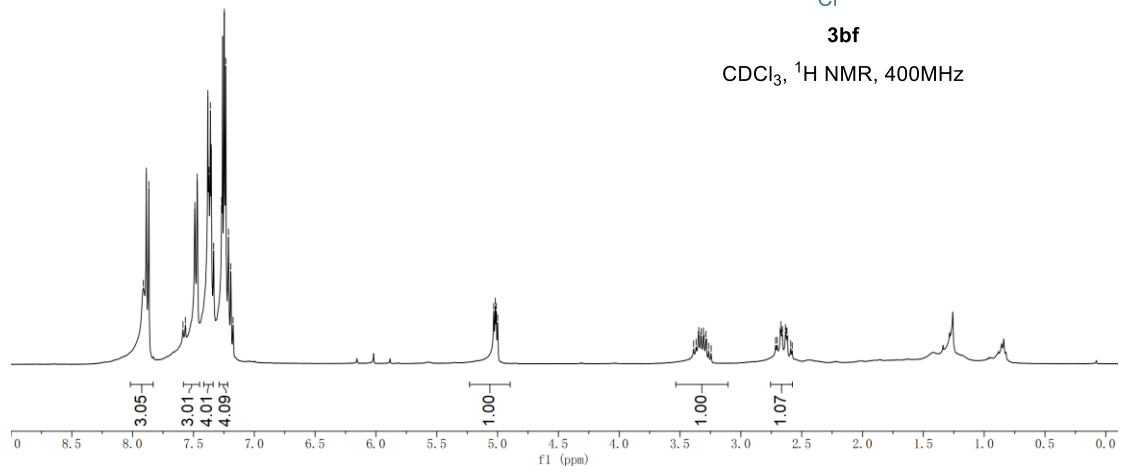

-103.4357  
-103.4805  
-103.5273

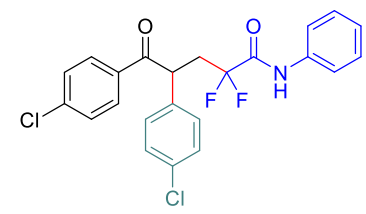

CDCl<sub>3</sub>, <sup>19</sup>F NMR, 376 MHz

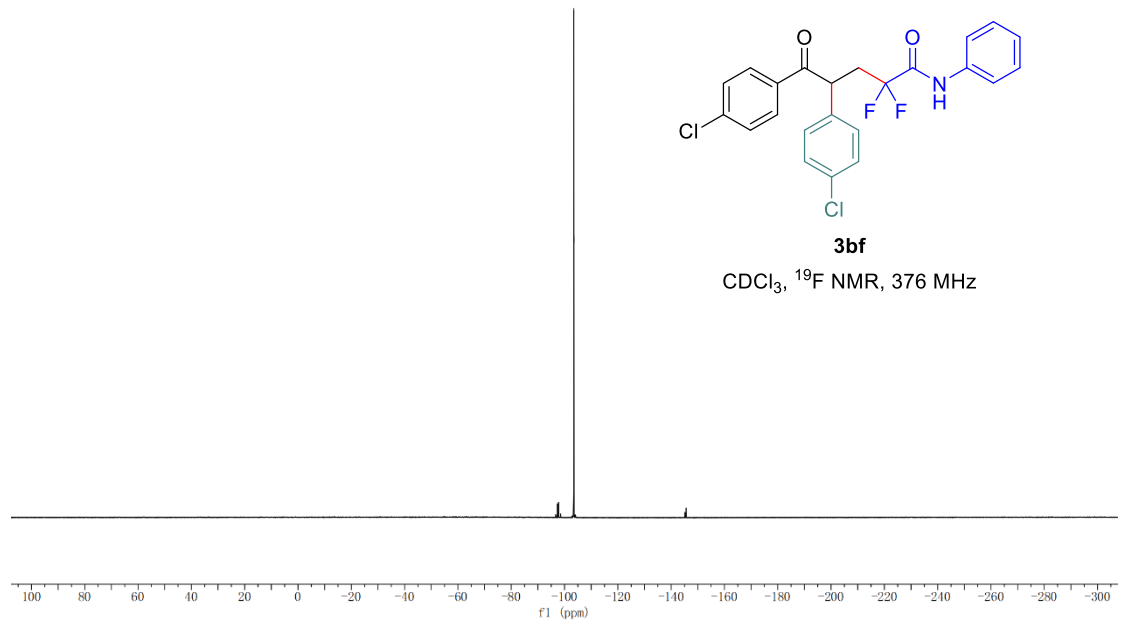

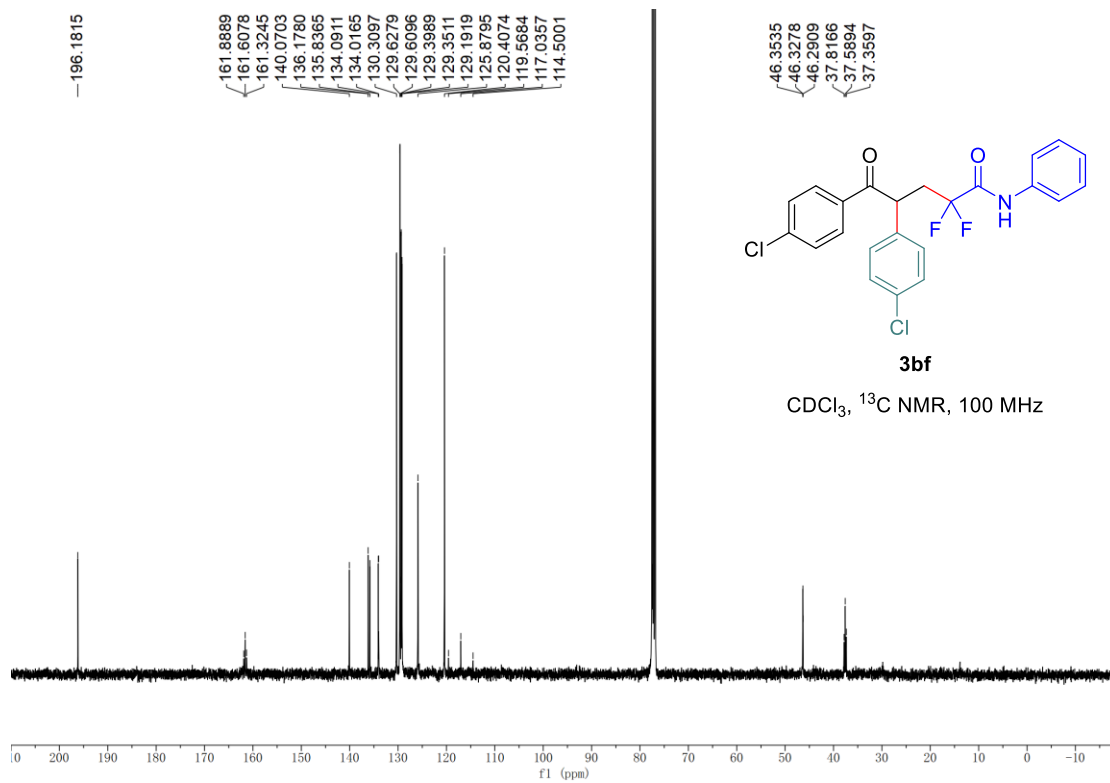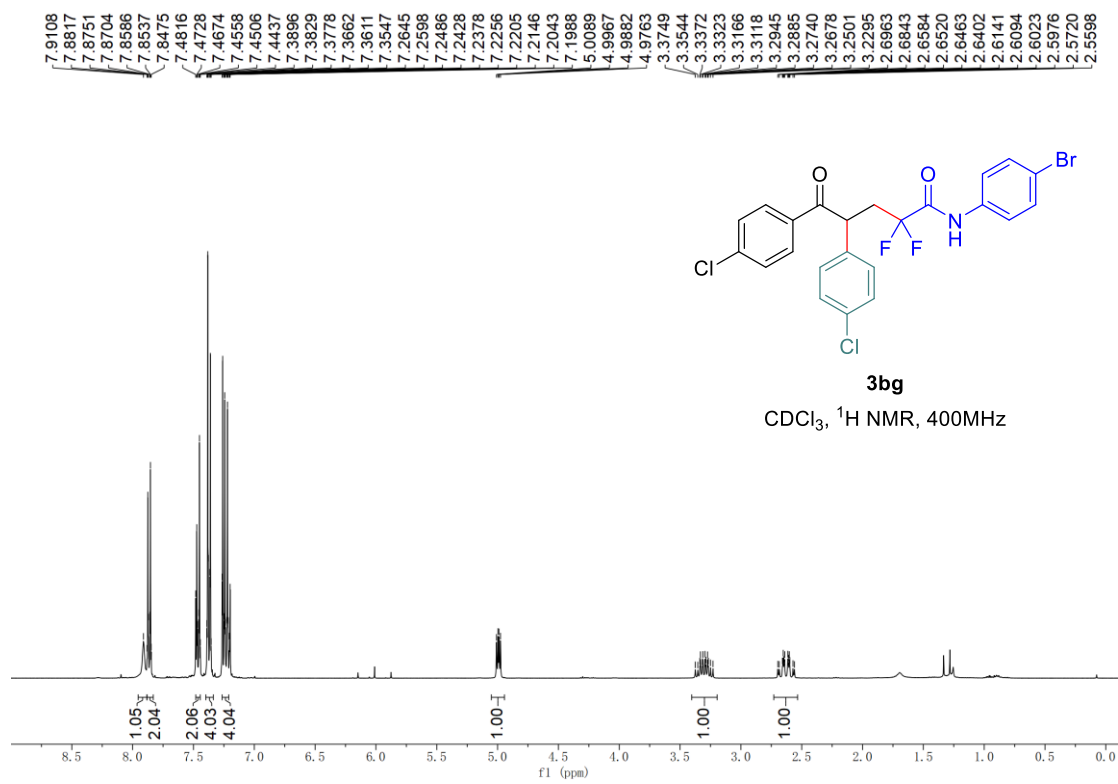

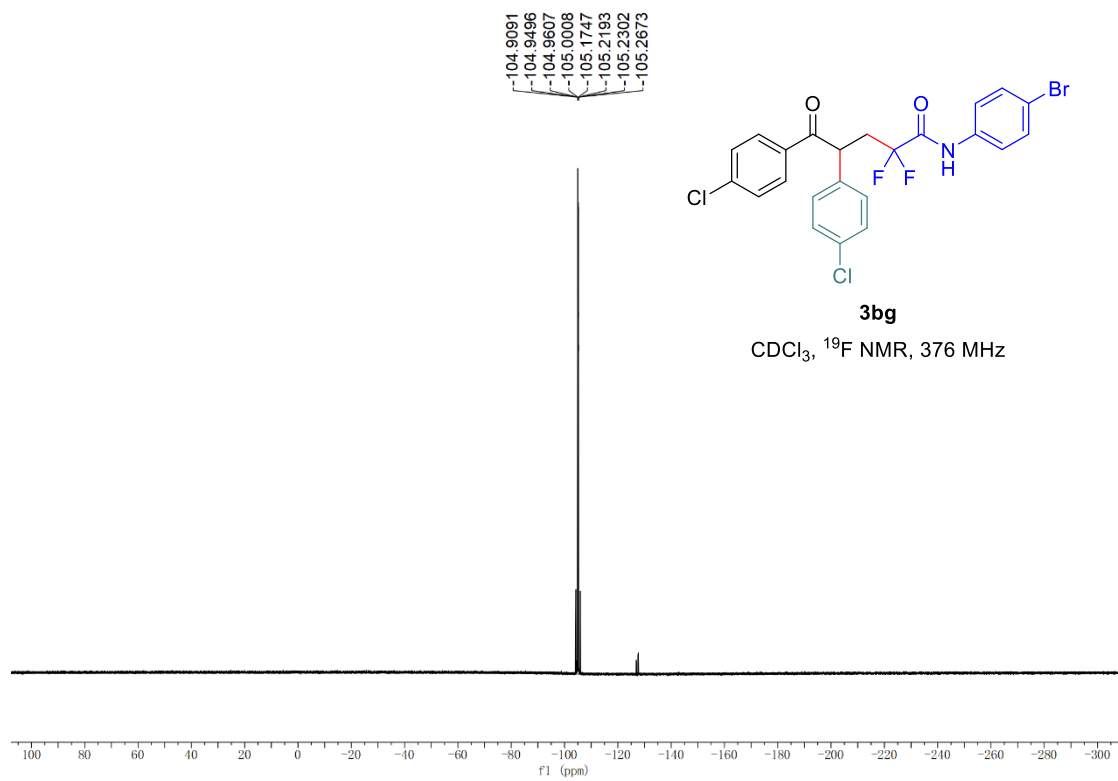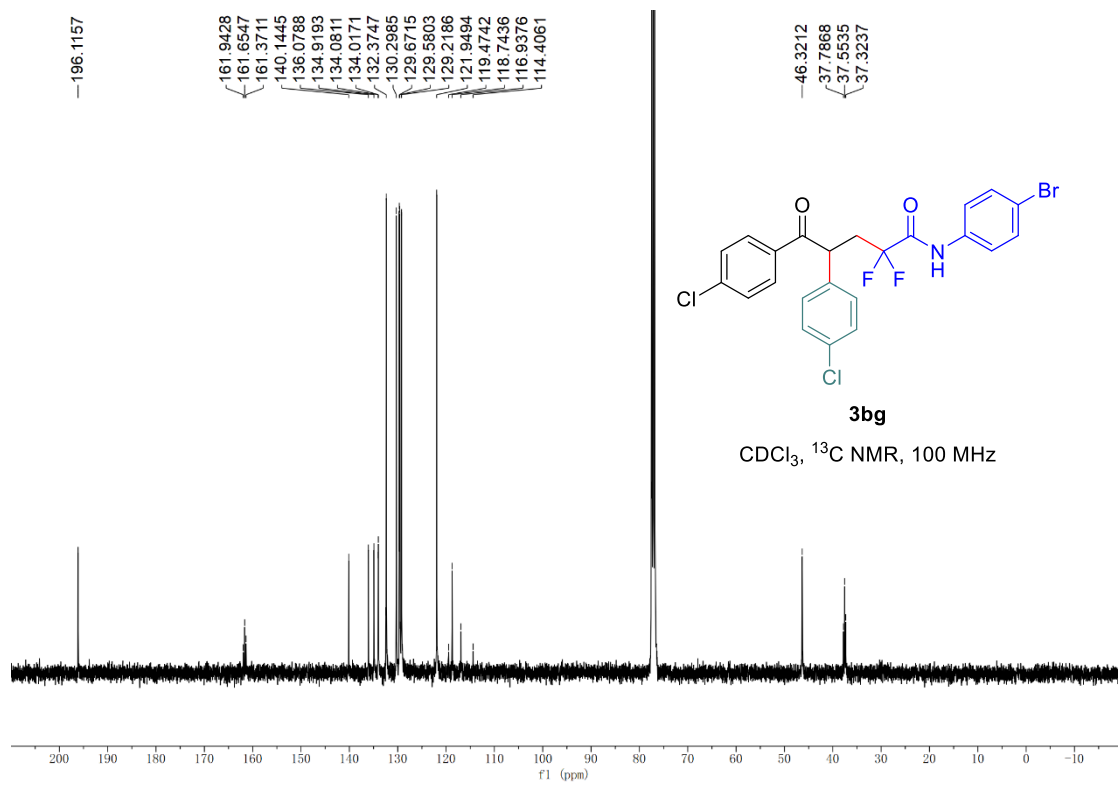

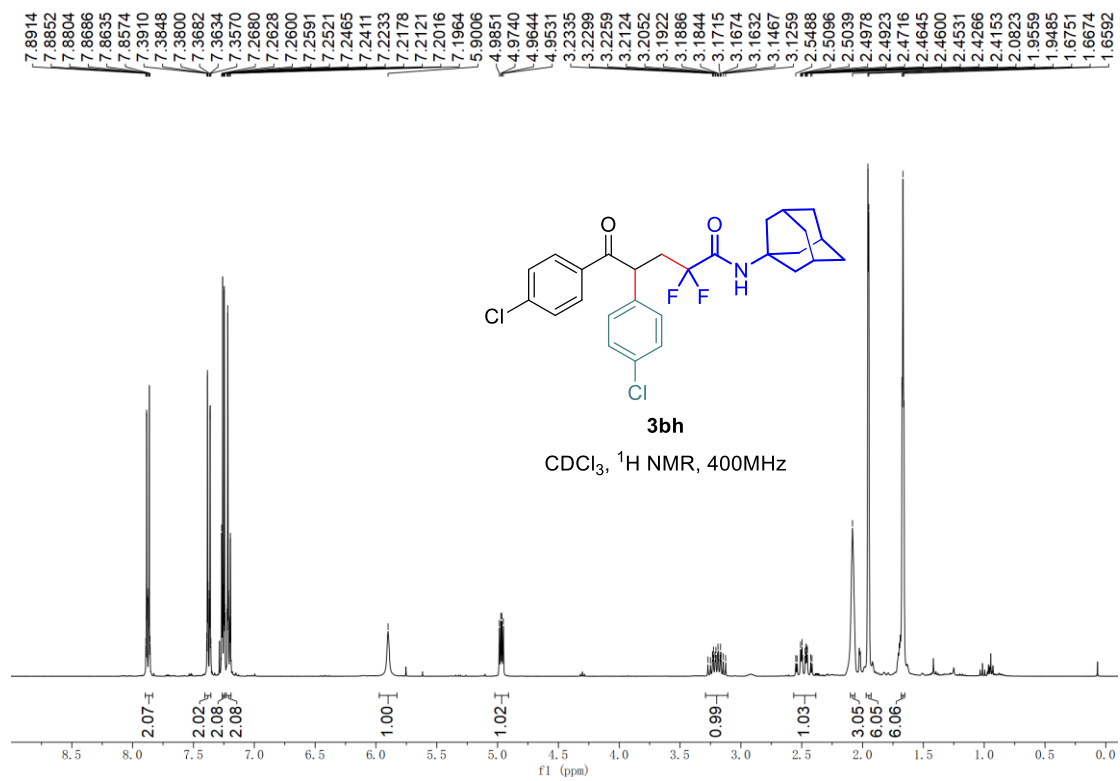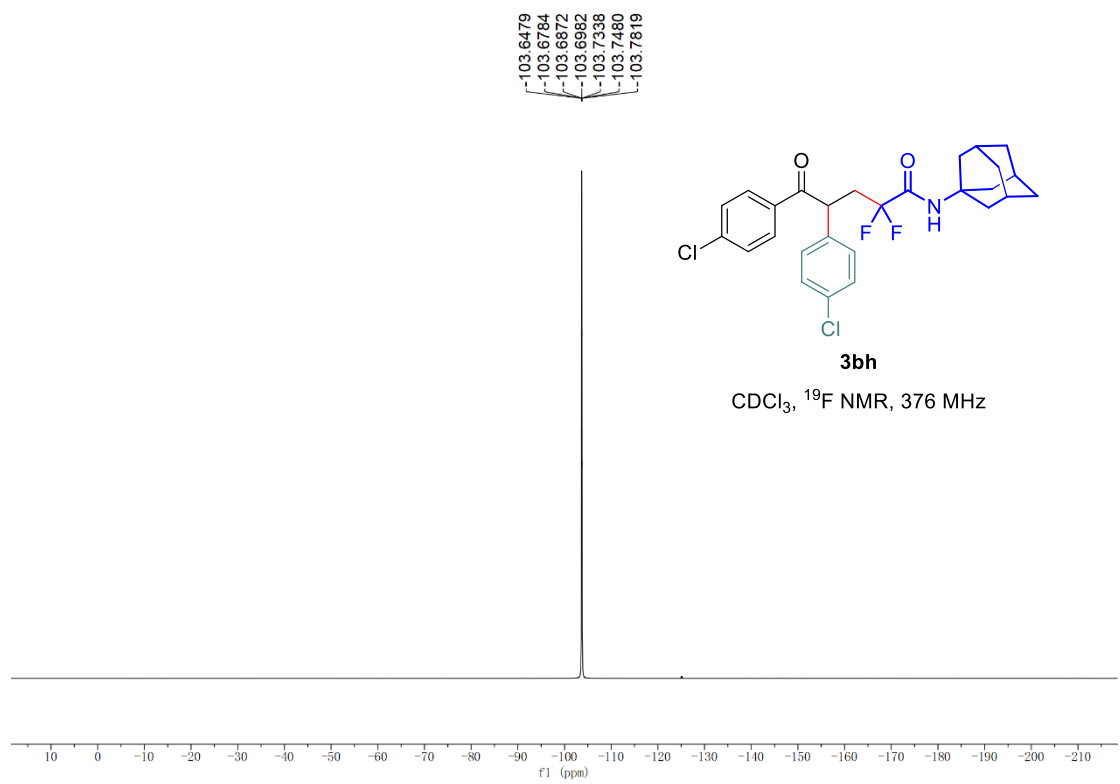

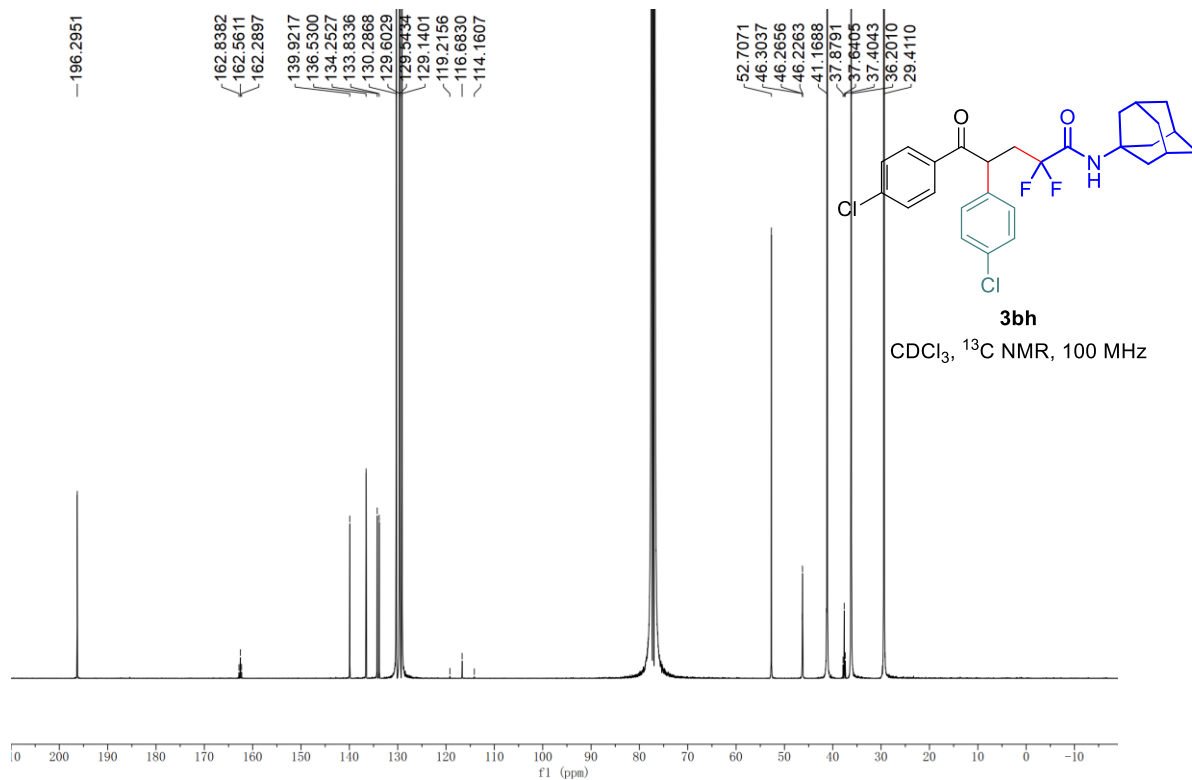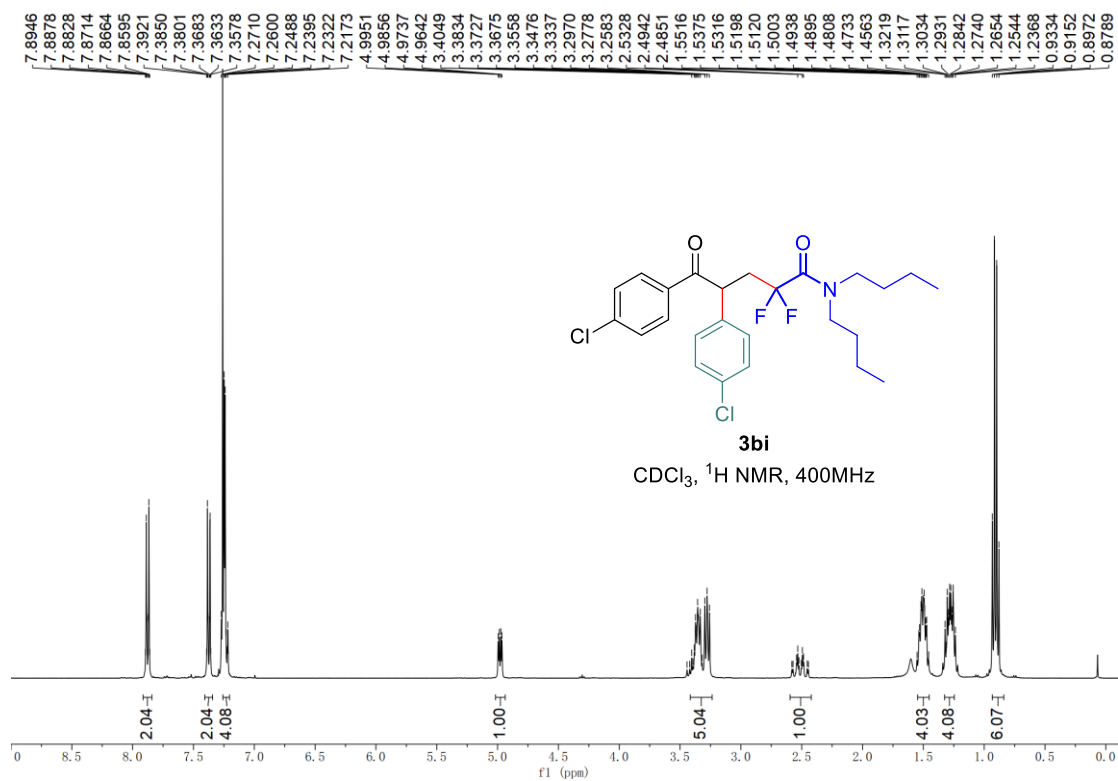

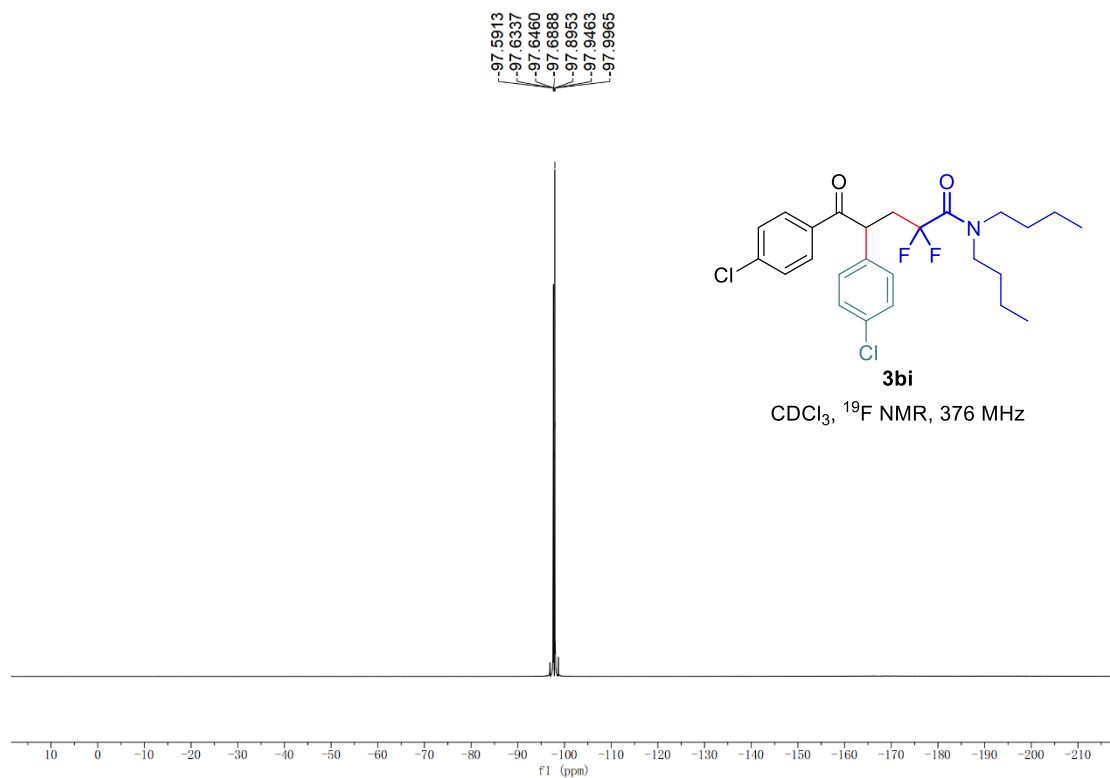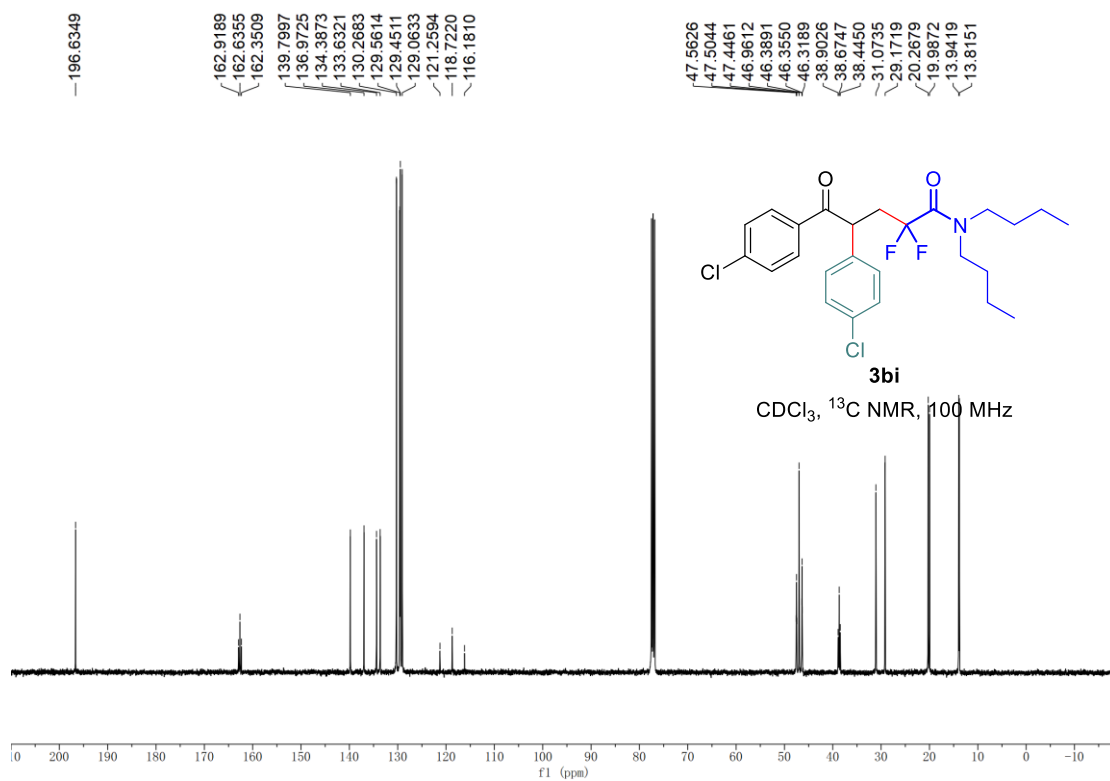

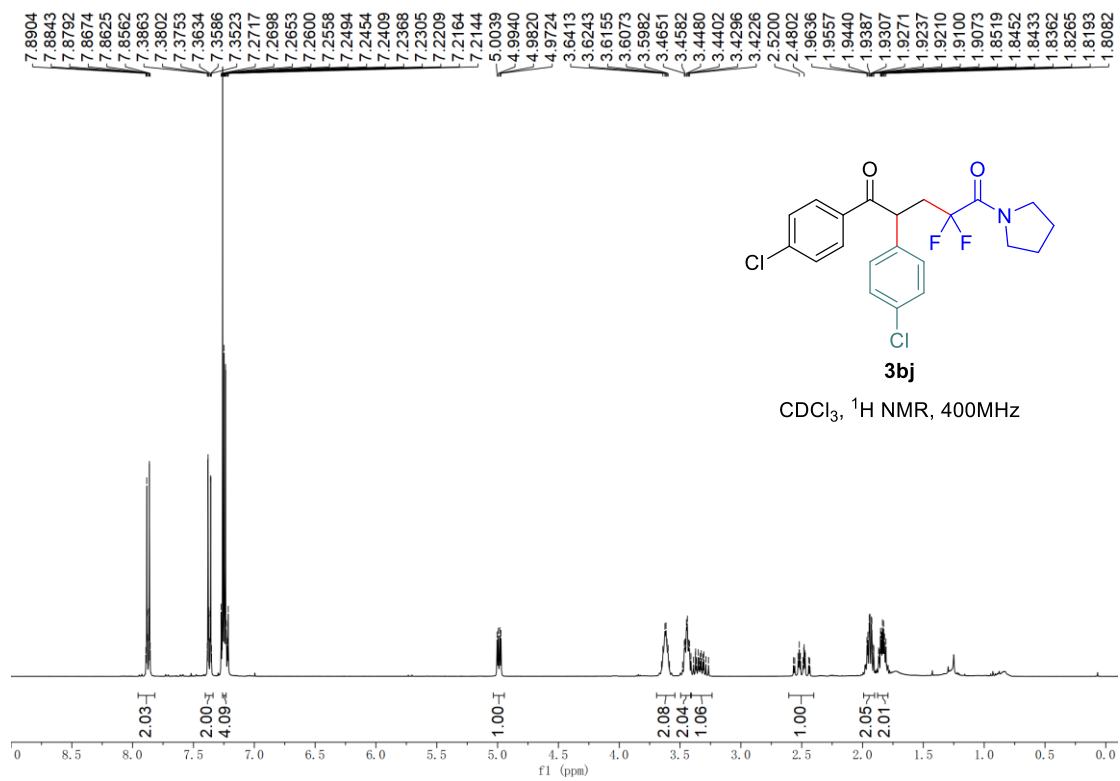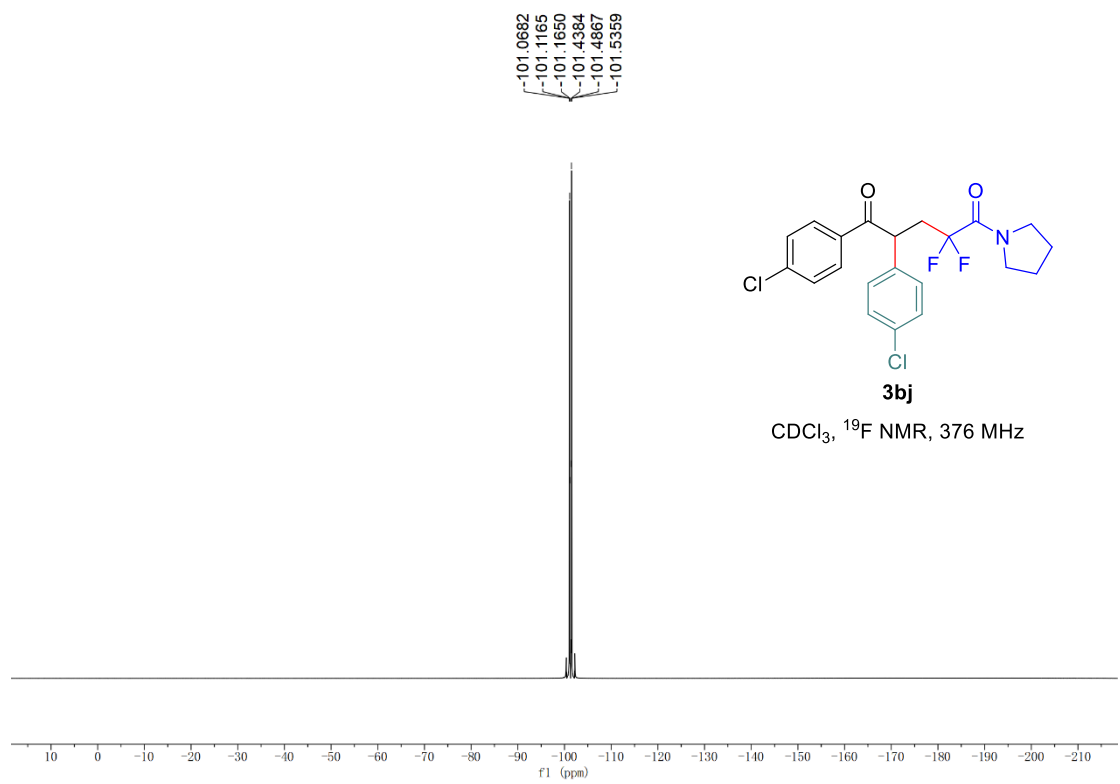



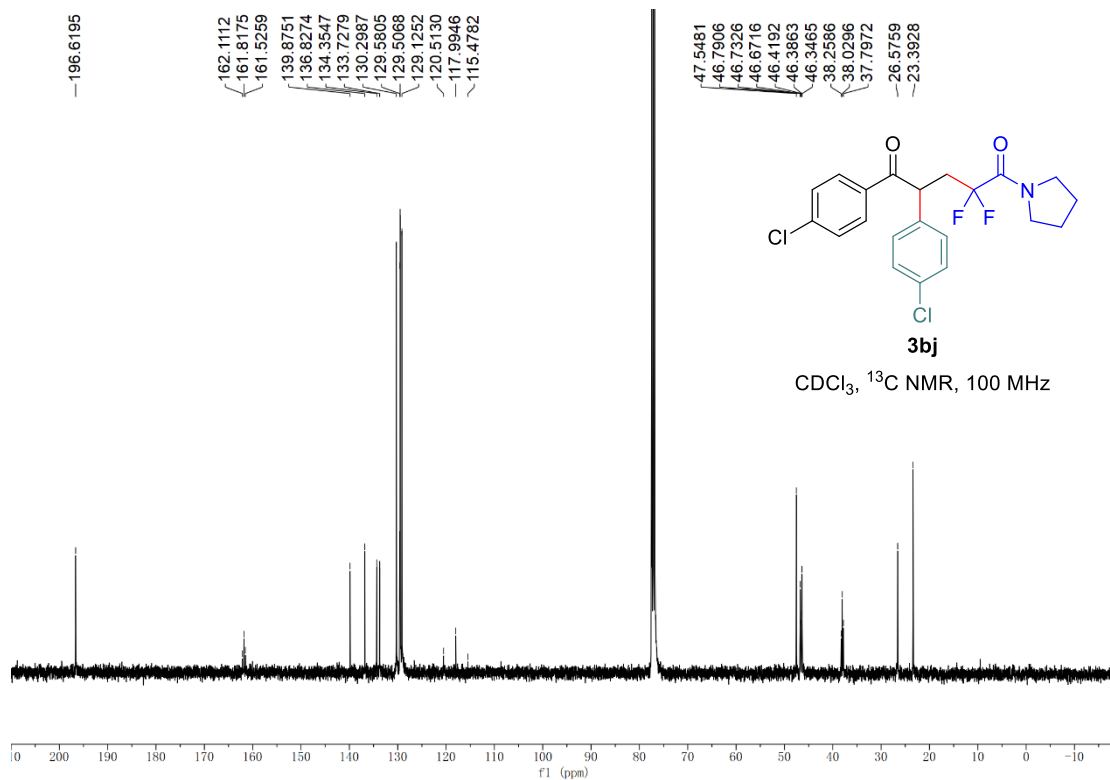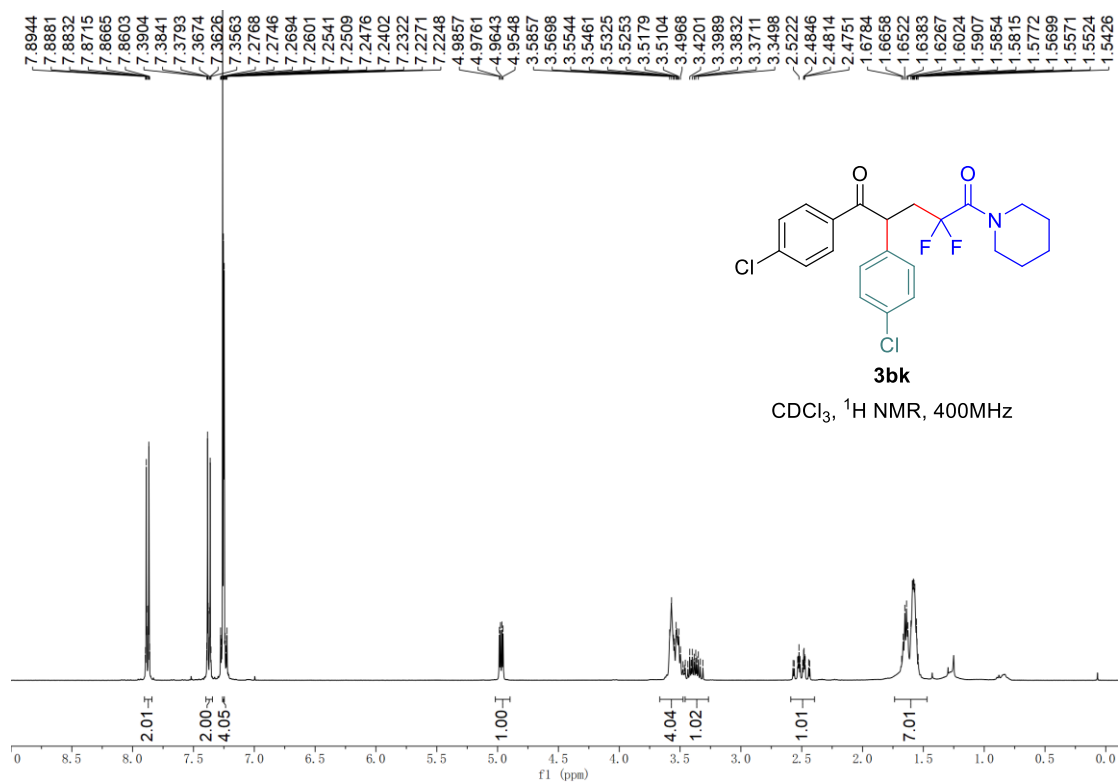

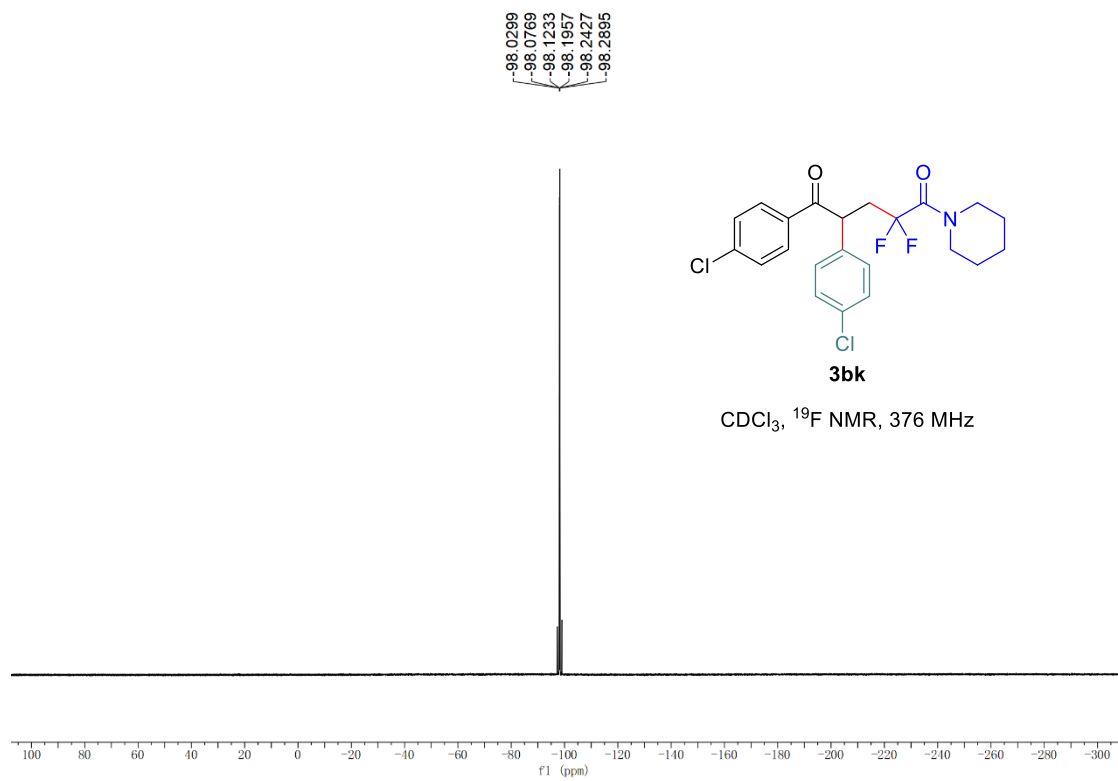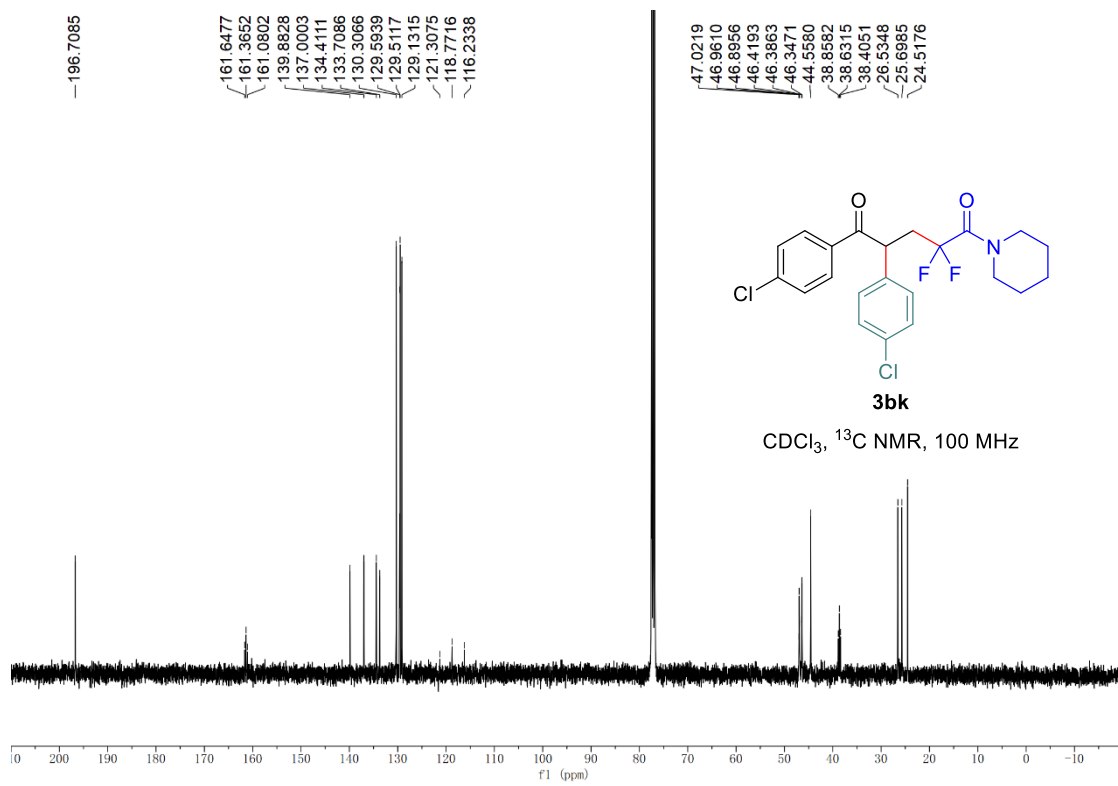

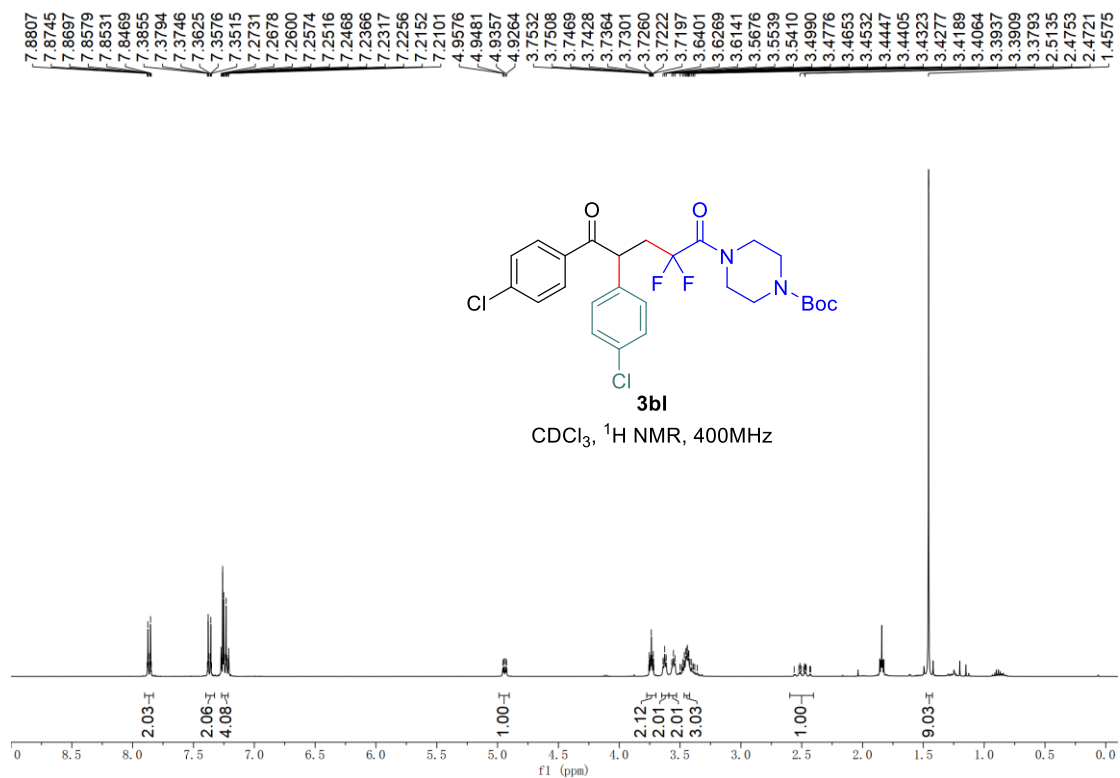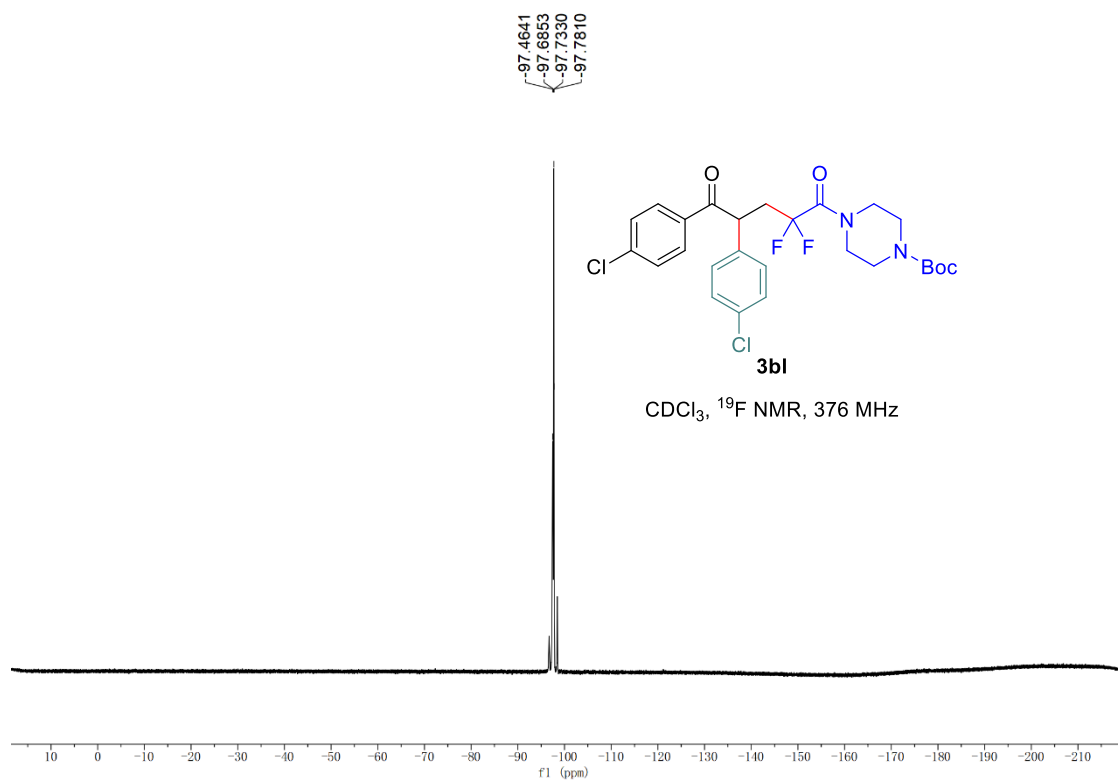

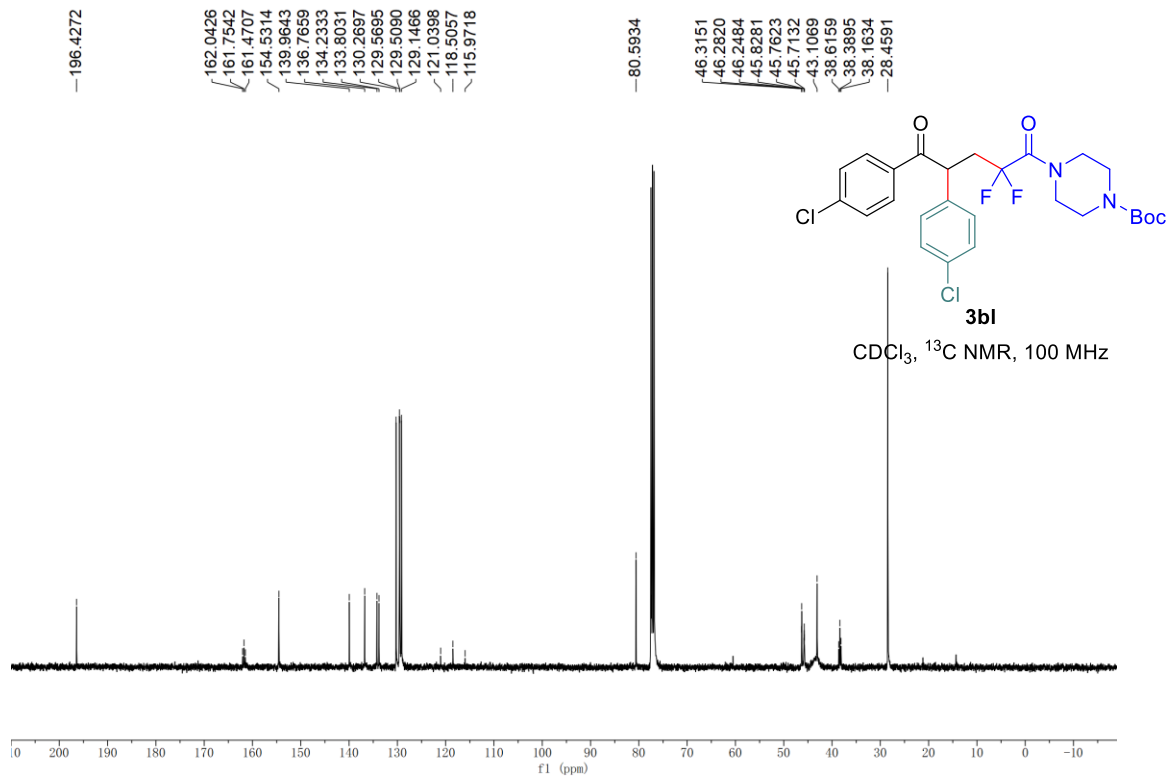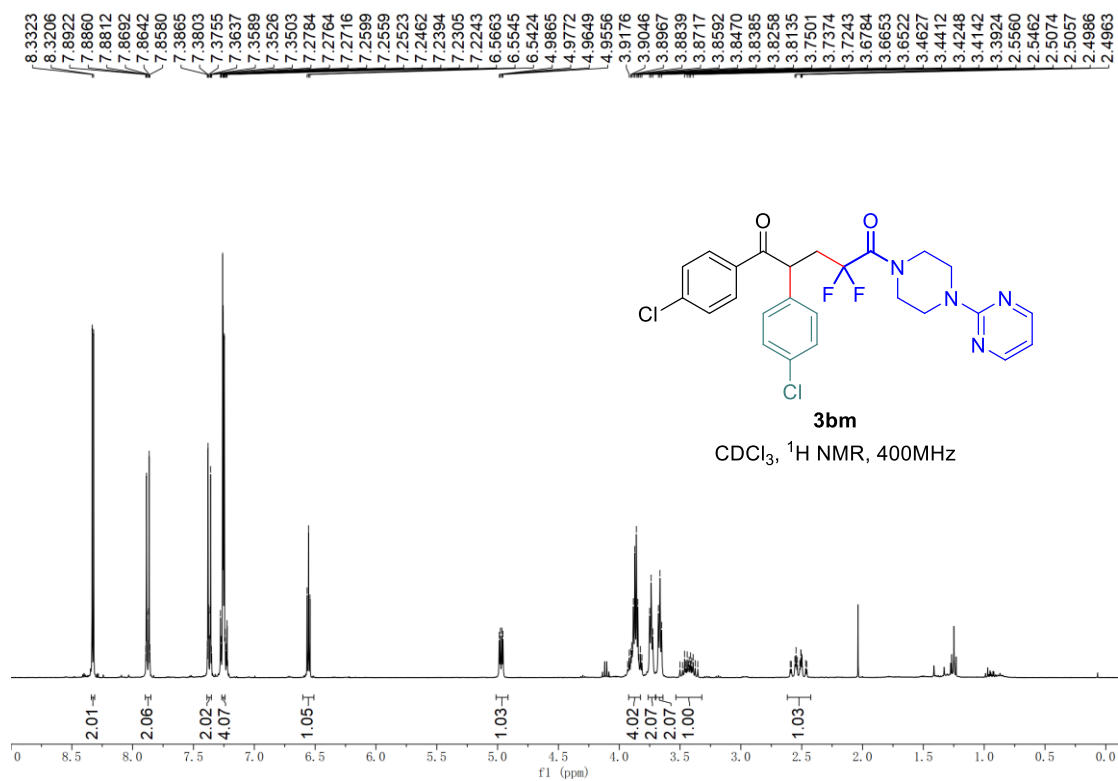

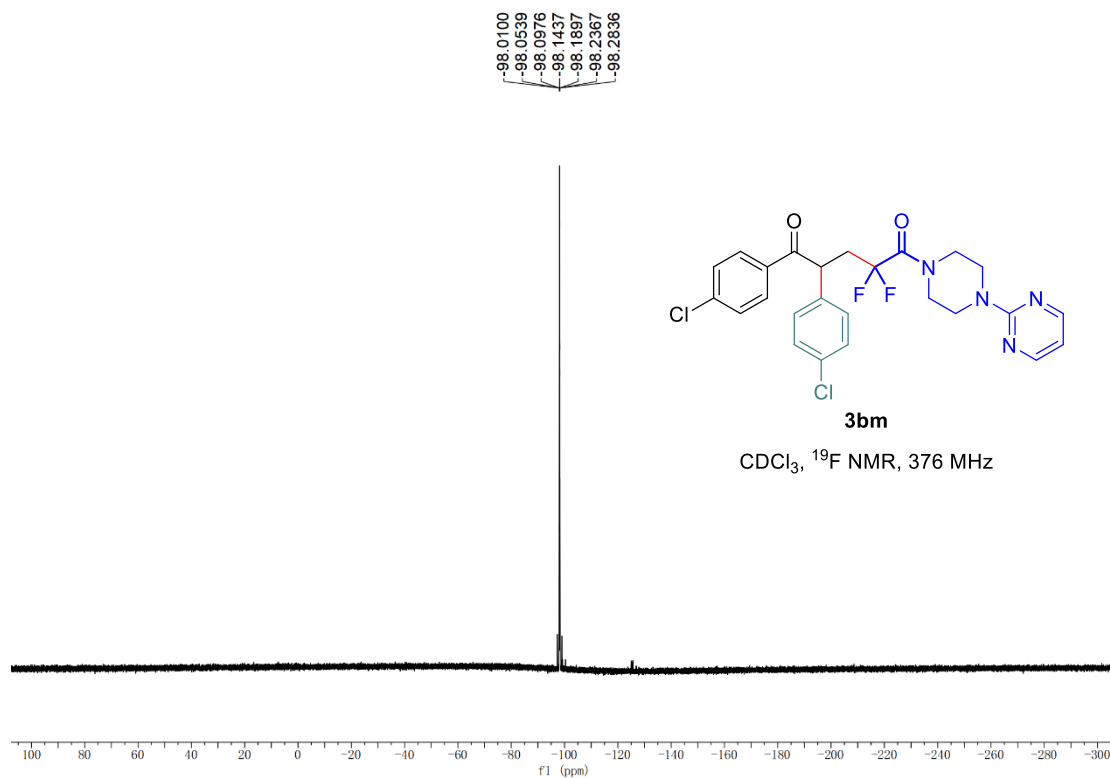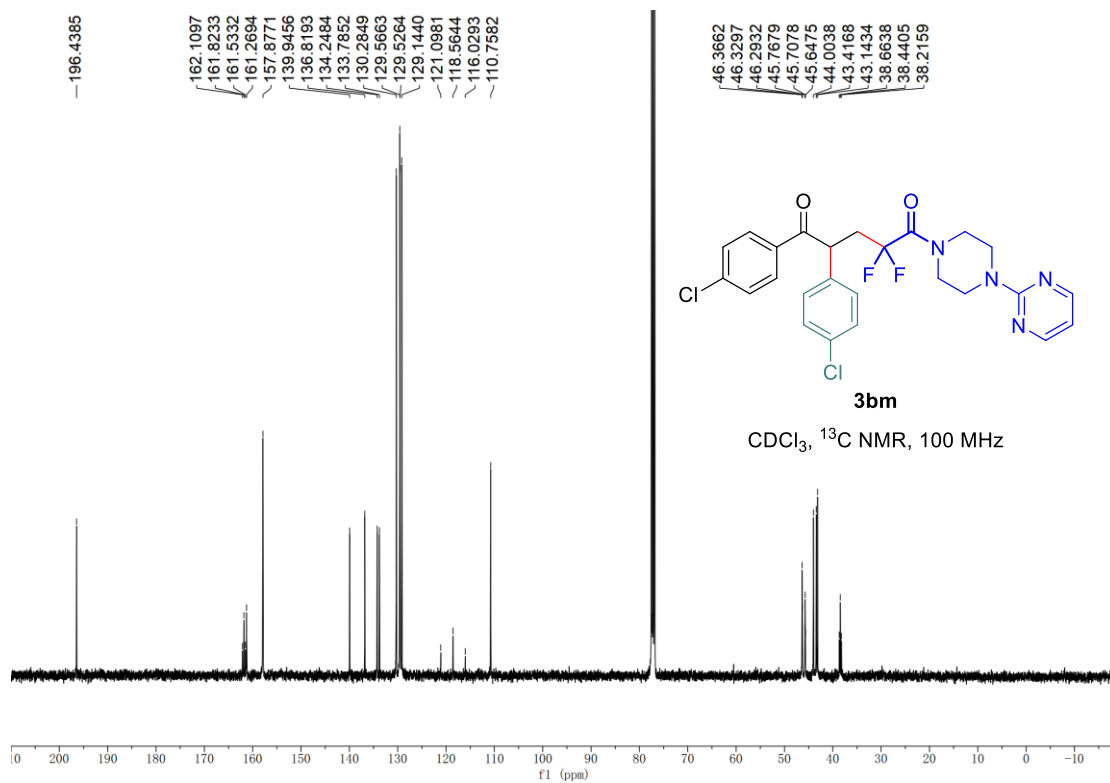

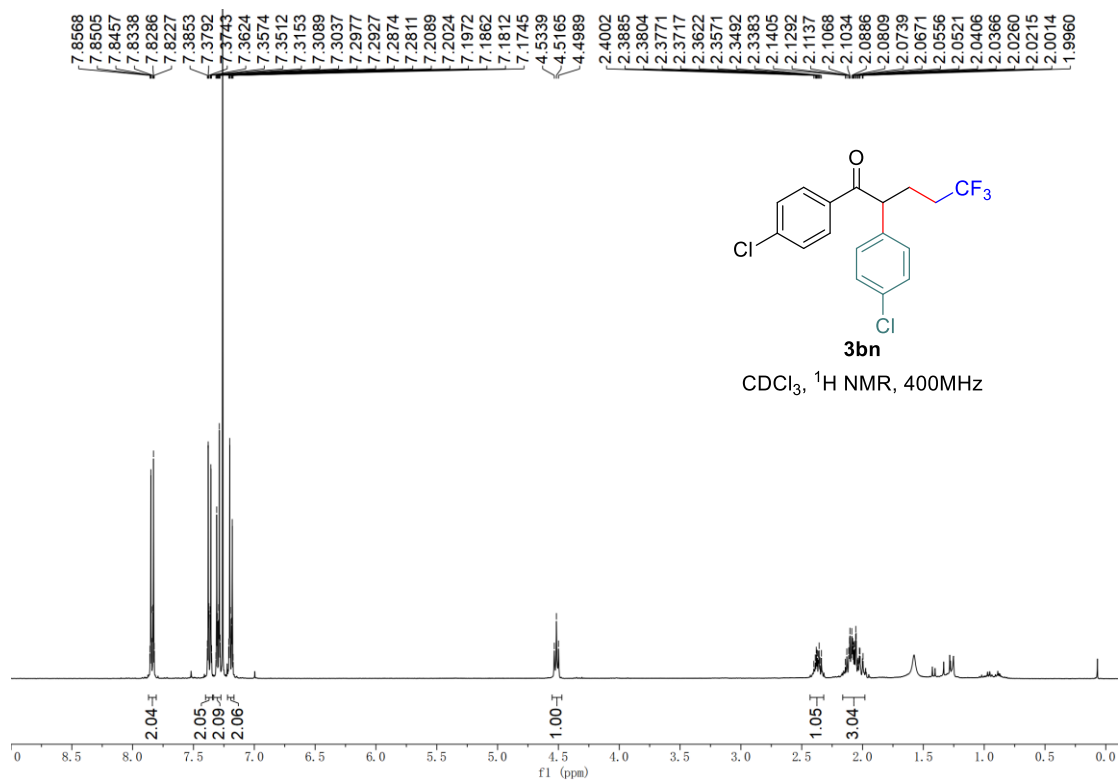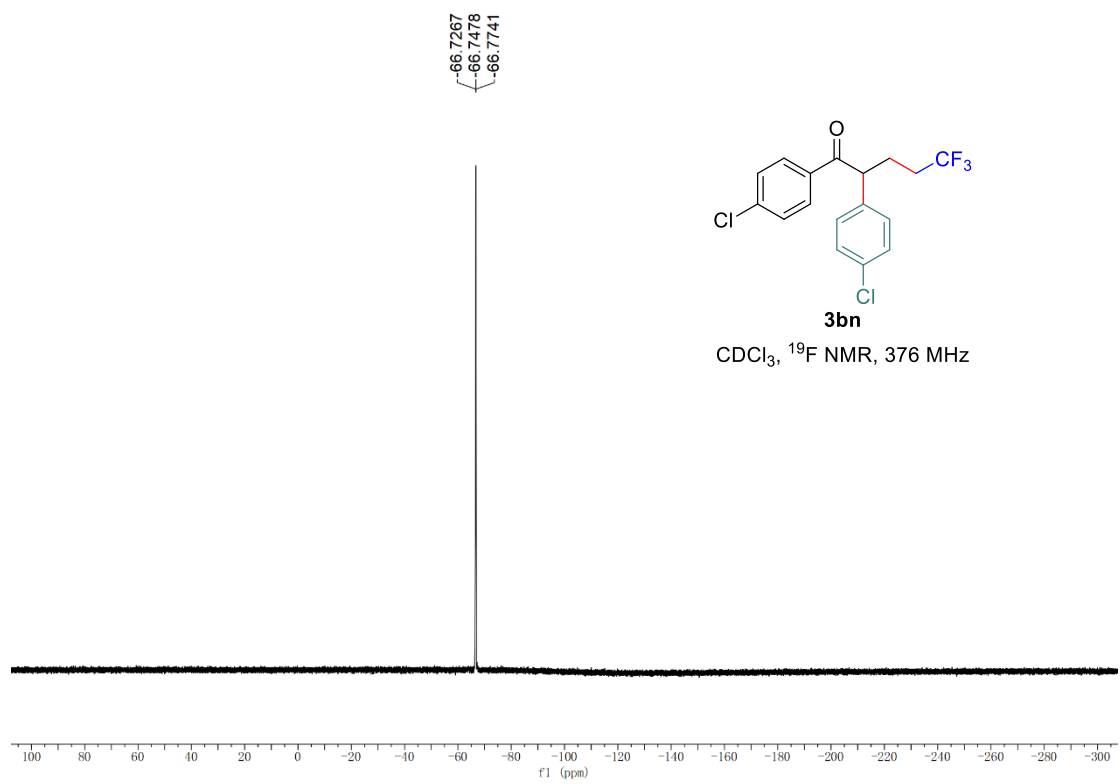

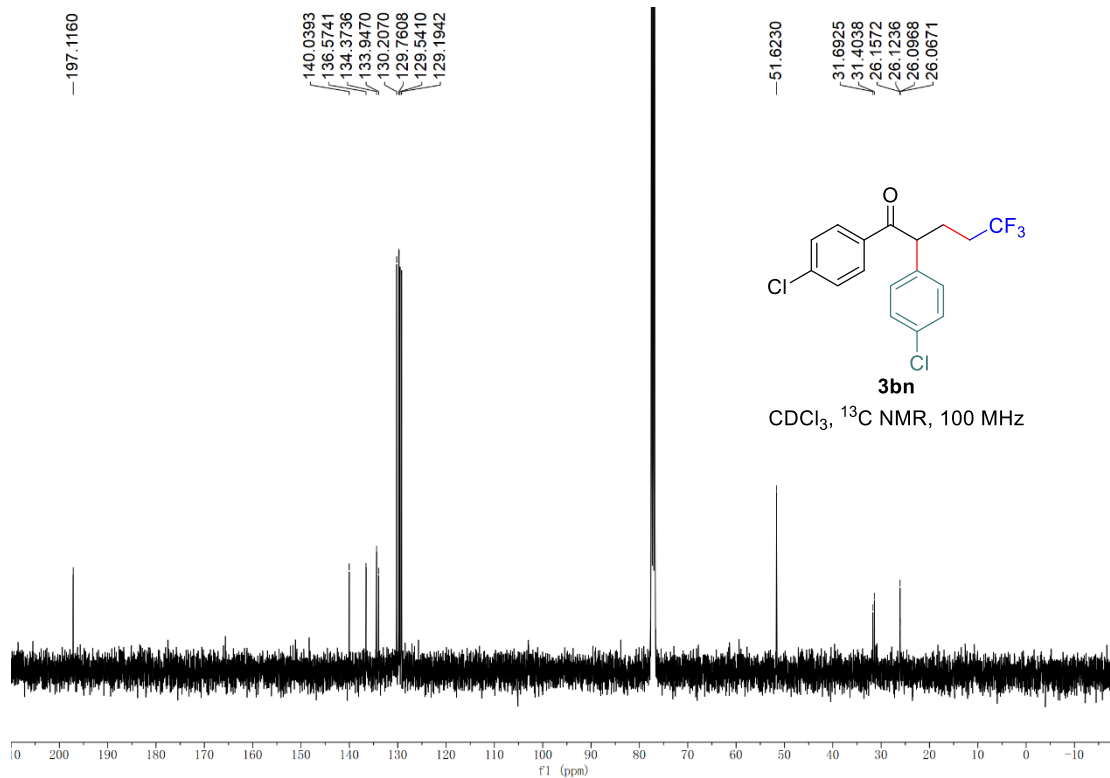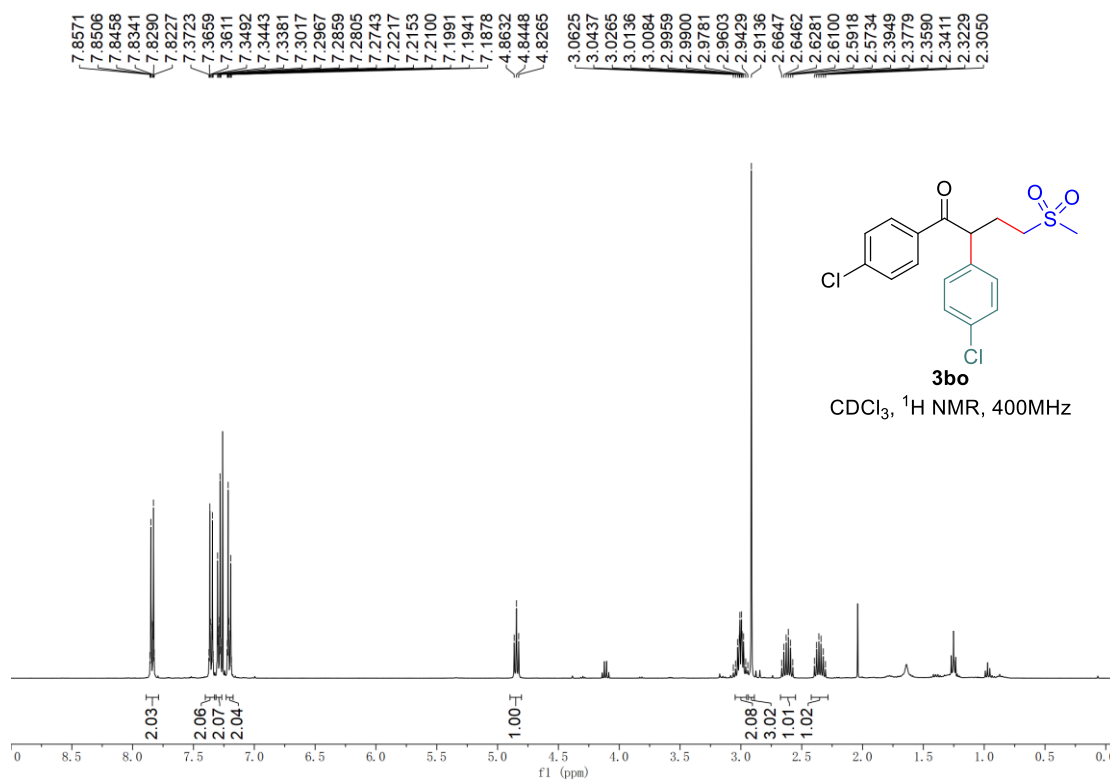

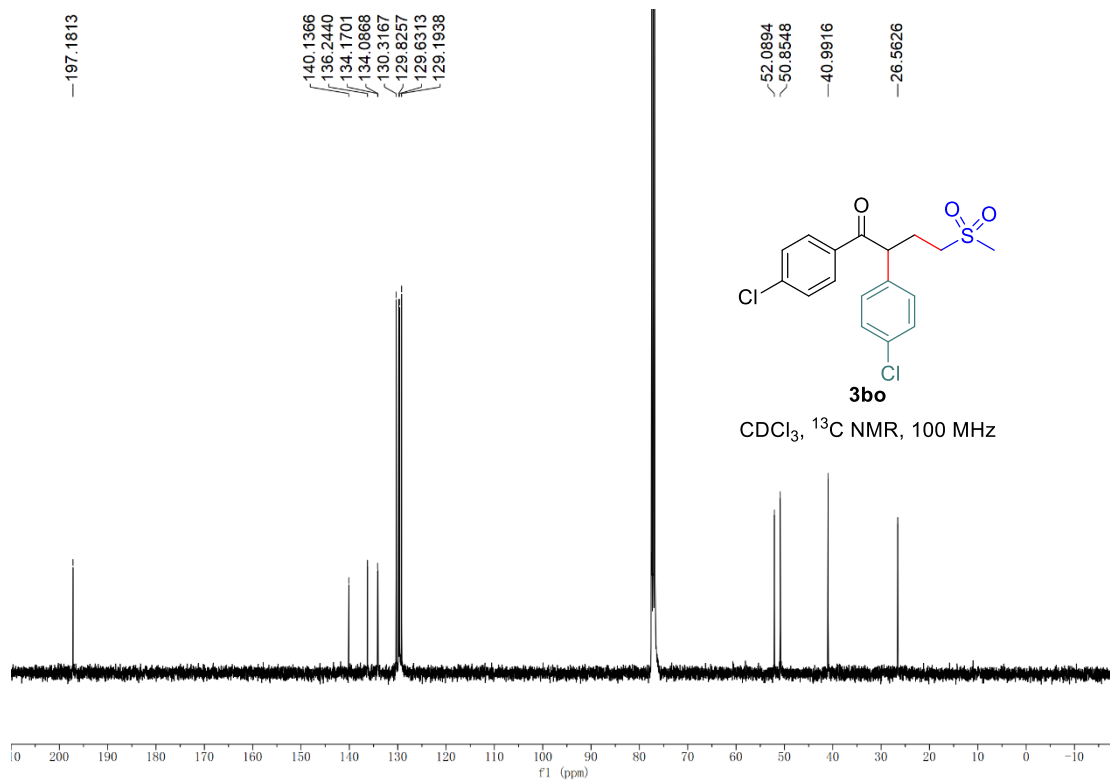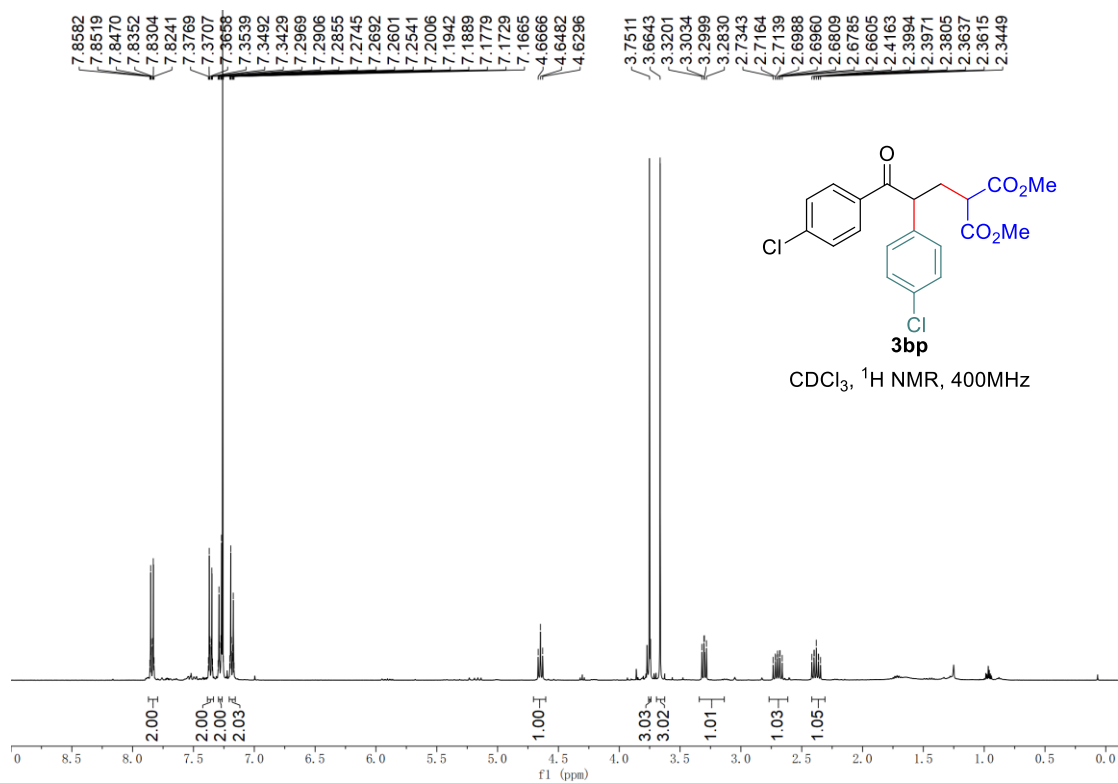



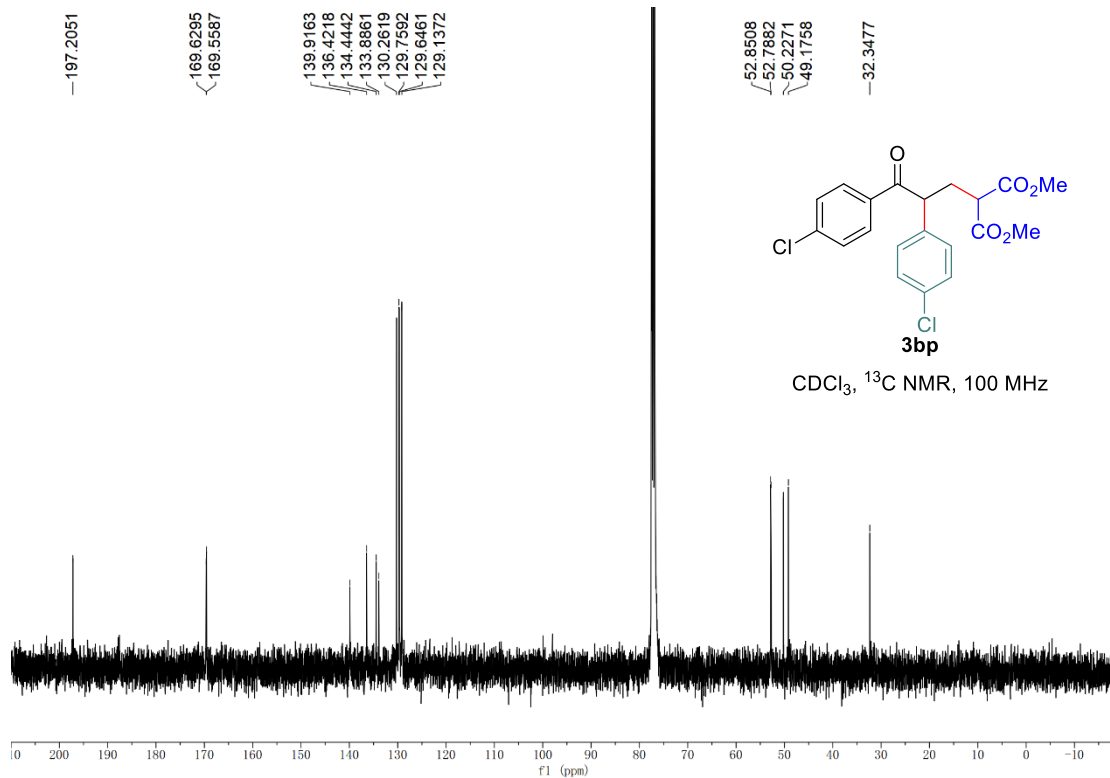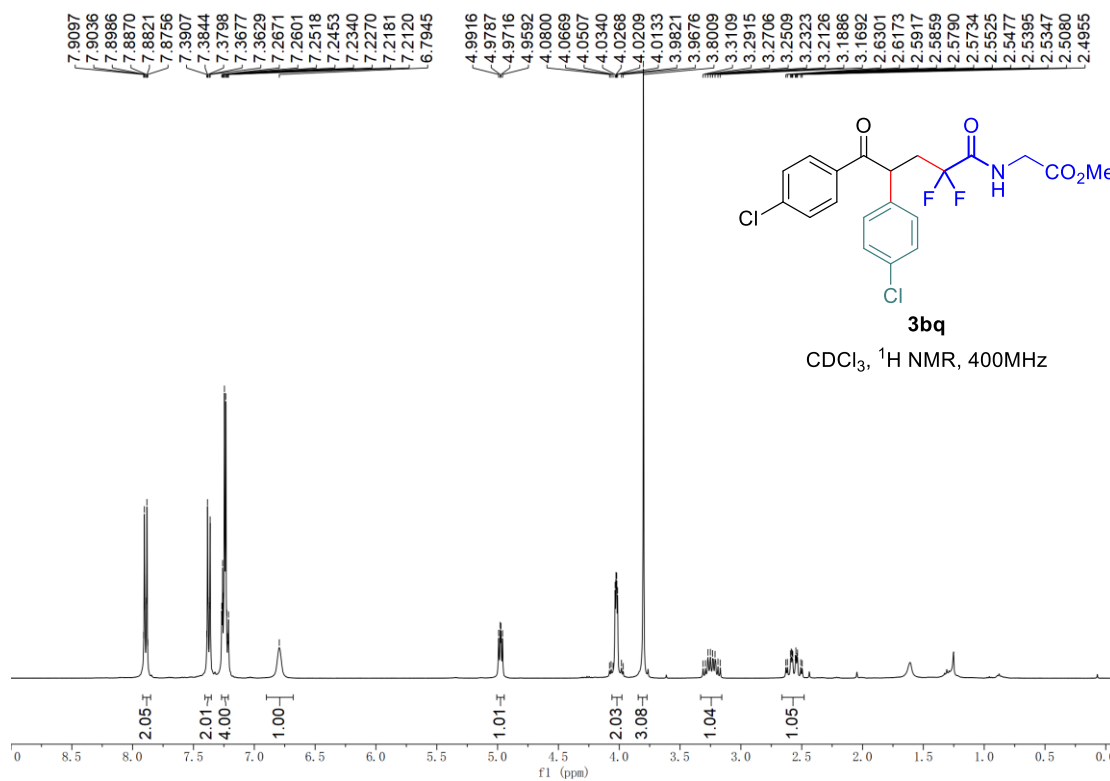

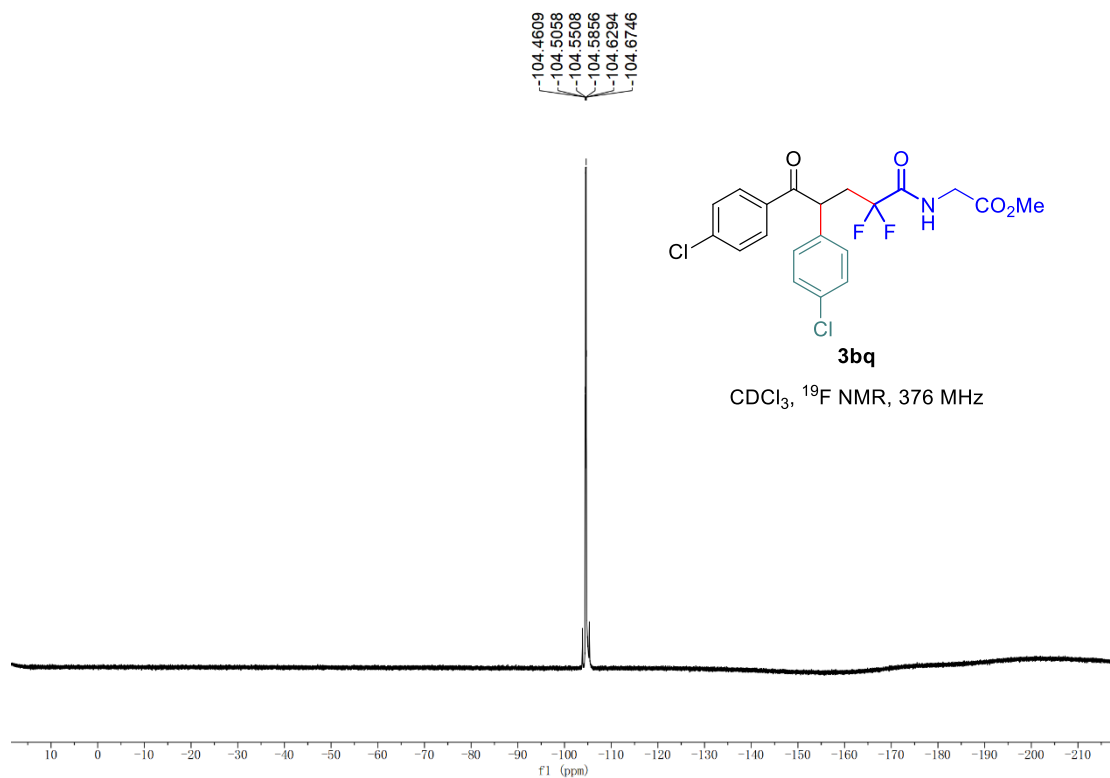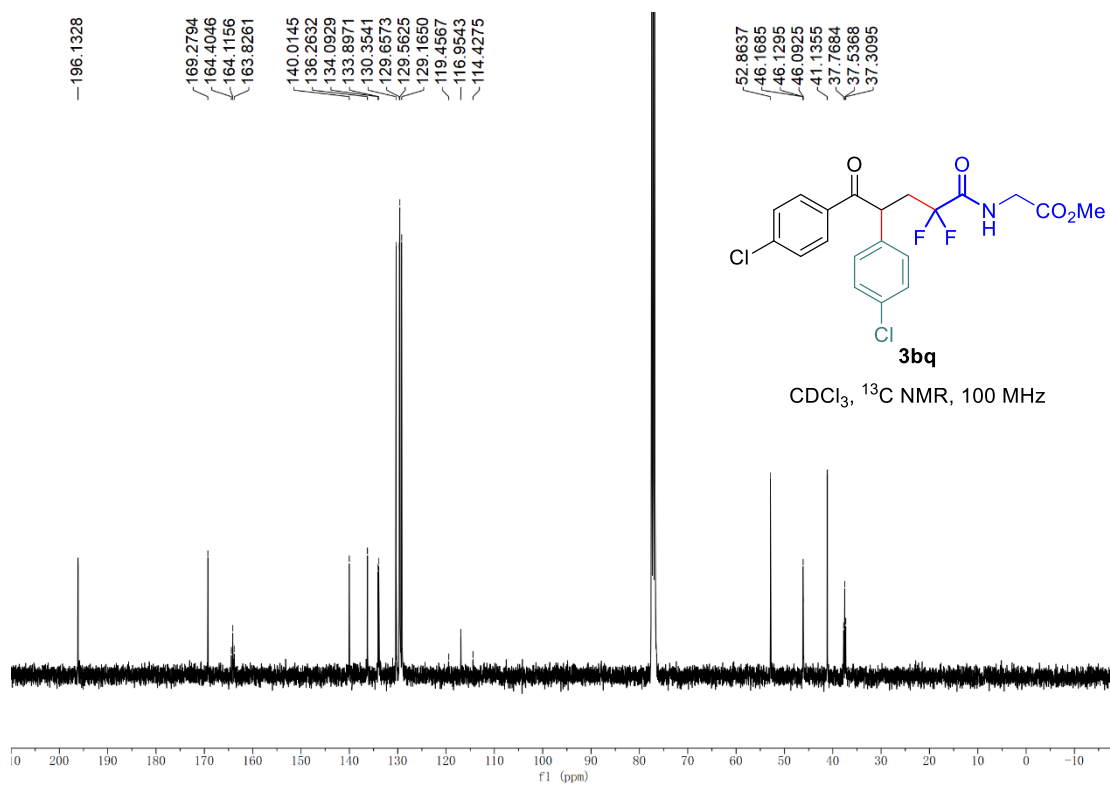

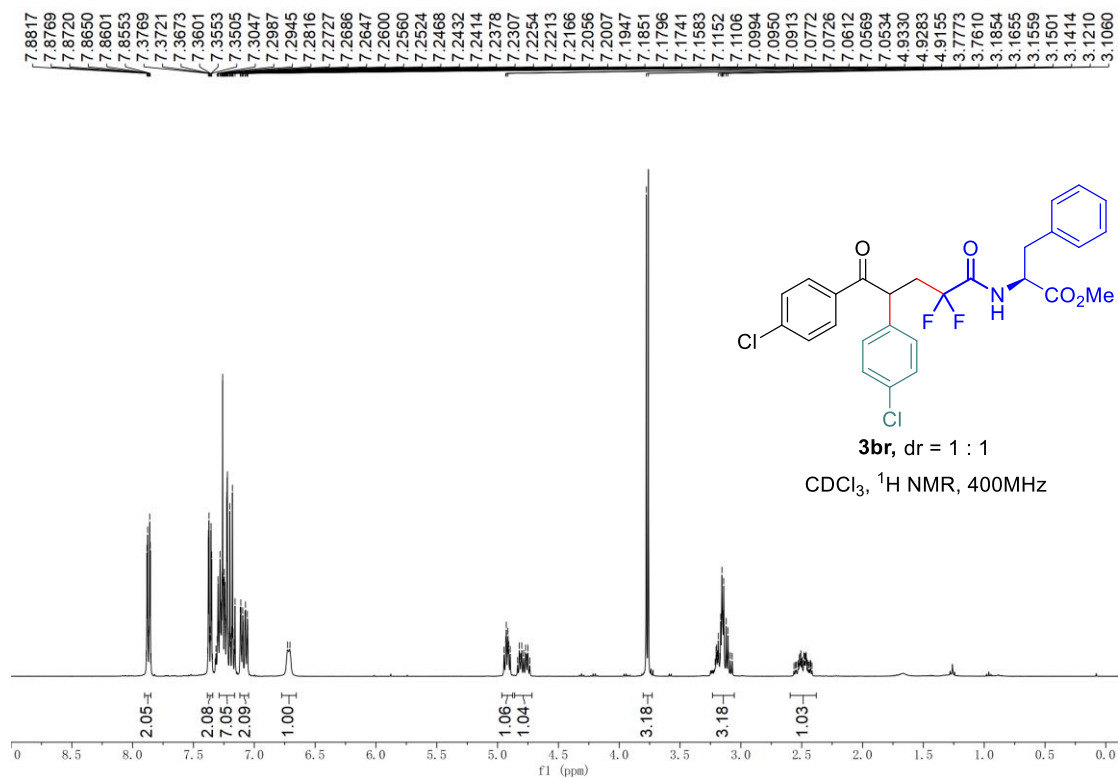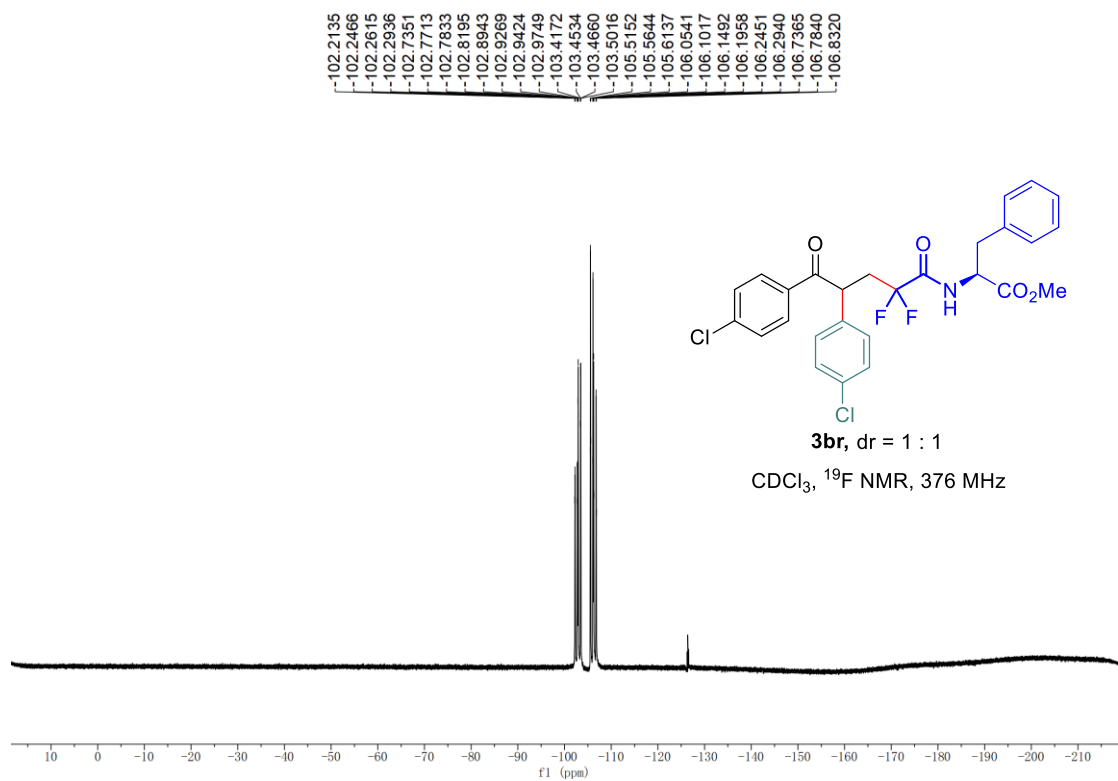

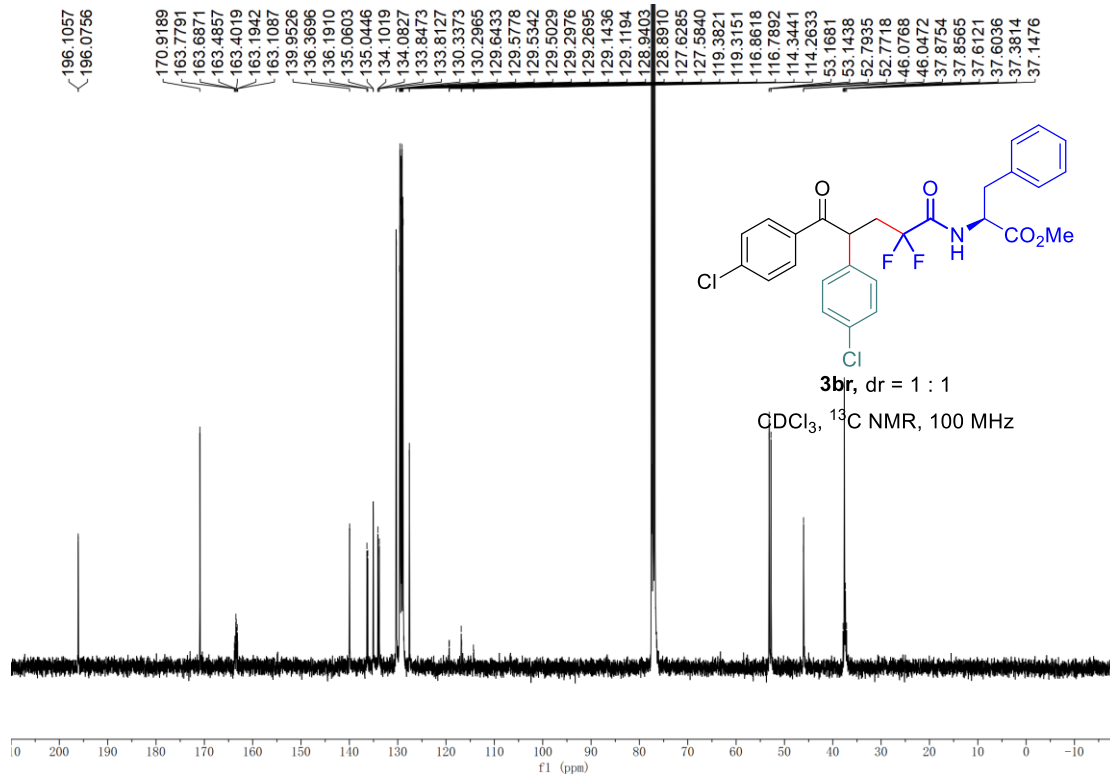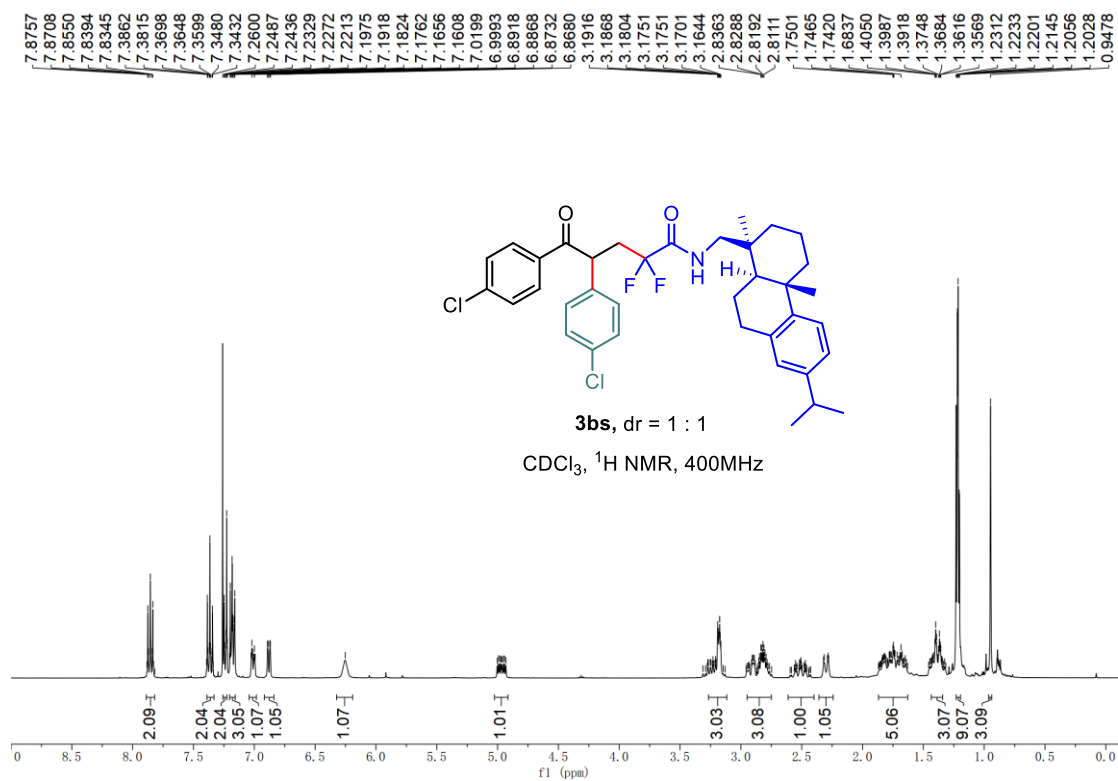

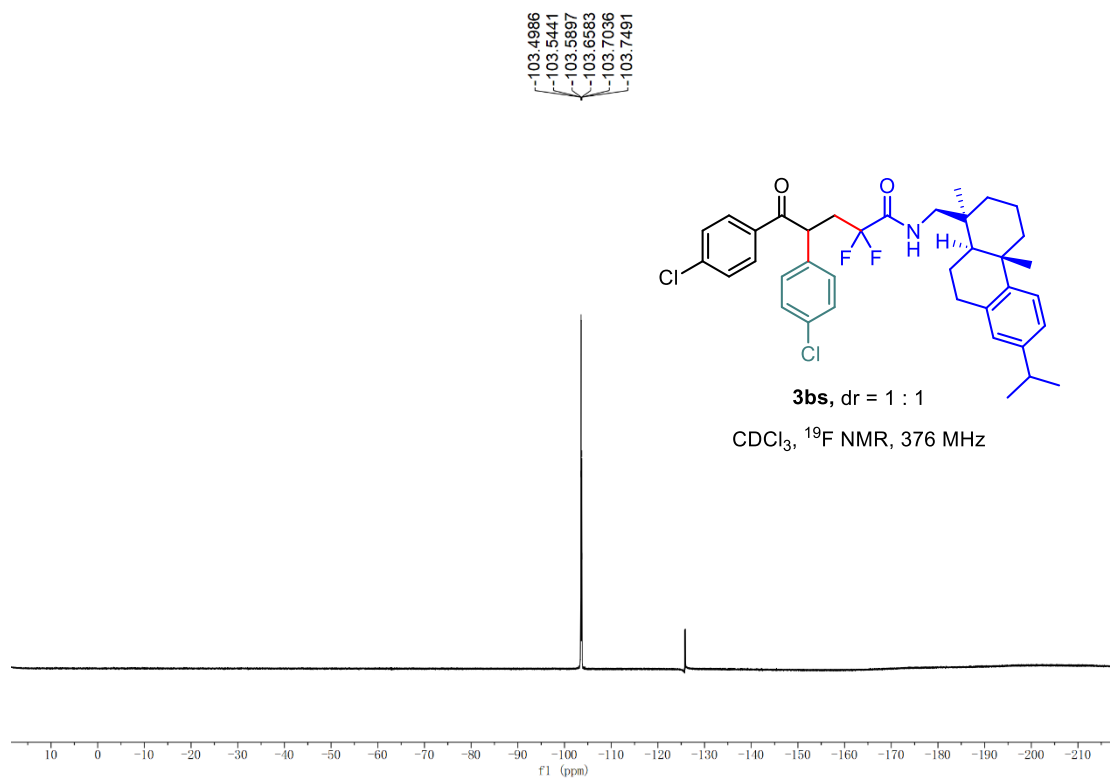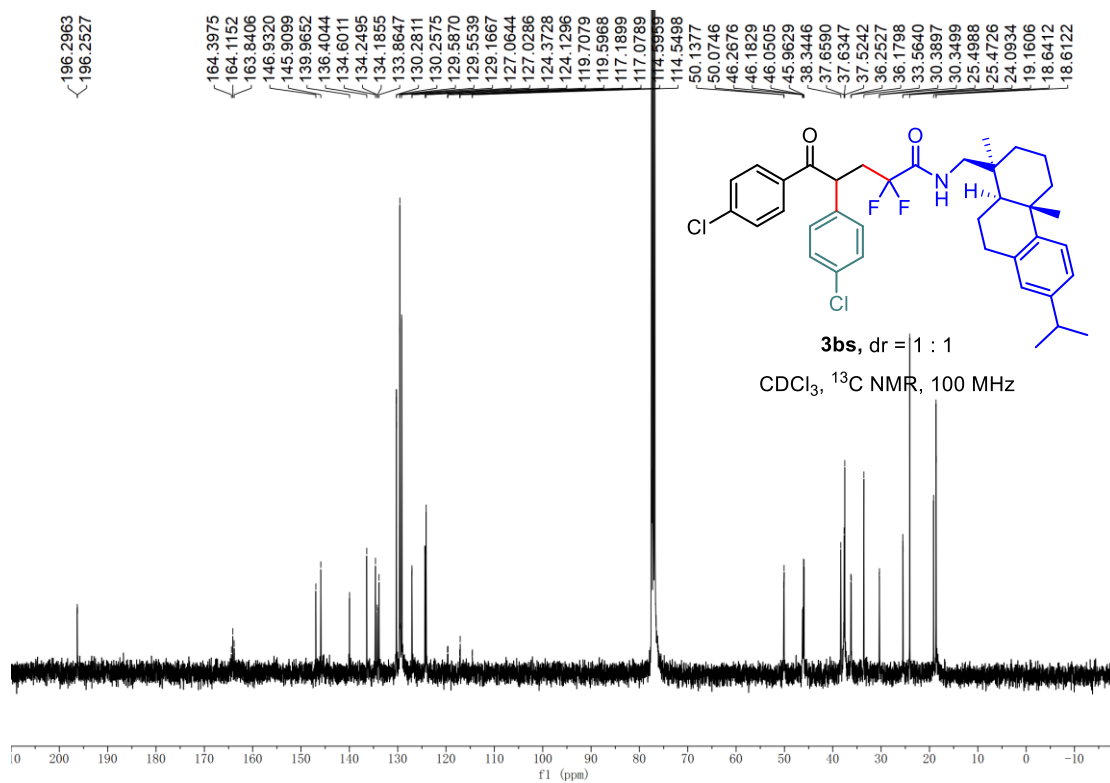

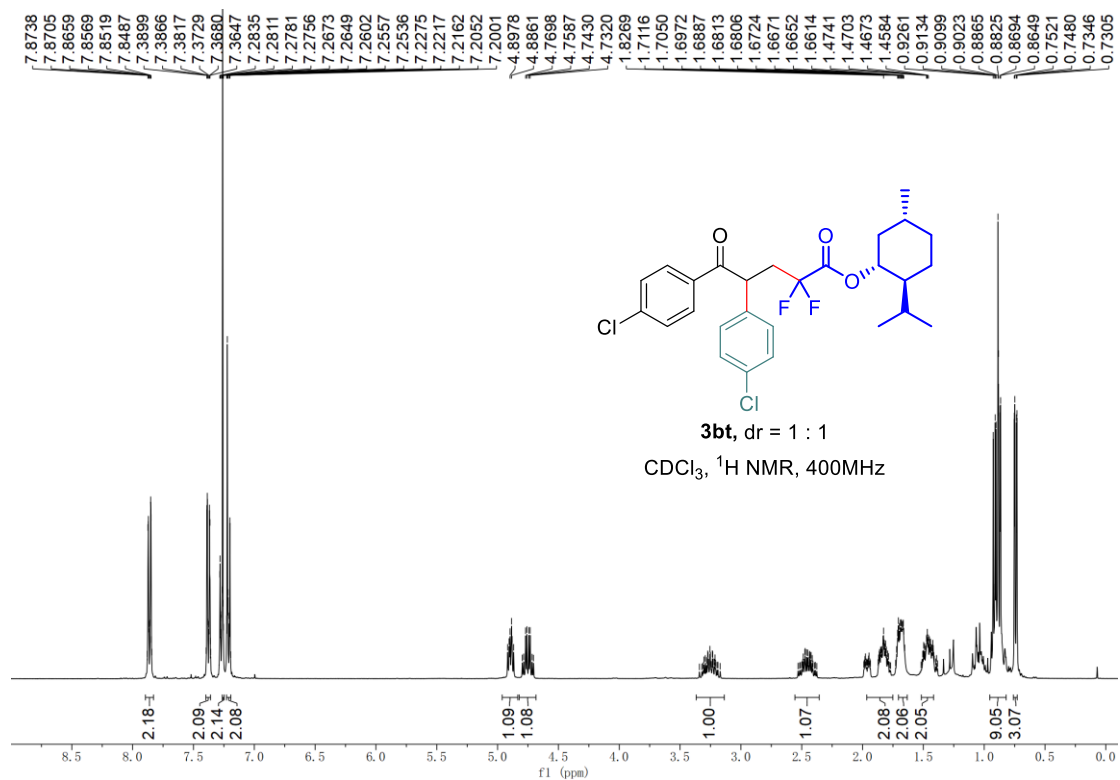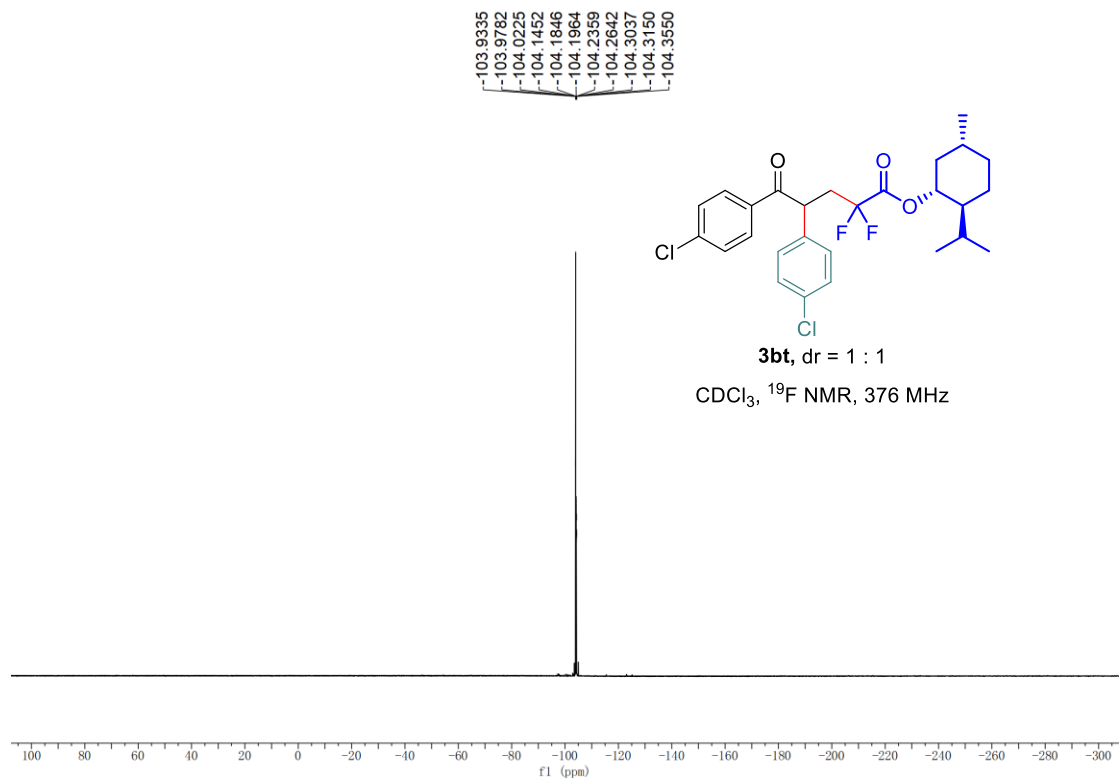

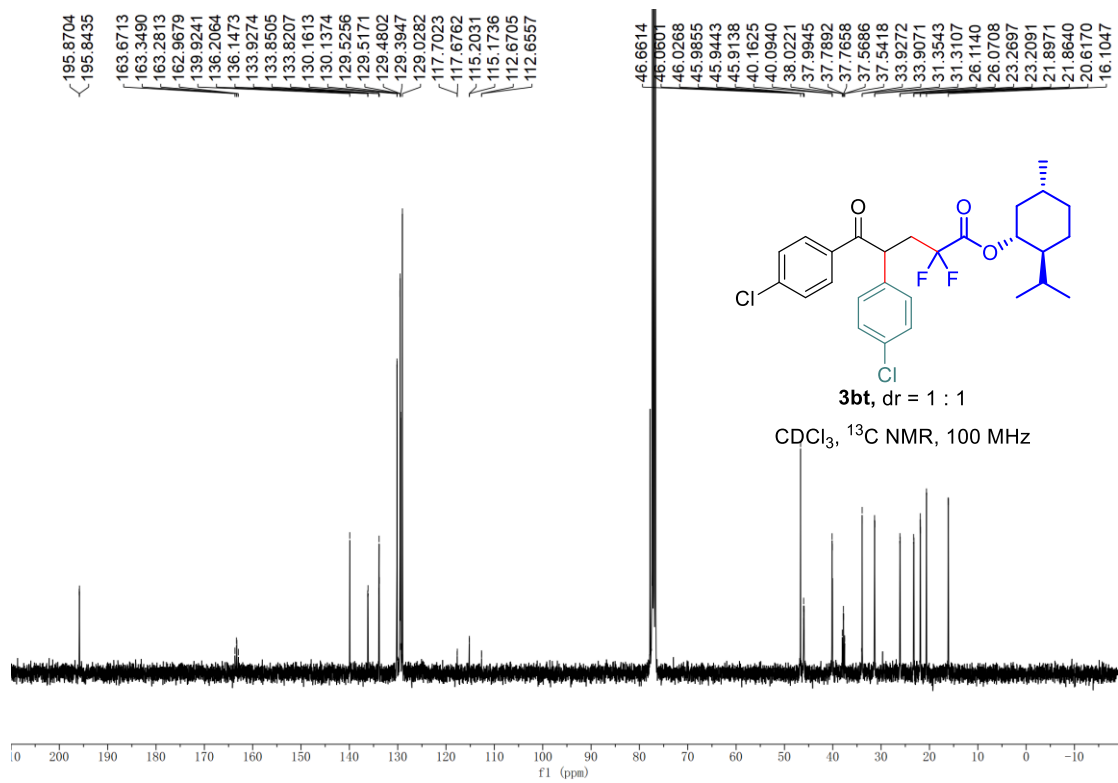

Supplement: d2qo01035f1.pdf [file d2qo01035f1.pdf]
